# Supplementary material for: Systematic trait dissection in oilseed rape provides a comprehensive view, further insight, and exact roadmap for yield determination
Source: Biotechnol Biofuels Bioprod. 2022 Apr 19;15:38. doi: 10.1186/s13068-022-02134-w (PMC9019968; doi:10.1186/s13068-022-02134-w)
Supplement: Supplementary file 10 — Additional file 10: Table S3. Summary statistics of the correlation among 21 traits investigated in six environments. [file 13068_2022_2134_MOESM10_ESM.xlsx]

## Sheet: Table S3
Table S3. Summary statistics of the correlation among 21 traits investigated in six environments.
Trait 1	Trait2	W12		W13		W14		W16		Z13		Z14		Times
		r	P	r	P	r	P	r	P	r	P	r	P
PRO	OIL	-0.67877	6.79454e-24	-0.639033	2.14259e-19	-0.748979	1.74491e-31	-0.791372	3.66691e-35	-0.646513	4.76546e-18	-0.793729	1.12261e-37	6 / 6
TSW	SNPP	-0.53068	1.62437e-13	-0.455922	6.71503e-10	-0.506234	2.55259e-12	-0.370111	1.69833e-06	-0.37418	4.49195e-06	-0.594154	2.07339e-17	6 / 6
PBH	MIL	-0.33823	7.80442e-06	-0.268434	0.000470882	-0.335809	8.58684e-06	-0.0841465	0.293179	0.0667089	0.428592	-0.480828	4.2047e-11	4 / 6
PBH	PNm	0.10637	0.17125	-0.0662714	0.396255	0.111262	0.151056	0.115446	0.148613	0.0476742	0.571789	-0.347906	3.82092e-06	1 / 6
PBH	PNb	-0.47438	9.41203e-11	-0.358261	2.14502e-06	-0.299729	7.91178e-05	-0.172988	0.0297372	-0.46793	3.79891e-09	-0.340264	6.39796e-06	6 / 6
PBH	PNw	-0.45778	4.97514e-10	-0.337844	8.52618e-06	-0.243399	0.00147679	-0.111992	0.161229	-0.418746	1.94274e-07	-0.33198	1.10186e-05	5 / 6
PRO	SYw	-0.13905	0.07311	-0.0379348	0.637146	-0.352774	2.73186e-06	-0.182544	0.0216964	-0.0539915	0.524861	-0.327614	1.45822e-05	3 / 6
PBN	PBH	-0.30321	6.80408e-05	-0.333425	1.13507e-05	-0.153527	0.0469356	-0.176863	0.0262133	-0.199959	0.0166473	-0.324122	1.81908e-05	6 / 6
PRO	SYm	-0.27976	0.000250702	-0.163731	0.0404624	-0.326116	1.60388e-05	-0.356592	4.2494e-06	-0.216804	0.00981514	-0.308653	4.68997e-05	6 / 6
PBH	SYb	-0.21716	0.00482	-0.171591	0.0270693	-0.100162	0.196424	0.0275482	0.731154	-0.36652	7.25347e-06	-0.278542	0.000256199	4 / 6
PRO	SYb	-0.02922	0.70782	0.0283151	0.724821	-0.304636	5.94709e-05	-0.063283	0.429568	0.0115801	0.891595	-0.268534	0.000432392	2 / 6
PRO	SNPP	-0.26187	0.000629589	-0.346524	8.75744e-06	-0.363288	1.29844e-06	-0.415408	5.71708e-08	-0.213021	0.0112081	-0.259723	0.000674351	6 / 6
PL	PNw	-0.5149	1.08834e-12	-0.402797	7.44288e-08	-0.503323	3.56098e-12	-0.363282	2.71315e-06	-0.263993	0.00144305	-0.240469	0.00169081	6 / 6
PL	PNb	-0.47503	8.80043e-11	-0.397713	1.12073e-07	-0.494123	9.9894e-12	-0.389176	4.33328e-07	-0.291562	0.000410792	-0.237218	0.00196114	6 / 6
PH	TSW	0.05752	0.46027	0.112281	0.149792	0.0405155	0.602064	-0.0288155	0.719293	0.0457293	0.588926	-0.232857	0.00238541	1 / 6
TSW	PNb	0.12966	0.09492	-0.206459	0.00761341	-0.10076	0.193753	-0.120795	0.13057	-0.304415	0.000230263	-0.232147	0.00246191	3 / 6
TSW	SYb	0.09235	0.23524	-0.112679	0.148345	-0.0194582	0.802318	-0.0631946	0.430214	-0.118986	0.158431	-0.220916	0.00400628	1 / 6
PBH	SYw	-0.01042	0.89368	-0.0179916	0.818036	0.0804349	0.299991	0.132871	0.0960553	-0.286925	0.000536231	-0.20632	0.00729248	2 / 6
PBN	TSW	-0.0982	0.20673	-0.156954	0.0434387	-0.138791	0.0727808	0.0373472	0.6413	-0.114363	0.175355	-0.203398	0.00818476	2 / 6
PRO	PNw	0.16125	0.03736	0.185472	0.0200398	0.0756496	0.329755	0.182563	0.0216819	-0.0102634	0.903858	-0.195539	0.0110812	4 / 6
PRO	PH	-0.01129	0.88483	-0.0220311	0.78418	0.0809024	0.297182	-0.0154494	0.847221	-0.328897	6.83263e-05	-0.190292	0.0134861	2 / 6
PL	SYb	-0.19599	0.01114	-0.150937	0.0522425	-0.119147	0.123982	-0.151802	0.0569082	-0.0391568	0.643608	-0.188826	0.0142346	2 / 6
SNPP	PNm	-0.02189	0.77886	-0.357488	2.26404e-06	-0.0734058	0.344342	-0.198603	0.0123651	-0.189987	0.0235364	-0.185211	0.0162381	4 / 6
PD	MIL	-0.27167	0.000383094	-0.257838	0.000797113	-0.373305	6.23384e-07	-0.274908	0.000472811	-0.124359	0.138924	-0.182477	0.017912	5 / 6
TSW	SYw	0.07685	0.32359	-0.0371014	0.635094	-0.0862586	0.266239	-0.0397745	0.619764	-0.0785647	0.352698	-0.174424	0.0237421	1 / 6
PRO	PNb	0.18905	0.01441	0.185594	0.0199571	0.0751022	0.333277	0.207841	0.00878113	0.0456189	0.591163	-0.169424	0.0281288	4 / 6
TSW	PNw	0.09563	0.21896	-0.205936	0.00777152	-0.135443	0.0800311	-0.14471	0.0696634	-0.278055	0.000806807	-0.16677	0.0307265	3 / 6
PL	PD	0.07273	0.3503	-0.262141	0.000645379	-0.0141159	0.855892	-0.143334	0.0723898	-0.139676	0.0961537	-0.165513	0.0320256	2 / 6
PRO	MIL	0.00243	0.9751	0.0520674	0.517225	-0.0499972	0.519833	0.03837	0.632187	-0.446707	2.81758e-08	-0.161651	0.0363155	2 / 6
PL	PBN	-0.15814	0.04124	-0.216534	0.00507739	-0.178363	0.0207133	-0.120278	0.132239	-0.189806	0.023177	-0.158262	0.0404695	5 / 6
PBH	TSW	0.01411	0.85641	0.151057	0.0520531	0.0316154	0.684137	-0.0327527	0.68288	0.0796468	0.346085	-0.157734	0.0411514	1 / 6
PRO	PBN	0.17704	0.02209	0.0756777	0.346186	-0.00730721	0.925104	0.210035	0.00807911	0.0517948	0.541885	-0.151373	0.050151	2 / 6
PD	PNb	-0.23102	0.00267	0.261174	0.000676955	-0.120246	0.120527	0.152848	0.0552	0.146463	0.0808988	0.157027	0.0420793	3 / 6
PD	SYw	0.13757	0.07625	0.19832	0.0104264	0.0821376	0.289843	0.172865	0.0298549	0.157773	0.0607612	0.161674	0.0362883	3 / 6
MIL	TSW	0.23546	0.00219	-0.00089898	0.990828	0.127585	0.0993349	0.0340836	0.67073	0.0937882	0.266919	0.170299	0.0273148	2 / 6
PD	SYb	-0.12123	0.1186	0.167677	0.0308225	-0.107861	0.164022	0.14197	0.0751763	0.110444	0.190714	0.190657	0.013305	2 / 6
SNPP	PNb	-0.45966	4.13846e-10	-0.200102	0.00974227	-0.258707	0.00070913	-0.228621	0.00386138	0.120697	0.152489	0.190741	0.0132637	5 / 6
OIL	PNm	0.16923	0.0288	-0.0405227	0.614334	-0.0124843	0.872398	0.00740528	0.926424	0.199833	0.017512	0.193508	0.0119633	3 / 6
PD	PNw	-0.09085	0.24293	0.384478	3.15095e-07	0.0571653	0.46172	0.31697	4.95478e-05	0.274084	0.000924753	0.19553	0.011085	4 / 6
OIL	SYw	0.13212	0.08876	-0.0110698	0.890557	0.320214	2.3222e-05	0.156487	0.0495878	-0.0169824	0.841579	0.203573	0.00812856	3 / 6
TSW	PNm	-0.04698	0.54656	-0.086125	0.269893	-0.103899	0.180159	-0.109946	0.169071	0.135109	0.108904	0.205671	0.00748295	1 / 6
PD	SYm	0.55359	8.54599e-15	0.129965	0.0951347	0.338537	7.17484e-06	0.178853	0.0245471	0.232071	0.00545192	0.211718	0.00586942	5 / 6
PNw	SYm	-0.41703	2.0677e-08	-0.120203	0.122928	-0.214302	0.00528026	-0.0588572	0.462591	0.16044	0.0564766	0.21943	0.00426563	3 / 6
PNb	SYm	-0.48898	2.0184e-11	-0.152218	0.0502537	-0.307183	5.11754e-05	-0.146667	0.0659304	0.0190331	0.822119	0.229171	0.00280724	3 / 6
OIL	MIL	0.16348	0.03477	0.0246252	0.759503	0.0844596	0.276377	-0.064391	0.421518	0.555899	8.33129e-13	0.239981	0.00172914	3 / 6
PH	PBH	0.5919	3.64757e-17	0.58071	2.38213e-16	0.72543	9.97716e-29	0.576277	2.32496e-15	0.464416	5.13928e-09	0.246301	0.00128946	6 / 6
PBN	SNPP	0.00656	0.93295	0.00806014	0.917912	0.132041	0.0879795	-0.088722	0.267624	0.244743	0.0033306	0.247404	0.00122415	2 / 6
PBH	SNPP	0.33668	8.63435e-06	0.203998	0.00838277	0.246269	0.00129141	0.267063	0.00069359	0.136065	0.1064	0.26716	0.000463875	5 / 6
MIL	SYb	0.26802	0.000462125	0.0367752	0.638074	-0.0201675	0.795268	0.117683	0.140852	0.102991	0.222585	0.268224	0.000439317	2 / 6
PH	PNm	0.31548	3.28428e-05	0.164963	0.0336773	0.260841	0.000637907	0.312675	6.33927e-05	0.268459	0.00118757	0.291187	0.000128483	6 / 6
PL	SYm	0.60323	6.29579e-18	0.46248	3.54295e-10	0.556477	4.80935e-15	0.457856	1.46164e-09	0.409834	4.08699e-07	0.296235	9.66499e-05	6 / 6
PBN	MIL	-0.09111	0.24161	-0.084658	0.278166	-0.288577	0.000148545	0.0468967	0.558465	-0.098782	0.240489	0.299437	8.04569e-05	2 / 6
PBN	SYm	-0.18486	0.01677	-0.154749	0.0465096	-0.0785841	0.311285	-0.0744653	0.352436	0.15621	0.0633945	0.304843	5.87515e-05	3 / 6
PH	MIL	0.08811	0.25752	0.295059	0.000113796	0.141199	0.0679051	0.570234	5.2531e-15	0.493145	3.9183e-10	0.312498	3.72417e-05	4 / 6
MIL	SYw	0.1914	0.01322	0.0430135	0.582143	-0.0257828	0.740083	0.160024	0.0445946	0.170975	0.0419111	0.324458	1.78098e-05	4 / 6
OIL	SYm	0.25337	0.000953922	0.240007	0.0024648	0.335696	8.65106e-06	0.307688	8.39945e-05	0.325946	8.00623e-05	0.338009	7.42957e-06	6 / 6
MIL	SYm	-0.07559	0.33162	0.0537353	0.491707	0.0154285	0.842658	0.130369	0.102537	0.388609	1.76096e-06	0.342289	5.5884e-06	2 / 6
SNPP	SYb	-0.05829	0.45434	0.213524	0.0057413	0.214456	0.00524695	0.0671867	0.4016	0.346561	2.39004e-05	0.344408	4.84585e-06	4 / 6
PNm	SYb	0.01088	0.88902	0.174556	0.0244934	-0.0887106	0.252834	0.210669	0.00788553	0.165499	0.0490325	0.357434	1.97111e-06	4 / 6
PBN	PNm	-0.19375	0.01211	-0.0645284	0.408821	-0.285944	0.000171721	0.0216034	0.787602	0.0249341	0.767538	0.360931	1.53758e-06	3 / 6
PH	SNPP	0.35309	2.86393e-06	0.0477657	0.541122	0.168079	0.0294202	0.107385	0.179278	0.279815	0.000744785	0.375526	5.28036e-07	4 / 6
PH	SYm	0.52994	1.77811e-13	0.24953	0.00118644	0.316032	3.00457e-05	0.240544	0.00233139	0.3923	1.37588e-06	0.390822	1.62649e-07	6 / 6
PL	TSW	0.15059	0.05207	0.430554	7.03813e-09	0.351187	3.04952e-06	0.416703	5.14979e-08	0.550618	1.25581e-12	0.396014	1.07566e-07	5 / 6
MIL	PNb	0.32081	2.3698e-05	0.199334	0.010032	0.13647	0.0777463	0.21267	0.00730194	0.0470638	0.576728	0.396037	1.07368e-07	4 / 6
PNm	SYm	0.51128	1.66025e-12	0.132	0.0900241	0.346247	4.27823e-06	0.271129	0.000569475	0.487352	7.71306e-10	0.401127	7.10894e-08	5 / 6
PNm	SYw	0.22824	0.00301	0.19553	0.0115829	0.0858265	0.268651	0.271941	0.000547293	0.261516	0.00166838	0.407147	4.32623e-08	5 / 6
SNPP	SYw	0.22362	0.00367	0.394954	1.39542e-07	0.501659	4.30107e-12	0.338858	1.32997e-05	0.446764	2.50089e-08	0.415907	2.06322e-08	6 / 6
PH	SYb	0.26004	0.000689413	0.361223	1.74165e-06	0.169461	0.028094	0.349145	6.91921e-06	0.185826	0.0268203	0.418065	1.71351e-08	6 / 6
SYm	SYb	-0.01575	0.8399	0.290719	0.000144841	0.194526	0.011514	0.165499	0.0376982	0.348136	2.18168e-05	0.424224	1.00141e-08	5 / 6
MIL	PNw	0.39492	1.2817e-07	0.251942	0.00105848	0.223319	0.00361689	0.299002	0.000135503	0.152258	0.0694684	0.4354	3.67432e-09	5 / 6
PNm	PNb	-0.06528	0.40193	0.388485	2.31519e-07	0.0349536	0.652851	0.282285	0.000326313	0.133811	0.111098	0.455594	5.46022e-10	3 / 6
PH	PNw	-0.00373	0.96184	0.279127	0.000270757	0.141818	0.066695	0.373856	1.30747e-06	0.176456	0.0350173	0.510466	1.56453e-12	4 / 6
SNPP	SYm	0.63493	3.13023e-20	0.634929	4.06649e-20	0.766281	1.02954e-33	0.759986	5.37087e-31	0.515955	4.98259e-11	0.510671	1.52759e-12	6 / 6
PH	PNb	-0.06072	0.43566	0.28441	0.00020428	0.0679481	0.381495	0.318578	4.51369e-05	0.137317	0.101961	0.510778	1.50878e-12	3 / 6
PNm	PNw	0.11432	0.14128	0.53778	7.94307e-14	0.272796	0.000346839	0.50141	1.93912e-11	0.330807	5.45146e-05	0.532728	1.06248e-13	5 / 6
PH	PBN	0.15154	0.05059	0.211053	0.00634314	0.127733	0.0989395	0.309059	7.77784e-05	0.177571	0.0338628	0.537724	5.65259e-14	4 / 6
SYm	SYw	0.42281	1.25513e-08	0.592434	4.18567e-17	0.570918	6.47239e-16	0.514534	4.65705e-12	0.564147	2.65214e-13	0.540617	3.9036e-14	6 / 6
PH	SYw	0.45644	5.6682e-10	0.396294	1.2548e-07	0.293716	0.000111475	0.393743	3.0837e-07	0.223746	0.00743514	0.544259	2.43696e-14	6 / 6
PD	PNm	0.80612	1.94041e-39	0.732912	3.10423e-29	0.634404	2.64903e-20	0.731644	9.48951e-28	0.672836	3.46302e-20	0.574846	3.68726e-16	6 / 6
MIL	PNm	0.32936	1.38542e-05	0.442418	2.40246e-09	0.449381	9.94767e-10	0.424965	2.61523e-08	0.502311	1.6372e-10	0.615225	7.1382e-19	6 / 6
PBN	SYw	0.40148	7.56104e-08	0.492994	1.50324e-11	0.522623	3.69043e-13	0.517139	3.483e-12	0.39677	1.01632e-06	0.645585	3.48166e-21	6 / 6
PBN	SYb	0.51032	1.85664e-12	0.667891	8.4861e-23	0.630544	5.23563e-20	0.638845	1.69609e-19	0.486542	8.30548e-10	0.650904	1.287e-21	6 / 6
PBN	PNw	0.52432	3.53772e-13	0.601683	1.00933e-17	0.55697	4.49828e-15	0.65176	1.79215e-20	0.401732	6.59292e-07	0.696584	1.02219e-25	6 / 6
PNw	SYb	0.69717	1.25289e-25	0.751458	1.98369e-31	0.634453	2.6261e-20	0.74087	9.2664e-29	0.794865	3.55672e-32	0.725748	9.19722e-29	6 / 6
PBN	PNb	0.59668	1.75276e-17	0.677916	1.10725e-23	0.645992	3.229e-21	0.718151	2.40969e-26	0.484513	8.70752e-10	0.754343	3.72e-32	6 / 6
PNb	SYw	0.41165	3.26267e-08	0.597246	2.00851e-17	0.456392	5.05096e-10	0.617935	5.18902e-18	0.699078	3.8651e-22	0.781961	6.59644e-36	6 / 6
PNw	SYw	0.42999	6.65853e-09	0.578248	3.40209e-16	0.464524	2.25686e-10	0.616941	6.0668e-18	0.789724	1.65613e-31	0.799692	1.28607e-38	6 / 6
PNb	SYb	0.67749	8.86647e-24	0.792583	4.56819e-37	0.693515	2.03631e-25	0.782133	7.27718e-34	0.830863	1.86133e-37	0.824891	5.63494e-43	6 / 6
SYb	SYw	0.87694	2.19712e-54	0.923695	3.13731e-70	0.886314	2.20135e-57	0.917418	2.57285e-64	0.915641	2.86463e-57	0.843488	1.14726e-46	6 / 6
PNb	PNw	0.94585	1.53957e-82	0.980391	1.30915e-117	0.957201	2.66018e-91	0.95908	2.15629e-87	0.933555	1.06599e-64	0.916233	7.70766e-68	6 / 6
PRO	PNm	-0.17769	0.0216	0.0993665	0.215651	0.00833876	0.914569	-0.0485975	0.54427	-0.169271	0.0447931	-0.139463	0.0713923	2 / 6
OIL	TSW	-0.0173	0.82443	0.0226751	0.778033	0.087314	0.260411	-0.0603536	0.451272	0.235869	0.00486718	0.137789	0.0748932	1 / 6
OIL	PBH	0.24811	0.00123	0.279324	0.000395996	-0.0133021	0.864117	0.115434	0.148655	0.0545913	0.52026	-0.136989	0.0766133	2 / 6
OIL	SYb	0.05	0.52105	-0.128626	0.108388	0.242641	0.00152961	0.0532521	0.506355	-0.119839	0.156937	0.136261	0.0782079	1 / 6
PRO	PL	0.09427	0.22561	0.102236	0.20262	-0.0683623	0.378593	-0.0846318	0.290394	0.0769626	0.364359	0.126288	0.102849	0 / 6
MIL	SNPP	-0.30829	5.05055e-05	-0.205335	0.00795645	-0.243994	0.00143643	-0.115906	0.146992	0.0116656	0.890408	-0.123506	0.110715	3 / 6
PD	SNPP	0.1511	0.05128	-0.205496	0.00790649	0.131134	0.0902031	-0.131993	0.0982917	-0.211144	0.0116577	-0.121195	0.117602	2 / 6
PL	MIL	-0.19715	0.01066	0.0731365	0.34905	-0.0245677	0.751923	0.0894056	0.26394	0.0597107	0.478696	0.116344	0.133139	1 / 6
PD	TSW	-0.19172	0.01306	-0.0955755	0.220611	-0.211871	0.00583283	-0.145184	0.0687433	0.0445123	0.59889	0.112515	0.146478	2 / 6
PRO	TSW	0.28946	0.000148141	0.239171	0.0025549	0.11596	0.134435	0.207658	0.0088423	0.138918	0.100414	0.10742	0.165764	3 / 6
PL	SYw	0.08849	0.25545	0.0331016	0.67202	0.114023	0.141106	0.0543529	0.497593	0.0726728	0.390076	-0.103958	0.179913	0 / 6
PD	PBH	0.32531	1.79015e-05	0.136526	0.0794391	0.40718	4.31407e-08	0.171908	0.0307888	0.0561985	0.504986	0.0941974	0.224547	3 / 6
TSW	SYm	-0.03838	0.62242	0.134029	0.0851477	-0.0841078	0.278389	0.0109099	0.891781	0.277284	0.000835473	0.0939261	0.225891	1 / 6
PL	PH	0.34204	6.06597e-06	0.111281	0.153475	0.220402	0.00409446	0.144091	0.0708792	0.106801	0.204235	-0.0899845	0.246057	2 / 6
PL	PNm	-0.01232	0.8744	-0.200324	0.00965959	-0.0434607	0.575907	-0.081214	0.310385	-0.0881905	0.294919	-0.0897072	0.247522	1 / 6
PD	PBN	-0.12553	0.10602	-0.0158532	0.839351	-0.0898716	0.246653	0.00304335	0.969727	0.0329499	0.69604	0.0846732	0.27516	0 / 6
SNPP	PNw	-0.48341	3.66269e-11	-0.249286	0.00120015	-0.263264	0.000565096	-0.249191	0.001592	0.103946	0.218305	0.0804339	0.299997	4 / 6
PRO	PBH	-0.1733	0.02512	-0.144379	0.0712196	0.137079	0.0764187	-0.182476	0.021746	-0.0679358	0.423458	0.0659432	0.395734	2 / 6
OIL	PNw	-0.15011	0.05283	-0.277022	0.000444187	-0.142001	0.0663406	-0.229283	0.00375709	-0.120682	0.15402	0.0646711	0.404931	2 / 6
OIL	SNPP	0.12002	0.12236	0.215383	0.00674763	0.259526	0.000680993	0.3149	5.5821e-05	0.085713	0.312214	0.0642282	0.408162	3 / 6
PH	PD	0.27328	0.00035249	-0.0407153	0.602483	0.13878	0.0728044	-0.0858209	0.283646	0.0408902	0.627756	0.0387213	0.618255	1 / 6
PRO	PD	-0.19059	0.01362	0.0733619	0.361186	0.0575476	0.458726	-0.0486559	0.543785	0.146038	0.0839978	0.0321218	0.679355	1 / 6
OIL	PH	0.03224	0.67919	0.175402	0.0280001	-0.0265498	0.73264	-0.0461005	0.56517	0.308313	0.000199658	0.0314324	0.685868	2 / 6
OIL	PL	0.04311	0.58017	0.175883	0.0275661	0.28989	0.000138113	0.176769	0.0262948	0.316811	0.000129446	0.0246459	0.75116	4 / 6
OIL	PNb	-0.2131	0.00569	-0.292619	0.000200058	-0.12926	0.0949393	-0.244712	0.00194297	-0.193114	0.0217715	0.0242248	0.755276	4 / 6
PL	SNPP	0.51742	8.0786e-13	0.196377	0.0112204	0.36538	1.11626e-06	0.278117	0.000402894	0.16197	0.0541324	0.022874	0.768524	4 / 6
OIL	PD	0.0827	0.28799	-0.0829061	0.301937	-0.0940767	0.225145	0.0376956	0.63819	-0.18319	0.0296805	-0.0135217	0.861897	1 / 6
PBH	SYm	0.45131	9.29193e-10	0.311312	4.45373e-05	0.344517	4.81035e-06	0.305723	9.37153e-05	0.122332	0.146968	-0.00641894	0.934187	4 / 6
PL	PBH	0.38967	1.9397e-07	0.220196	0.00436279	0.330372	1.22228e-05	0.219514	0.0055847	0.17035	0.0419414	-0.00589029	0.939596	5 / 6
OIL	PBN	-0.32384	1.96186e-05	-0.236367	0.00287911	-0.111759	0.149225	-0.171084	0.0316116	-0.138292	0.101969	0.000919268	0.990564	3 / 6
PD	BoT	/	/	-0.156739	0.0437305	0.215538	0.00501774	-0.0950068	0.235061	-0.222657	0.00752086	/	/	3 / 4
FlT	PNm	0.30689	5.48705e-05	-0.114363	0.142336	0.373797	6.00966e-07	0.145498	0.0681394	-0.205036	0.0140295	/	/	3 / 5
FlT	SYm	0.50803	2.41687e-12	-0.232531	0.00257191	0.411667	2.96014e-08	0.11011	0.168431	-0.201369	0.016259	/	/	4 / 5
BoT	SYm	/	/	-0.270182	0.000430811	0.271117	0.000378484	0.0825664	0.30237	-0.193522	0.0210241	/	/	3 / 4
MIL	FlT	-0.30923	4.777e-05	0.0518736	0.506856	-0.0867468	0.263532	0.104374	0.191856	-0.192836	0.0210297	/	/	2 / 5
MaT	SNPP	-0.03935	0.62239	-0.186429	0.0161748	-0.110607	0.15349	-0.0825543	0.302441	-0.18914	0.0241756	/	/	2 / 5
PRO	BoT	/	/	0.139296	0.0818732	-0.179868	0.0196474	-0.0217704	0.785999	-0.174013	0.0390488	/	/	2 / 4
BoT	PNm	/	/	-0.100356	0.198276	0.23432	0.00223463	-0.0976697	0.222138	-0.172801	0.0390352	/	/	2 / 4
MIL	FET	/	/	0.230262	0.00284034	-0.0675834	0.384062	0.124861	0.11802	-0.166175	0.0473078	/	/	2 / 4
MaT	FlT	0.37465	1.14273e-06	0.448748	1.18597e-09	0.467329	1.70088e-10	0.469036	5.1031e-10	0.180365	0.0305185	/	/	5 / 5
PH	BuT	/	/	-0.19554	0.0115786	0.301718	7.05169e-05	0.373921	1.30156e-06	0.20792	0.0127087	/	/	4 / 4
PBH	BuT	/	/	-0.0728194	0.35115	0.351122	3.06329e-06	0.300582	0.000124351	0.231349	0.00543475	/	/	3 / 4
PRO	MaT	0.23081	0.00342	0.33861	1.43979e-05	0.336855	8.01674e-06	0.345499	8.74567e-06	0.258528	0.00196596	/	/	5 / 5
MaT	TSW	0.16634	0.03612	0.197647	0.0106954	0.144089	0.0624063	0.0283317	0.723813	0.282522	0.000657883	/	/	3 / 5
FET	BuT	/	/	0.750206	1.86521e-31	0.565785	1.33519e-15	0.801342	1.22502e-36	0.350168	1.68943e-05	/	/	4 / 4
PL	MaT	0.25954	0.000954504	0.185937	0.0164634	0.227898	0.00296798	0.0916839	0.251914	0.374437	4.08436e-06	/	/	4 / 5
FlT	BuT	/	/	0.868258	4.2064e-52	0.775557	5.45136e-35	0.876093	2.73264e-51	0.439069	3.69017e-08	/	/	4 / 4
FET	FlT	/	/	0.76084	8.37573e-33	0.530225	1.45201e-13	0.903255	3.37446e-59	0.828952	1.18275e-37	/	/	4 / 4
PH	MaT	0.09038	0.25721	-0.0688075	0.378389	0.289608	0.000140294	0.289396	0.00022602	-0.159615	0.0568856	/	/	2 / 5
PBN	BoT	/	/	0.0277557	0.722609	-0.110389	0.154308	-0.164592	0.0387743	-0.157227	0.0607455	/	/	1 / 4
MaT	FET	/	/	0.421199	1.44351e-08	0.447742	1.16308e-09	0.42958	1.77694e-08	0.149141	0.074409	/	/	3 / 4
BoT	SYw	/	/	-0.209684	0.00670023	-0.0941763	0.224652	-0.130546	0.102067	-0.13697	0.104072	/	/	1 / 4
BuT	SYm	/	/	-0.187789	0.0154012	0.215961	0.00493056	0.129958	0.103633	0.126305	0.134185	/	/	2 / 4
BuT	SNPP	/	/	0.103163	0.185953	0.261425	0.000619625	0.198026	0.0126266	0.126016	0.135085	/	/	2 / 4
BuT	BoT	/	/	0.593696	2.77344e-17	0.556662	4.69049e-15	0.647128	4.06274e-20	-0.119908	0.152281	/	/	3 / 4
FET	PNm	/	/	0.0263958	0.735683	0.0853908	0.271097	0.157729	0.0477839	-0.11849	0.158695	/	/	1 / 4
BuT	SYw	/	/	-0.185553	0.0166913	-0.147168	0.0569553	0.0429135	0.592389	0.115457	0.171236	/	/	1 / 4
PH	BoT	/	/	-0.359728	1.93519e-06	-0.047966	0.536955	-0.0710566	0.374973	-0.114336	0.173918	/	/	1 / 4
PBN	MaT	-0.03078	0.70014	-0.0707924	0.364755	0.0423939	0.58532	0.133503	0.094471	-0.112427	0.181265	/	/	0 / 5
FlT	SYw	-0.02929	0.70708	-0.235903	0.0022153	-0.0404282	0.602848	0.0168759	0.833311	-0.111244	0.187501	/	/	1 / 5
PBH	BoT	/	/	-0.378095	5.10544e-07	-0.0357227	0.645725	-0.0801184	0.316979	-0.104355	0.214848	/	/	1 / 4
MIL	MaT	-0.17832	0.02453	0.0756275	0.332836	0.0378637	0.62606	0.17568	0.0272491	-0.101322	0.228549	/	/	2 / 5
PL	BoT	/	/	-0.0109305	0.888842	0.268467	0.00043389	0.0597039	0.456168	-0.101025	0.229922	/	/	1 / 4
PBH	MaT	0.16937	0.03282	-0.0136643	0.861292	0.247489	0.00121922	0.0998431	0.211971	-0.0983673	0.242478	/	/	2 / 5
BoT	SNPP	/	/	0.0120429	0.877614	0.191085	0.0130957	0.281889	0.000332965	-0.0914079	0.279301	/	/	2 / 4
PL	BuT	/	/	0.0233361	0.765373	0.280233	0.000234051	0.0538307	0.501739	0.0905563	0.282105	/	/	1 / 4
FET	SYm	/	/	-0.150653	0.0526929	-0.0442836	0.568694	0.0648882	0.417935	-0.0827796	0.327384	/	/	0 / 4
BoT	SYb	/	/	-0.110916	0.154837	-0.249693	0.00109819	-0.205091	0.00973723	-0.0811831	0.336832	/	/	2 / 4
FlT	SNPP	0.35043	3.43968e-06	0.025854	0.740914	0.340208	6.42179e-06	0.186831	0.0187474	-0.0811698	0.336911	/	/	3 / 5
FET	TSW	/	/	-0.196971	0.0109719	-0.152891	0.0478665	-0.415379	5.73059e-08	-0.081071	0.337501	/	/	3 / 4
PRO	FET	/	/	0.253303	0.0013701	0.252415	0.000963892	0.188827	0.0174972	0.0791179	0.351041	/	/	3 / 4
PL	FlT	0.5101	1.90469e-12	0.0780132	0.317766	0.361894	1.43518e-06	0.0582773	0.46702	0.0747166	0.375144	/	/	2 / 5
FlT	SYb	-0.28691	0.000170485	-0.177734	0.0219683	-0.27283	0.000346222	-0.0343449	0.668355	-0.0742335	0.37995	/	/	3 / 5
OIL	MaT	-0.19878	0.01201	-0.195161	0.0143086	-0.119527	0.122779	-0.311481	6.78404e-05	0.0739084	0.383758	/	/	3 / 5
PRO	FlT	0.17524	0.02351	0.235492	0.00298776	0.0484118	0.533173	0.212856	0.00724948	0.0738917	0.383865	/	/	3 / 5
BoT	PNw	/	/	0.017766	0.820278	-0.252644	0.000953291	-0.112516	0.159264	-0.0731619	0.385189	/	/	1 / 4
OIL	FlT	-0.23068	0.00271	-0.307039	9.17835e-05	-0.0511227	0.510468	-0.430061	1.7063e-08	-0.069803	0.410798	/	/	3 / 5
PD	BuT	/	/	-0.136803	0.0788266	0.252131	0.000977156	0.0511391	0.523394	0.0664159	0.430627	/	/	1 / 4
OIL	BuT	/	/	-0.284344	0.000307214	-0.160299	0.0379266	-0.294776	0.000170085	-0.0617148	0.467231	/	/	3 / 4
OIL	BoT	/	/	-0.214	0.00711867	0.145683	0.0595326	-0.146138	0.0669224	0.0605846	0.475441	/	/	1 / 4
FET	BoT	/	/	0.460256	3.90149e-10	0.306754	5.2493e-05	0.646269	4.72115e-20	-0.059664	0.47748	/	/	3 / 4
FlT	TSW	-0.08367	0.28237	-0.2528	0.00101611	-0.185794	0.0158993	-0.338378	1.37041e-05	-0.0585775	0.48865	/	/	3 / 5
MaT	BoT	/	/	0.224762	0.00349796	0.241604	0.00160473	0.330766	2.18838e-05	-0.0580158	0.489752	/	/	3 / 4
PD	FlT	0.47964	5.45032e-11	-0.116313	0.135611	0.492243	1.22871e-11	0.0895459	0.263188	-0.0569051	0.499637	/	/	2 / 5
PBN	FlT	-0.09985	0.19917	0.0213567	0.784766	-0.0585748	0.450731	-0.000242923	0.997583	-0.0509098	0.545949	/	/	0 / 5
FET	PNb	/	/	-0.0005252	0.994642	-0.0700715	0.366759	0.0925674	0.247354	0.0505821	0.54854	/	/	0 / 4
PD	MaT	0.19233	0.01515	-0.140858	0.0702725	0.147506	0.0563816	-0.0818586	0.306547	0.0502525	0.551152	/	/	1 / 5
MaT	PNm	0.1205	0.13028	-0.0816163	0.29586	0.165513	0.0320259	0.0379508	0.635916	-0.0490879	0.560429	/	/	1 / 5
BuT	PNw	/	/	-0.0934812	0.230939	-0.295132	0.000102895	0.125263	0.116832	0.0485455	0.564775	/	/	1 / 4
MaT	BuT	/	/	0.436456	3.71823e-09	0.381549	3.34499e-07	0.404233	1.3841e-07	0.0480852	0.567102	/	/	3 / 4
PL	FET	/	/	0.0670753	0.390538	0.0465818	0.548782	-0.0146959	0.854588	0.0453135	0.590998	/	/	0 / 4
FlT	PNw	-0.41698	2.07685e-08	-0.0466368	0.550736	-0.223058	0.00365745	0.127241	0.11112	-0.0427678	0.612034	/	/	2 / 5
PH	FlT	0.46378	2.75276e-10	-0.0977816	0.210091	0.37593	5.12243e-07	0.340082	1.23198e-05	-0.0426267	0.613209	/	/	3 / 5
PBH	FET	/	/	-0.14255	0.0669341	0.235293	0.00213921	0.233687	0.00312567	0.0423938	0.615152	/	/	2 / 4
MaT	SYm	0.10758	0.17709	-0.154358	0.0470715	0.00748273	0.923311	-0.0759747	0.342734	0.0418956	0.620566	/	/	1 / 5
BuT	SYb	/	/	-0.15986	0.0396531	-0.296637	9.44628e-05	-0.0133011	0.868258	0.0367051	0.664527	/	/	2 / 4
FET	SNPP	/	/	-0.0152933	0.844953	0.0163523	0.83337	0.168307	0.0345251	0.0340251	0.687692	/	/	1 / 4
OIL	FET	/	/	-0.275584	0.000476987	-0.251235	0.00102014	-0.411261	7.96737e-08	-0.0311411	0.713934	/	/	3 / 4
MaT	SYb	-0.21999	0.00533	-0.260407	0.000702998	-0.163524	0.0341776	0.0411867	0.607381	0.0304315	0.719213	/	/	3 / 5
PRO	BuT	/	/	0.210182	0.00823922	0.079064	0.30833	0.0778558	0.330882	-0.0300235	0.723777	/	/	1 / 4
BoT	TSW	/	/	-0.317857	3.00484e-05	-0.0207683	0.789309	-0.326557	2.81988e-05	-0.0287852	0.733816	/	/	2 / 4
BuT	PNm	/	/	-0.14899	0.0553893	0.0481356	0.535514	0.164582	0.0387865	0.0273525	0.745727	/	/	1 / 4
MaT	PNw	-0.14687	0.06469	-0.187118	0.0157786	-0.00461734	0.952633	0.123596	0.121821	-0.0264818	0.753558	/	/	1 / 5
FlT	BoT	/	/	0.624954	1.77458e-19	0.640668	8.58762e-21	0.647093	4.0877e-20	-0.0243313	0.772219	/	/	3 / 4
MIL	BuT	/	/	0.0439427	0.57401	-0.199311	0.00959412	0.176552	0.0264826	-0.0217116	0.796881	/	/	2 / 4
BoT	PNb	/	/	0.0366356	0.63935	-0.323214	1.92579e-05	-0.1151	0.149843	-0.0185695	0.825771	/	/	1 / 4
PBN	BuT	/	/	-0.0408369	0.6014	0.0676353	0.383696	-0.0096184	0.904527	0.0182237	0.828965	/	/	0 / 4
FET	PNw	/	/	0.00795844	0.918944	-0.0304348	0.695335	0.15383	0.0536371	0.0178837	0.832109	/	/	0 / 4
BuT	TSW	/	/	-0.293445	0.000124534	-0.132519	0.0868258	-0.311542	6.76063e-05	0.0178311	0.833183	/	/	2 / 4
PBH	FlT	0.4038	6.25699e-08	-0.0264084	0.735562	0.409916	3.43109e-08	0.313472	6.05766e-05	0.0157504	0.851891	/	/	3 / 5
PH	FET	/	/	-0.0742881	0.341494	0.272525	0.000351775	0.28084	0.000351188	-0.0128947	0.878516	/	/	2 / 4
MaT	PNb	-0.13663	0.08593	-0.188572	0.0149707	-0.0315172	0.685066	0.136444	0.0873663	0.0102701	0.903107	/	/	1 / 5
FET	SYb	/	/	-0.147479	0.0579398	-0.195689	0.0110184	-0.0888416	0.266977	0.00974284	0.908385	/	/	1 / 4
MaT	SYw	-0.14699	0.06446	-0.25458	0.000933094	-0.10064	0.194287	0.0140405	0.861006	0.00914532	0.913981	/	/	1 / 5
FET	SYw	/	/	-0.183695	0.0178335	-0.174378	0.02378	-0.0438121	0.584654	-0.00528362	0.95024	/	/	2 / 4
FlT	PNb	-0.46785	1.83101e-10	-0.0386084	0.621405	-0.323475	1.89453e-05	0.0756013	0.345118	0.00485405	0.954118	/	/	2 / 5
PD	FET	/	/	-0.115129	0.139664	0.161899	0.0360255	0.0736043	0.358047	0.00465618	0.955986	/	/	1 / 4
BuT	PNb	/	/	-0.0828794	0.288424	-0.327574	1.46201e-05	0.0806693	0.313652	-0.00454286	0.957056	/	/	1 / 4
MIL	BoT	/	/	0.104679	0.179534	0.0689528	0.374478	0.00125728	0.987491	-0.0036152	0.965819	/	/	0 / 4
PBN	FET	/	/	0.015556	0.842324	0.107678	0.164744	-0.0217371	0.786319	0.000301355	0.99715	/	/	0 / 4
Note: Figures with red color indicate significant positive correlation; Figures with green color indicate significant negative correlation.
