# Supplementary material for: Systematic trait dissection in oilseed rape provides a comprehensive view, further insight, and exact roadmap for yield determination
Source: Biotechnol Biofuels Bioprod. 2022 Apr 19;15:38. doi: 10.1186/s13068-022-02134-w (PMC9019968; doi:10.1186/s13068-022-02134-w)
Supplement: Supplementary file 11 — Additional file 11: Table S4. Three principal components (PC1, PC2, and PC3) in the two locations and six environments. [file 13068_2022_2134_MOESM11_ESM.xlsx]

## Sheet: Table S4
Table S4. Three principal components (PC1, PC2, and PC3) in two locations and six environments.
Environment	Group	PC1	PC2	PC3
W12	PNb	-0.376147	0.21103	0.100654
	PNw	-0.355903	0.258922	0.076438
	SYb	-0.228488	0.407778	-0.019786
	PBN	-0.207752	0.211696	0.227655
	MIL	-0.16837	0.143371	-0.18076
	PRO	-0.118752	-0.122746	0.51857
	TSW	-0.079969	-0.032434	0.170239
	SYw	-0.061526	0.491535	-0.01046
	OIL	0.105221	0.098771	-0.523311
	MaT	0.116977	-0.030348	0.387257
	PNm	0.131987	0.299887	0.011126
	PH	0.178435	0.36881	0.115465
	PD	0.226561	0.234821	0.107958
	SNPP	0.276926	0.128147	-0.085982
	PL	0.290867	0.033931	0.1613
	FlT	0.30414	0.066612	0.343509
	PBH	0.305429	0.064846	-0.022869
	SYm	0.333802	0.284713	-0.016197
	Eigenvalue	5.1245	3.31559	2.17367
	Proportion of variance	0.2847	0.1842	0.1208
	Cumulative Proportion	0.2847	0.4689	0.5897
W13	PL	-0.163955	-0.132084	0.230123
	MaT	-0.156451	0.212238	0.020629
	BuT	-0.15595	0.351128	0.265361
	FlT	-0.144279	0.36548	0.24843
	FET	-0.119479	0.348294	0.204657
	PBH	-0.105428	-0.251406	0.130614
	BoT	-0.095196	0.340549	0.161319
	OIL	-0.068247	-0.286376	0.077256
	TSW	-0.05716	-0.161389	-0.216093
	SNPP	-0.018097	-0.152314	0.526326
	PRO	0.018992	0.22653	-0.122875
	MIL	0.044209	0.111233	-0.009674
	SYm	0.072921	-0.265635	0.354188
	PH	0.161953	-0.136561	0.174307
	PD	0.193082	-0.007856	-0.186781
	PNm	0.214776	0.060259	-0.20766
	PBN	0.303332	0.135798	0.107174
	SYw	0.367972	-0.097049	0.300276
	SYb	0.413398	0.003046	0.214768
	PNb	0.414165	0.180181	-0.014866
	PNw	0.416755	0.178804	-0.052918
	Eigenvalue	4.61105	4.20367	2.54336
	Proportion of variance	0.2196	0.2002	0.1211
	Cumulative Proportion	0.2196	0.4197	0.5409
W14	PNb	-0.333731	0.193011	0.287804
	PNw	-0.289626	0.210927	0.325072
	SYb	-0.242047	0.400891	0.025152
	PBN	-0.175114	0.26696	0.223738
	SYw	-0.100743	0.482423	-0.030101
	MIL	-0.071802	-0.042294	-0.011683
	TSW	-0.020218	-0.135622	-0.084048
	OIL	0.015209	0.19817	-0.373669
	PRO	0.016966	-0.234477	0.356729
	PNm	0.119626	0.099264	0.168859
	PH	0.151177	0.222443	0.214493
	SNPP	0.179919	0.332185	-0.193091
	MaT	0.184361	-0.022576	0.283957
	PD	0.201466	0.123973	0.181916
	FET	0.204519	-0.020564	0.322618
	SYm	0.232814	0.344683	-0.183248
	PBH	0.262346	0.118219	0.103111
	PL	0.263771	0.084802	-0.211367
	BoT	0.264923	0.025814	-0.006134
	BuT	0.331246	0.031771	0.18161
	FlT	0.37524	0.107139	0.185189
	Eigenvalue	4.85073	3.69667	2.98322
	Proportion of variance	0.231	0.176	0.1421
	Cumulative Proportion	0.231	0.407	0.5491
W16	PRO	0.094769	0.027803	-0.406171
	MaT	0.182756	0.191515	-0.14579
	PNb	0.359397	-0.248712	-0.108884
	PNw	0.383317	-0.228363	-0.075484
	FET	0.243375	0.376873	-0.073073
	PBN	0.265132	-0.231756	-0.06855
	TSW	-0.123002	-0.142727	-0.059676
	FlT	0.256618	0.385997	-0.049753
	BoT	0.084658	0.366846	-0.031129
	BuT	0.248421	0.365139	-0.002263
	MIL	0.173576	-0.001416	0.022382
	PD	0.117198	-0.063446	0.071763
	PNm	0.226405	-0.061365	0.09229
	SYb	0.310511	-0.275004	0.131916
	PH	0.287121	0.043561	0.157661
	PL	-0.082561	0.124003	0.231454
	PBH	0.077198	0.158949	0.252898
	SYw	0.294492	-0.205919	0.28337
	OIL	-0.154393	-0.113809	0.386851
	SNPP	0.00647	0.170024	0.407582
	SYm	0.069085	0.072859	0.457314
	Eigenvalue	4.75558	3.96827	3.24377
	Proportion of variance	0.2265	0.189	0.1545
	Cumulative Proportion	0.2265	0.4154	0.5699
Z13	FlT	-0.030138	-0.107072	0.501826
	MaT	-0.025778	0.002836	0.172297
	PH	0.145643	0.337173	0.086141
	PNw	0.427537	-0.115322	-0.068767
	SYw	0.431418	0.032145	0.087641
	PBH	-0.162744	0.246802	0.165103
	PBN	0.264702	-0.104764	0.029984
	PNb	0.405772	-0.19546	-0.044635
	SYb	0.429683	-0.070199	0.054524
	MIL	0.114103	0.380565	-0.178201
	PD	0.116246	0.010068	-0.06993
	PL	-0.074685	0.26269	0.276993
	PNm	0.181164	0.249795	-0.189028
	SNPP	0.167893	0.10808	0.237388
	SYm	0.21042	0.375954	0.123082
	TSW	-0.109101	0.221327	0.050691
	PRO	-0.052019	-0.297969	0.133711
	OIL	-0.015184	0.403477	-0.059724
	Eigenvalue	4.46235	3.2639	2.35516
	Proportion of variance	0.2125	0.1554	0.1122
	Cumulative Proportion	0.2125	0.3679	0.4801
Z14	BoT	-0.080861	-0.057855	-0.14421
	BuT	0.0596	0.070445	0.399576
	FET	0.012175	-0.085198	0.490361
	FlT	-0.030138	-0.107072	0.501826
	MaT	-0.025778	0.002836	0.172297
	PH	0.145643	0.337173	0.086141
	PNw	0.427537	-0.115322	-0.068767
	SYw	0.431418	0.032145	0.087641
	PBH	-0.162744	0.246802	0.165103
	PBN	0.264702	-0.104764	0.029984
	PNb	0.405772	-0.19546	-0.044635
	SYb	0.429683	-0.070199	0.054524
	MIL	0.114103	0.380565	-0.178201
	PD	0.116246	0.010068	-0.06993
	PL	-0.074685	0.26269	0.276993
	PNm	0.181164	0.249795	-0.189028
	SNPP	0.167893	0.10808	0.237388
	SYm	0.21042	0.375954	0.123082
	TSW	-0.109101	0.221327	0.050691
	PRO	-0.052019	-0.297969	0.133711
	OIL	-0.015184	0.403477	-0.059724
	Eigenvalue	4.46235	3.2639	2.35516
	Proportion of variance	0.2125	0.1554	0.1122
	Cumulative Proportion	0.2125	0.3679	0.4801
Wuhan	PNb	-0.385612	0.209765	0.174664
	PNw	-0.353357	0.22474	0.165831
	SYb	-0.279651	-0.073051	0.377488
	PBN	-0.220632	0.145729	0.307975
	SYw	-0.118573	-0.185808	0.42879
	MIL	-0.051493	0.06835	-0.168453
	TSW	-0.001174	-0.125697	-0.291472
	OIL	0.005247	-0.378021	0.034573
	PNm	0.01587	0.087888	-0.07097
	PD	0.018335	0.011843	0.026298
	PRO	0.028391	0.31589	-0.201128
	PH	0.084037	-0.016098	0.254596
	MaT	0.097268	0.144779	0.031935
	SNPP	0.190798	-0.212209	0.34584
	PBH	0.244263	-0.163608	0.170586
	BoT	0.247417	0.263783	0.061076
	FET	0.254133	0.348942	0.165296
	SYm	0.260756	-0.285688	0.184169
	PL	0.275453	-0.18856	-0.052098
	BuT	0.314636	0.288589	0.197659
	FlT	0.316498	0.297578	0.196925
	Eigenvalue	4.54453	3.69136	3.29689
	Proportion of variance	0.2164	0.1758	0.157
	Cumulative Proportion	0.2164	0.3922	0.5492
Zhengzhou	PL	-0.166652	0.235043	0.242528
	TSW	-0.153934	0.094453	0.223108
	PBH	-0.147656	0.249782	0.175268
	MaT	-0.105179	-0.090221	0.281299
	PRO	-0.078099	-0.342814	0.199799
	OIL	-0.053564	0.419508	-0.087076
	BoT	-0.051214	-0.024962	-0.172563
	FlT	-0.049373	-0.098917	0.449173
	FET	-0.023508	-0.058024	0.45518
	BuT	0.031163	0.034968	0.419217
	MIL	0.130063	0.36095	-0.064389
	PD	0.13026	-0.15183	0.199004
	SNPP	0.148913	0.247756	-0.020995
	PH	0.159567	0.366558	0.114463
	SYm	0.169687	0.378669	0.198968
	PNm	0.216724	0.121645	0.076556
	PBN	0.296487	-0.056789	-0.039053
	SYb	0.386808	-0.089827	0.095816
	SYw	0.403054	0.041913	0.074932
	PNb	0.410699	-0.154547	0.015377
	PNw	0.417347	-0.112202	0.017022
	Eigenvalue	4.66391	2.91023	2.31256
	Proportion of variance	0.2221	0.1386	0.1101
	Cumulative Proportion	0.2221	0.3607	0.4708
