# Supplementary material for: Systematic trait dissection in oilseed rape provides a comprehensive view, further insight, and exact roadmap for yield determination
Source: Biotechnol Biofuels Bioprod. 2022 Apr 19;15:38. doi: 10.1186/s13068-022-02134-w (PMC9019968; doi:10.1186/s13068-022-02134-w)
Supplement: Supplementary file 17 — Additional file 17: Table S10. The DEGs identified by RNA-seq of SAM in the initial stage of floral bud differentiation between Zhongshuang11 and No.73290. [file 13068_2022_2134_MOESM17_ESM.xlsx]

## Sheet: Table S10
Table S10. The DEGs identified by RNA-seq of SAM in the initial stage of floral bud differentiation between Zhongshuang11 and No.73290.
Damor_V4	RNA_ID	Zhongshuang11_HZAU	Zhongshuang11 Expression	No.73290 Expression	Zhongshuang11 RPKM	No.73290 RPKM	log2_Ratio (No.73290/Zhongshuang11)	Up-Down Regulation	P-value	FDR
BnaC09g12740D	GSBRNA2T00000015001	BnaC09G0161200ZS	60	13	0.649327	0.142207	-2.19095	Down	1.80643e-08	6.89821e-08
BnaC09g12700D	GSBRNA2T00000019001	BnaC09G0160900ZS	36	9	1.58582	0.400737	-1.9845	Down	4.72546e-05	0.000135314
BnaC09g12250D	GSBRNA2T00000097001	BnaC09G0155400ZS	1132	384	3.51001	1.20353	-1.5442	Down	4.56036e-84	8.86948e-83
BnaC09g12100D	GSBRNA2T00000121001	BnaC09G0153100ZS	151	66	1.05889	0.467826	-1.17851	Down	8.73874e-09	3.41042e-08
BnaA05g26640D	GSBRNA2T00000188001	BnaA05G0425200ZS	6	32	0.0463347	0.249787	2.43053	Up	1.23363e-05	3.74689e-05
BnaA05g26910D	GSBRNA2T00000222001	BnaC05G0480600ZS	95	35	0.707432	0.263447	-1.42508	Down	1.30876e-07	4.69576e-07
BnaA05g27700D	GSBRNA2T00000314001	BnaC05G0488900ZS	154	28	1.07272	0.197145	-2.44394	Down	3.25426e-22	2.27141e-21
BnaA05g28110D	GSBRNA2T00000364001	BnaC06G0163800ZS	1004	4757	12.713	60.8851	2.25979	Up	0	0
BnaA05g28120D	GSBRNA2T00000366001	BnaA05G0447100ZS	449	47	4.10211	0.434034	-3.24049	Down	1.03445e-82	1.98091e-81
BnaA05g28200D	GSBRNA2T00000374001	BnaC05G0494800ZS	340	683	1.48103	3.00726	1.02185	Up	4.14728e-28	3.41177e-27
BnaA05g28240D	GSBRNA2T00000378001	BnaC09G0443700ZS	104	11	4.71405	0.503986	-3.22551	Down	3.492e-20	2.28549e-19
BnaA05g28350D	GSBRNA2T00000391001	BnaA05G0449100.1ZS	183	417	0.593929	1.36799	1.2037	Up	1.11061e-22	7.86187e-22
BnaA05g28470D	GSBRNA2T00000405001	BnaC05G0498400ZS	2563	11917	9.56185	44.9392	2.23261	Up	0	0
BnaA05g28500D	GSBRNA2T00000409001	Bnascaffold3002G0000100ZS	0	15	0.001	0.149592	7.22488	Up	2.79984e-05	8.21302e-05
BnaC04g19340D	GSBRNA2T00000428001	BnaC04G0241000ZS	7	73	0.108382	1.14247	3.39797	Up	2.20528e-15	1.20905e-14
BnaC04g19360D	GSBRNA2T00000435001	BnaC06G0058900ZS	1	48	0.0721752	3.50182	5.60046	Up	6.99426e-14	3.60444e-13
BnaC04g19380D	GSBRNA2T00000446001	BnaC04G0241300ZS	22	0	0.273044	0.001	-8.09299	Down	2.69676e-07	9.44471e-07
BnaC04g19410D	GSBRNA2T00000450001	BnaA03G0587800.1ZS	540	241	2.06131	0.92989	-1.14843	Down	1.25744e-26	9.94494e-26
BnaC04g19530D	GSBRNA2T00000468001	BnaC03G0458400ZS	0	343	0.001	6.53222	12.6734	Up	8.75424e-105	2.04945e-103
BnaC04g19630D	GSBRNA2T00000484001	BnaC04G0243400ZS	271	60	2.05723	0.460393	-2.15976	Down	6.9243e-33	6.39353e-32
BnaC04g19660D	GSBRNA2T00000494001		42	0	0.517161	0.001	-9.01447	Down	2.86262e-13	1.43538e-12
BnaC04g19890D	GSBRNA2T00000539001	BnaC04G0245700ZS	12	54	0.150526	0.684681	2.18542	Up	8.1247e-08	2.96485e-07
BnaC03g54930D	GSBRNA2T00000570001	BnaC03G0600400ZS	303	62	3.30195	0.682943	-2.27348	Down	6.95298e-39	7.28201e-38
BnaC03g54810D	GSBRNA2T00000614001	BnaC03G0598400ZS	255	116	1.45447	0.668788	-1.12088	Down	6.42568e-13	3.16867e-12
BnaC03g54670D	GSBRNA2T00000638001	BnaA04G0126100ZS	17	1	1.04253	0.0619876	-4.07197	Down	8.36096e-05	0.000232957
BnaA06g24730D	GSBRNA2T00000681001	BnaC02G0085400ZS	1	75	0.0312759	2.37103	6.24431	Up	6.89198e-22	4.76781e-21
BnaA06g24600D	GSBRNA2T00000695001	BnaA06G0306000ZS	268	99	0.729711	0.272468	-1.42124	Down	7.0269e-19	4.39844e-18
BnaA06g24380D	GSBRNA2T00000721001	BnaA08G0037900ZS	0	152	0.001	3.84422	11.9085	Up	7.68472e-47	9.28128e-46
BnaA06g24050D	GSBRNA2T00000781001	BnaA06G0300800ZS	0	1012	0.001	8.01161	12.9679	Up	8e-308	5.91315e-306
BnaC08g11010D	GSBRNA2T00000848001		0	16	0.001	0.361299	8.49705	Up	1.3924e-05	4.20871e-05
BnaC08g11090D	GSBRNA2T00000867001	BnaC08G0155400ZS	32	0	0.316718	0.001	-8.30706	Down	2.77844e-10	1.19164e-09
BnaC08g11180D	GSBRNA2T00000885001	BnaC08G0156600ZS	25	436	0.135277	2.3847	4.13982	Up	2.65942e-99	5.95591e-98
BnaC08g11430D	GSBRNA2T00000933001		2	47	0.0962336	2.28591	4.57008	Up	1.76844e-12	8.52904e-12
BnaC08g11440D	GSBRNA2T00000934001	BnaA08G0176100ZS	4789	9587	21.4176	43.3385	1.01685	Up	0	0
BnaC08g11580D	GSBRNA2T00000958001	BnaC08G0161600ZS	81	14	0.545981	0.0953861	-2.517	Down	1.04429e-12	5.09282e-12
BnaC08g11730D	GSBRNA2T00000977001		0	78	0.001	2.73985	11.4199	Up	2.16226e-24	1.60795e-23
BnaC08g11740D	GSBRNA2T00000978001	BnaC09G0368900ZS	0	573	0.001	7.45458	12.8639	Up	1.47038e-174	5.82773e-173
BnaC08g11780D	GSBRNA2T00000983001	BnaC08G0161200ZS	1730	790	10.3324	4.76922	-1.11535	Down	6.79922e-78	1.23738e-76
BnaC08g12050D	GSBRNA2T00001030001	BnaC08G0165000ZS	34	0	0.145469	0.001	-7.18457	Down	7.02092e-11	3.116e-10
BnaC01g31030D	GSBRNA2T00001082001	BnaC04G0276000ZS	0	34	0.001	0.756947	9.56405	Up	4.8209e-11	2.16131e-10
BnaC01g31000D	GSBRNA2T00001088001	BnaC01G0361800ZS	49	4	1.15808	0.0955577	-3.59921	Down	4.86918e-11	2.18096e-10
BnaC01g30940D	GSBRNA2T00001103001	BnaC01G0361200ZS	390	17	2.76799	0.121959	-4.50437	Down	1.13072e-92	2.38859e-91
BnaC01g30800D	GSBRNA2T00001126001	BnaC01G0358400ZS	6	36	0.0292602	0.177457	2.60046	Up	1.38178e-06	4.57677e-06
BnaC01g30790D	GSBRNA2T00001127001	BnaC08G0237700ZS	3	65	0.0395898	0.867042	4.4529	Up	1.32202e-16	7.62062e-16
BnaC01g30780D	GSBRNA2T00001128001	BnaC01G0358400ZS	1	17	0.0136775	0.235029	4.10296	Up	6.95806e-05	0.000195653
BnaC01g30750D	GSBRNA2T00001133001	BnaA04G0021600ZS	1490	573	15.7792	6.13362	-1.36321	Down	1.23511e-91	2.58232e-90
BnaC01g30690D	GSBRNA2T00001146001	BnaA03G0516600ZS	12	62	0.268719	1.40338	2.38473	Up	1.28362e-09	5.28222e-09
BnaC01g30560D	GSBRNA2T00001176001	BnaC01G0356700ZS	383	1639	1.10879	4.79619	2.1129	Up	1.45273e-187	6.175e-186
BnaC01g30550D	GSBRNA2T00001177001	BnaC01G0356400ZS	592	24	5.80418	0.237846	-4.60899	Down	7.65968e-142	2.42291e-140
BnaC01g30540D	GSBRNA2T00001179001	BnaC01G0356400ZS	1292	3768	0.756855	2.23114	1.55969	Up	7.25778e-283	4.78133e-281
BnaC08g09960D	GSBRNA2T00001197001		13	0	0.0691475	0.001	-6.1116	Down	0.000131576	0.000358511
BnaC08g10220D	GSBRNA2T00001243001	BnaC08G0133600ZS	570	261	3.85038	1.78211	-1.11142	Down	1.15651e-26	9.15258e-26
BnaA02g05210D	GSBRNA2T00001310001	BnaC02G0105900ZS	359	11	1.07858	0.0334054	-5.01291	Down	1.09922e-90	2.28258e-89
BnaA02g05290D	GSBRNA2T00001321001	BnaA02G0088300ZS	305	709	0.924039	2.17121	1.23247	Up	8.66526e-39	9.06366e-38
BnaA02g05390D	GSBRNA2T00001334001	BnaA02G0089300ZS	89	259	0.769647	2.26395	1.55657	Up	5.81574e-21	3.90537e-20
BnaA02g05400D	GSBRNA2T00001336001	BnaA02G0089400ZS	130	37	1.94539	0.559668	-1.79742	Down	2.65692e-13	1.33425e-12
BnaA02g05410D	GSBRNA2T00001337001	BnaA02G0089500ZS	5036	841	29.4586	4.97265	-2.5666	Down	0	0
BnaA02g05440D	GSBRNA2T00001341001	BnaC02G0108300ZS	653	2100	6.68152	21.7193	1.70073	Up	2.43552e-179	9.89909e-178
BnaA02g05500D	GSBRNA2T00001352001	BnaA02G0090600ZS	25	5	0.479692	0.0969745	-2.30643	Down	0.000215518	0.000572635
BnaA02g05600D	GSBRNA2T00001362001	BnaA02G0091600ZS	36	93	0.47709	1.24579	1.38473	Up	2.7128e-07	9.49771e-07
BnaA02g05660D	GSBRNA2T00001368001	BnaC02G0111000ZS	4501	9096	36.916	75.4086	1.03048	Up	0	0
BnaA02g05810D	GSBRNA2T00001386001	BnaC02G0112700ZS	171	55	2.53069	0.822753	-1.621	Down	6.05494e-15	3.26614e-14
BnaA02g05820D	GSBRNA2T00001387001	BnaA02G0093500ZS	641	1337	4.58412	9.66482	1.0761	Up	5.71278e-58	8.11622e-57
BnaA02g06330D	GSBRNA2T00001454001	BnaA10G0140600ZS	2	898	0.0104369	4.73678	8.82607	Up	3.83802e-268	2.41144e-266
BnaA02g06440D	GSBRNA2T00001469001	BnaC02G0120500ZS	54	19	0.274618	0.0976683	-1.49146	Down	4.11346e-05	0.000118558
BnaA02g06480D	GSBRNA2T00001473001	BnaA02G0100000ZS	5	30	0.0396232	0.240307	2.60046	Up	1.12044e-05	3.41712e-05
BnaA02g06620D	GSBRNA2T00001489001	BnaC02G0122600ZS	111	382	1.39423	4.84997	1.79851	Up	1.0927e-36	1.09873e-35
BnaA02g06780D	GSBRNA2T00001506001	BnaC02G0123500ZS	735	168	14.5492	3.36145	-2.11379	Down	4.33922e-84	8.44386e-83
BnaC03g62950D	GSBRNA2T00001525001	BnaC03G0707800ZS	54	20	1.4946	0.559534	-1.41746	Down	7.87228e-05	0.000219994
BnaC03g63040D	GSBRNA2T00001552001	BnaC03G0709600ZS	291	583	1.19701	2.42404	1.01797	Up	4.35324e-24	3.20893e-23
BnaC03g63400D	GSBRNA2T00001615001	BnaC02G0310300ZS	0	181	0.001	2.57751	11.3318	Up	1.22444e-55	1.68981e-54
BnaC03g63470D	GSBRNA2T00001624001	BnaA10G0212800ZS	18	0	0.246915	0.001	-7.94787	Down	4.22334e-06	1.34073e-05
BnaC01g26640D	GSBRNA2T00001674001	BnaC01G0312000ZS	18	75	0.217362	0.915454	2.07439	Up	8.60342e-10	3.58446e-09
BnaC01g27040D	GSBRNA2T00001770001	BnaA10G0078300ZS	0	19	0.001	0.417125	8.70434	Up	1.7126e-06	5.62983e-06
BnaA06g34130D	GSBRNA2T00001798001	BnaA06G0402700ZS	5	25	0.117579	0.594242	2.33742	Up	0.000171248	0.000460059
BnaA06g34150D	GSBRNA2T00001800001	BnaA06G0402900ZS	49	183	0.364886	1.37745	1.91649	Up	6.7523e-20	4.38179e-19
BnaA06g34210D	GSBRNA2T00001808001	BnaC07G0277500ZS	133	663	1.21274	6.11075	2.33308	Up	7.60168e-87	1.52497e-85
BnaA06g34320D	GSBRNA2T00001821001	BnaA06G0404100ZS	21254	59324	339.73	958.492	1.49638	Up	0	0
BnaA06g34330D	GSBRNA2T00001822001	BnaC07G0275700ZS	0	22	0.001	0.128956	7.01073	Up	2.10646e-07	7.44168e-07
BnaA06g34400D	GSBRNA2T00001832001	BnaA06G0405000ZS	510	1253	1.41533	3.51481	1.31231	Up	6.01598e-74	1.05327e-72
BnaA06g34410D	GSBRNA2T00001835001	BnaA06G0405200ZS	45	7	1.03487	0.162717	-2.669	Down	4.94094e-08	1.83194e-07
BnaA06g34460D	GSBRNA2T00001840001	BnaA06G0405700ZS	1	163	0.00925323	1.52456	7.36422	Up	2.95086e-48	3.65051e-47
BnaA06g34530D	GSBRNA2T00001848001	BnaA06G0406200ZS	1324	383	6.09858	1.78322	-1.77399	Down	4.26922e-119	1.12399e-117
BnaA06g34540D	GSBRNA2T00001849001	BnaA06G0406300ZS	2377	555	7.74674	1.8283	-2.08309	Down	8.25014e-263	5.02429e-261
BnaA06g34550D	GSBRNA2T00001850001	BnaA06G0406400ZS	304	76	1.7629	0.445483	-1.9845	Down	4.49302e-33	4.16593e-32
BnaA06g34560D	GSBRNA2T00001851001	BnaA06G0406500ZS	91	19	2.1616	0.456197	-2.24437	Down	1.66473e-12	8.04106e-12
BnaA06g34570D	GSBRNA2T00001852001	BnaA06G0406900ZS	541	225	4.14374	1.74198	-1.25021	Down	2.81384e-30	2.44657e-29
BnaA06g34610D	GSBRNA2T00001856001	BnaA06G0407200ZS	301	16	4.64509	0.249582	-4.21812	Down	6.51468e-69	1.06696e-67
BnaA06g34670D	GSBRNA2T00001862001	BnaA06G0407600ZS	5084	2434	21.3432	10.3285	-1.04714	Down	2.11832e-203	9.86169e-202
BnaA06g34860D	GSBRNA2T00001885001	BnaC07G0268600ZS	1258	5465	13.5673	59.5754	2.13459	Up	0	0
BnaA06g34920D	GSBRNA2T00001892001	BnaA06G0410600ZS	64	19	2.41164	0.723687	-1.73658	Down	6.09666e-07	2.07735e-06
BnaA06g34950D	GSBRNA2T00001896001	BnaA06G0410900ZS	1	34	0.0157959	0.542861	5.10296	Up	8.96396e-10	3.73064e-09
BnaA06g35000D	GSBRNA2T00001901001	BnaA06G0411200ZS	2	30	0.0173274	0.262718	3.92239	Up	1.11851e-07	4.03785e-07
BnaA06g35060D	GSBRNA2T00001907001	BnaC07G0265400ZS	75	363	0.487333	2.38416	2.2905	Up	2.78798e-47	3.39179e-46
BnaA06g35200D	GSBRNA2T00001924001	BnaA06G0413400ZS	647	1302	1.84518	3.75328	1.02439	Up	2.91954e-52	3.83912e-51
BnaA06g35250D	GSBRNA2T00001929001	BnaC07G0262600ZS	118	856	0.933531	6.84519	2.87432	Up	9.03628e-141	2.84242e-139
BnaA06g35280D	GSBRNA2T00001934001	BnaA06G0414100ZS	16	44	0.199104	0.553449	1.47493	Up	0.00022482	0.000596119
BnaA06g35330D	GSBRNA2T00001939001	BnaA06G0414600ZS	1469	151	11.0532	1.14844	-3.26672	Down	1.13208e-268	7.13122e-267
BnaA06g35460D	GSBRNA2T00001952001	BnaA06G0415600ZS	5172	2504	109.051	53.3667	-1.03099	Down	9.88248e-202	4.54588e-200
BnaA06g35490D	GSBRNA2T00001955001	BnaA06G0415900ZS	562	236	3.39107	1.43939	-1.23629	Down	7.15954e-31	6.3172e-30
BnaC08g21600D	GSBRNA2T00001994001	BnaC08G0304300ZS	278	758	1.92787	5.31334	1.46261	Up	2.88468e-53	3.8527e-52
BnaC08g21710D	GSBRNA2T00002010001	BnaC06G0065400ZS	0	240	0.001	6.27048	12.6144	Up	1.54592e-73	2.69436e-72
BnaC08g21720D	GSBRNA2T00002011001	BnaC06G0065400ZS	0	19	0.001	0.238357	7.89698	Up	1.7126e-06	5.63134e-06
BnaC08g21820D	GSBRNA2T00002022001	BnaC08G0306000ZS	238	0	1.80672	0.001	-10.8192	Down	8.14336e-72	1.38698e-70
BnaC08g21940D	GSBRNA2T00002045001	BnaC02G0511800ZS	8	469	0.0572994	3.39545	5.88894	Up	1.37978e-128	3.969e-127
BnaC08g04130D	GSBRNA2T00002072001	BnaC08G0054800ZS	34	71	0.221231	0.46697	1.07778	Up	0.000229742	0.000607369
BnaC04g03300D	GSBRNA2T00002232001	BnaC04G0046100ZS	1675	828	16.1855	8.08737	-1.00096	Down	1.5155e-63	2.32374e-62
BnaC04g03140D	GSBRNA2T00002250001	BnaC01G0303400ZS	0	237	0.001	1.39006	10.4409	Up	1.25688e-72	2.1669e-71
BnaC04g03060D	GSBRNA2T00002260001	BnaC04G0044000ZS	210	80	0.963042	0.370835	-1.37682	Down	1.78505e-14	9.44272e-14
BnaC04g02990D	GSBRNA2T00002269001	BnaC04G0042400ZS	11	108	0.195845	1.94361	3.31095	Up	1.14171e-21	7.84864e-21
BnaC04g02760D	GSBRNA2T00002298001	BnaC04G0040000ZS	5996	1898	14.3812	4.60144	-1.64402	Down	0	0
BnaC04g02750D	GSBRNA2T00002303001	BnaC04G0039900ZS	158	30	1.21415	0.233025	-2.38139	Down	4.0789e-22	2.84159e-21
BnaC03g30200D	GSBRNA2T00002311001	BnaA03G0266400ZS	0	87	0.001	0.727616	9.50703	Up	4.02336e-27	3.23151e-26
BnaC03g30230D	GSBRNA2T00002315001	BnaC03G0319100ZS	730	3165	3.50713	15.3698	2.13173	Up	0	0
BnaC03g30320D	GSBRNA2T00002327001	BnaC03G0320700ZS	0	51	0.001	0.346234	8.4356	Up	3.3563e-16	1.90328e-15
BnaC03g30370D	GSBRNA2T00002334001	BnaC03G0321100ZS	0	130	0.001	1.07774	10.0738	Up	3.6286e-40	3.89204e-39
BnaC03g30400D	GSBRNA2T00002338001	BnaC01G0160700ZS	68	807	0.610554	7.32409	3.58446	Up	2.76204e-163	1.01463e-161
BnaC03g30570D	GSBRNA2T00002363001	BnaA03G0268800ZS	104	0	1.02072	0.001	-9.99537	Down	8.65212e-32	7.78595e-31
BnaC03g30600D	GSBRNA2T00002367001	BnaC03G0323100ZS	1890	4168	15.0283	33.4998	1.15647	Up	2.82116e-198	1.26595e-196
BnaC03g30630D	GSBRNA2T00002371001	BnaA03G0269400ZS	1	18	0.00388521	0.070689	4.18542	Up	3.63346e-05	0.000105261
BnaC03g30680D	GSBRNA2T00002378001	BnaC03G0323400ZS	266	874	1.46554	4.86735	1.7317	Up	1.21991e-77	2.21349e-76
BnaC03g30690D	GSBRNA2T00002379001	BnaC03G0323400ZS	42	127	0.279487	0.854242	1.61186	Up	1.64871e-11	7.56828e-11
BnaC03g30700D	GSBRNA2T00002380001	BnaC03G0323600ZS	246	18	9.94898	0.735836	-3.75709	Down	4.45758e-52	5.84588e-51
BnaC03g30710D	GSBRNA2T00002382001	BnaC03G0323700ZS	49	2	0.339805	0.0140194	-4.59921	Down	7.92222e-13	3.88627e-12
BnaC03g30920D	GSBRNA2T00002412001	BnaC03G0325300ZS	63	125	1.09466	2.19539	1.004	Up	3.77988e-06	1.20501e-05
BnaC03g30930D	GSBRNA2T00002413001	BnaC03G0325300ZS	240	532	1.82633	4.09209	1.16389	Up	4.24818e-27	3.40873e-26
BnaC07g04320D	GSBRNA2T00002464001	BnaC07G0081500ZS	9	154	0.046322	0.80118	4.11236	Up	7.81096e-36	7.68859e-35
BnaC07g04180D	GSBRNA2T00002496001	BnaC07G0083100ZS	12	0	0.067705	0.001	-6.08119	Down	0.000261746	0.000687466
BnaA01g23230D	GSBRNA2T00002537001	BnaA01G0285700ZS	37	4	0.294705	0.0322041	-3.19396	Down	6.7894e-08	2.49184e-07
BnaA01g23260D	GSBRNA2T00002540001	BnaA06G0156800ZS	0	39	0.001	1.3163	10.3623	Up	1.46651e-12	7.10183e-12
BnaA01g23310D	GSBRNA2T00002546001	BnaA01G0286200ZS	434	194	4.99035	2.2548	-1.14614	Down	1.2035e-21	8.26569e-21
BnaA01g23420D	GSBRNA2T00002566001	BnaA01G0287200ZS	303	798	1.07363	2.85812	1.41257	Up	3.2168e-53	4.29158e-52
BnaA01g23480D	GSBRNA2T00002579001	BnaA01G0287900ZS	3861	7661	20.398	40.9109	1.00405	Up	1.35843e-288	9.21406e-287
BnaA01g23490D	GSBRNA2T00002580001	BnaC02G0351300ZS	11	92	0.0550163	0.465105	3.07963	Up	1.59627e-17	9.54366e-17
BnaA01g23570D	GSBRNA2T00002590001	BnaA10G0060600ZS	0	13	0.001	0.104841	6.71206	Up	0.000113206	0.000310837
BnaA01g23580D	GSBRNA2T00002591001	BnaA01G0288900ZS	35	0	0.555664	0.001	-9.11807	Down	3.52932e-11	1.59387e-10
BnaA01g23690D	GSBRNA2T00002612001	BnaC01G0356300ZS	2	322	0.0434388	7.06917	7.34641	Up	2.7517e-94	5.90295e-93
BnaA01g23770D	GSBRNA2T00002624001	BnaC01G0357100ZS	165	21	1.01519	0.130601	-2.95851	Down	7.90232e-29	6.62121e-28
BnaA01g23780D	GSBRNA2T00002625001		42	9	1.96058	0.424661	-2.2069	Down	2.45046e-06	7.95022e-06
BnaA01g23840D	GSBRNA2T00002639001	BnaA01G0291900ZS	5	25	0.0177167	0.0895402	2.33742	Up	0.000171248	0.000460043
BnaA01g23870D	GSBRNA2T00002643001	BnaA01G0292300ZS	113	938	0.731714	6.13947	3.06876	Up	1.47121e-164	5.45091e-163
BnaC05g01850D	GSBRNA2T00002686001	BnaA09G0700000ZS	51	18	0.302097	0.107774	-1.487	Down	7.04978e-05	0.000198081
BnaC05g02040D	GSBRNA2T00002707001	BnaC01G0362400ZS	12	514	0.0504903	2.18602	5.43616	Up	2.62074e-136	7.99337e-135
BnaC05g02050D	GSBRNA2T00002708001	BnaC05G0022600ZS	0	117	0.001	0.654655	9.35459	Up	3.18808e-36	3.17177e-35
BnaC05g02560D	GSBRNA2T00002763001	BnaA10G0026200ZS	993	2712	4.79028	13.2241	1.46499	Up	2.8683e-186	1.21217e-184
BnaC05g02780D	GSBRNA2T00002785001	BnaC05G0030600ZS	3266	8131	23.4104	58.9116	1.3314	Up	0	0
BnaC09g30490D	GSBRNA2T00002849001	BnaA09G0567500ZS	101	208	0.638155	1.32841	1.05772	Up	4.59754e-10	1.94791e-09
BnaC09g30680D	GSBRNA2T00002892001	BnaC09G0366600ZS	86	268	0.649171	2.04484	1.65532	Up	1.6735e-23	1.21251e-22
BnaC09g30740D	GSBRNA2T00002904001	BnaC02G0169700ZS	745	89	7.1183	0.859557	-3.04987	Down	1.67249e-128	4.80722e-127
BnaC09g30840D	GSBRNA2T00002921001	BnaC09G0527700ZS	0	58	0.001	0.758728	9.56744	Up	2.5251e-18	1.55195e-17
BnaC09g30920D	GSBRNA2T00002934001	BnaC09G0370200ZS	199	499	1.48779	3.77097	1.34177	Up	1.76598e-31	1.57757e-30
BnaA06g39780D	GSBRNA2T00002951001	BnaA06G0398200ZS	1590	455	8.33908	2.41211	-1.78959	Down	2.31848e-144	7.47244e-143
BnaA06g39810D	GSBRNA2T00002955001	BnaA06G0397900ZS	14	79	0.123458	0.704177	2.51192	Up	1.48219e-12	7.17399e-12
BnaA06g39830D	GSBRNA2T00002957001	BnaA06G0397700ZS	7932	2586	108.018	35.5964	-1.60147	Down	0	0
BnaCnng20400D	GSBRNA2T00003032001	BnaC06G0201200ZS	92	513	0.648547	3.65541	2.49475	Up	5.03792e-73	8.72244e-72
BnaA06g23550D	GSBRNA2T00003092001	BnaA10G0052200ZS	63	1415	0.643216	14.6028	4.5048	Up	0	0
BnaA06g23480D	GSBRNA2T00003102001	BnaA06G0295000ZS	1562	750	8.37959	4.06694	-1.04294	Down	2.09138e-63	3.19938e-62
BnaA06g23470D	GSBRNA2T00003103001	BnaA06G0294900ZS	573	181	7.48793	2.39084	-1.64705	Down	1.68658e-47	2.05869e-46
BnaCnng20570D	GSBRNA2T00003129001	BnaA10G0284600ZS	0	849	0.001	12.1448	13.5681	Up	2.7396e-258	1.62389e-256
BnaCnng20610D	GSBRNA2T00003133001	BnaC09G0602800ZS	1	4111	0.00291481	12.1122	12.0208	Up	0	0
BnaCnng68210D	GSBRNA2T00003142001	BnaA09G0316300ZS	3008	17106	18.778	107.941	2.52312	Up	0	0
BnaAnng33530D	GSBRNA2T00003146001	BnaC04G0363800ZS	4	240	0.0355072	2.15344	5.92239	Up	1.46984e-66	2.34085e-65
BnaUnng03830D	GSBRNA2T00003166001	BnaA02G0324100ZS	118	693	3.20918	19.0507	2.56956	Up	2.33626e-101	5.31993e-100
BnaCnng68300D	GSBRNA2T00003199001	BnaC02G0205300ZS	164	384	0.894117	2.11615	1.24291	Up	5.13218e-22	3.56452e-21
BnaA10g03490D	GSBRNA2T00003213001	BnaA10G0039900ZS	129	61	1.23256	0.589135	-1.06499	Down	9.62876e-07	3.22939e-06
BnaC02g45710D	GSBRNA2T00003242001	Bnascaffold2873G0000100ZS	165	1712	1.0496	11.008	3.39064	Up	0	0
BnaC02g45750D	GSBRNA2T00003251001	BnaC02G0212900ZS	291	600	3.51401	7.32363	1.05944	Up	2.61786e-26	2.05096e-25
BnaA04g28580D	GSBRNA2T00003271001	BnaC04G0494200ZS	12	283	0.15298	3.64674	4.57519	Up	2.8533e-69	4.70458e-68
BnaA04g28630D	GSBRNA2T00003276001	BnaA04G0190100ZS	499	1114	5.41272	12.2142	1.17413	Up	1.17317e-55	1.61997e-54
BnaC02g46170D	GSBRNA2T00003298001		12	0	0.0516957	0.001	-5.69197	Down	0.000261746	0.000687664
BnaC08g46220D	GSBRNA2T00003311001	BnaC08G0006400ZS	45	93	0.381759	0.797488	1.0628	Up	2.99484e-05	8.75561e-05
BnaC08g46300D	GSBRNA2T00003320001	BnaC08G0005600ZS	152	63	1.10557	0.463177	-1.25515	Down	1.30493e-09	5.36693e-09
BnaA06g01390D	GSBRNA2T00003340001	BnaC06G0083100ZS	198585	73521	1342.42	502.364	-1.41803	Down	0	0
BnaA04g26960D	GSBRNA2T00003354001	BnaA04G0297500ZS	210	729	0.518932	1.82089	1.81103	Up	3.99824e-69	6.57316e-68
BnaA04g26990D	GSBRNA2T00003358001	BnaA04G0298100ZS	532	3635	6.45749	44.5986	2.78795	Up	0	0
BnaA04g27050D	GSBRNA2T00003368001	BnaA04G0298800ZS	73	25	0.722514	0.250108	-1.53047	Down	1.11066e-06	3.70723e-06
BnaC06g42990D	GSBRNA2T00003394001	BnaC06G0241800ZS	1803	7149	13.6209	54.5909	2.00284	Up	0	0
BnaAnng33730D	GSBRNA2T00003444001	BnaC09G0228400ZS	175	608	0.7288	2.5594	1.81221	Up	5.4332e-58	7.72201e-57
BnaA05g36690D	GSBRNA2T00003493001	BnaA05G0344200ZS	668	1346	2.72983	5.55993	1.02625	Up	4.00268e-54	5.40893e-53
BnaA05g36740D	GSBRNA2T00003498001	BnaA05G0344800ZS	55	141	0.707891	1.83437	1.37369	Up	2.91146e-10	1.24746e-09
BnaC09g35950D	GSBRNA2T00003502001	BnaC09G0437800ZS	40	11	0.376818	0.104744	-1.847	Down	4.22776e-05	0.000121704
BnaC03g77430D	GSBRNA2T00003559001	BnaC03G0769300ZS	0	24	0.001	0.125756	6.97448	Up	5.20972e-08	1.92896e-07
BnaC06g43410D	GSBRNA2T00003593001	BnaC06G0307300ZS	72	6	0.66689	0.0561743	-3.56947	Down	1.43207e-15	7.9087e-15
BnaC04g02430D	GSBRNA2T00003606001	BnaC04G0035200.1ZS	601	297	1.7088	0.853569	-1.00141	Down	6.81668e-24	4.9957e-23
BnaA05g33240D	GSBRNA2T00003626001	BnaC05G0545500ZS	1568	660	6.88451	2.92911	-1.23289	Down	1.05774e-82	2.02497e-81
BnaA05g33250D	GSBRNA2T00003627001	BnaC05G0545400ZS	178	81	1.16062	0.533851	-1.12039	Down	1.95402e-09	7.95175e-09
BnaA05g33260D	GSBRNA2T00003628001	BnaC05G0545300ZS	3100	821	25.947	6.94598	-1.90132	Down	1.4e-303	1.01435e-301
BnaA05g33270D	GSBRNA2T00003629001	BnaC05G0545200ZS	3971	1681	30.5402	13.0678	-1.22469	Down	2.41274e-204	1.12753e-202
BnaA05g33290D	GSBRNA2T00003631001	BnaA05G0491100ZS	356	175	2.96123	1.47138	-1.00903	Down	6.0722e-15	3.27521e-14
BnaA05g33310D	GSBRNA2T00003633001	Bnascaffold1753G0000100ZS	1913	730	10.5708	4.07738	-1.37437	Down	1.47846e-118	3.87023e-117
BnaA05g33360D	GSBRNA2T00003640001	Bnascaffold2449G0000100ZS	14572	5301	129.968	47.7901	-1.44337	Down	0	0
BnaA05g33370D	GSBRNA2T00003641001	Bnascaffold2448G0000200ZS	7790	3149	40.2932	16.4639	-1.29123	Down	0	0
BnaA05g33430D	GSBRNA2T00003647001	BnaA05G0493100ZS	36435	17685	213.663	104.829	-1.0273	Down	0	0
BnaA05g33440D	GSBRNA2T00003648001	BnaA05G0493200ZS	3478	1390	12.6046	5.09189	-1.30768	Down	2.44508e-198	1.09853e-196
BnaAnng33760D	GSBRNA2T00003658001	BnaC09G0125800.4ZS	1314	3290	5.06323	12.8142	1.33962	Up	3.65206e-197	1.62784e-195
BnaCnng68510D	GSBRNA2T00003678001		28	131	0.47082	2.22655	2.24156	Up	1.36024e-17	8.15311e-17
BnaCnng68540D	GSBRNA2T00003683001	BnaA06G0303000ZS	17	81	0.174898	0.842338	2.26788	Up	1.53185e-11	7.04773e-11
BnaCnng68550D	GSBRNA2T00003694001	BnaC09G0597300ZS	16	87	0.192221	1.05649	2.45844	Up	2.15194e-13	1.08437e-12
BnaA05g34490D	GSBRNA2T00003713001	BnaC04G0050200ZS	2	22	0.0439474	0.488642	3.47493	Up	1.73371e-05	5.18522e-05
BnaCnng68620D	GSBRNA2T00003717001	BnaC05G0535200ZS	74	25	1.96137	0.669781	-1.5501	Down	7.39836e-07	2.50621e-06
BnaC03g73010D	GSBRNA2T00003735001	BnaC01G0354500ZS	259	574	1.26045	2.82359	1.16359	Up	4.24138e-29	3.57748e-28
BnaC06g42510D	GSBRNA2T00003781001	BnaC06G0188100ZS	765	2568	7.53182	25.5563	1.76261	Up	4.87346e-230	2.58005e-228
BnaA07g36740D	GSBRNA2T00003794001	BnaA07G0103200ZS	0	21	0.001	0.360808	8.49509	Up	4.23564e-07	1.46261e-06
BnaCnng21260D	GSBRNA2T00003877001	BnaC07G0376500ZS	15	0	0.180438	0.001	-7.49536	Down	3.32482e-05	9.67174e-05
BnaCnng21270D	GSBRNA2T00003879001	BnaC07G0376700ZS	15500	7069	117.951	54.374	-1.11719	Down	0	0
BnaCnng68630D	GSBRNA2T00003886001	BnaC03G0139700ZS	275	801	1.40308	4.13092	1.55787	Up	1.62943e-61	2.43131e-60
BnaAnng33930D	GSBRNA2T00003921001	BnaA09G0632600ZS	22	0	0.365995	0.001	-8.51568	Down	2.69676e-07	9.44517e-07
BnaAnng33950D	GSBRNA2T00003927001	BnaC03G0022500ZS	48	232	0.372209	1.81844	2.28851	Up	9.3179e-31	8.19892e-30
BnaCnng68680D	GSBRNA2T00003933001	BnaC06G0054300ZS	2	41	0.0211324	0.437892	4.37305	Up	9.07816e-11	4.00504e-10
BnaA09g56140D	GSBRNA2T00003957001	BnaC08G0460400ZS	5	116	0.045994	1.07858	4.55155	Up	4.45024e-29	3.75193e-28
BnaC03g67020D	GSBRNA2T00003995001	BnaC03G0759000.1ZS	80	32	1.85339	0.749361	-1.30643	Down	5.94412e-06	1.86209e-05
BnaC05g50190D	GSBRNA2T00004078001	BnaA06G0129400ZS	102	1010	0.706305	7.06933	3.32321	Up	7.22284e-191	3.13188e-189
BnaA01g37170D	GSBRNA2T00004096001	BnaC01G0445300ZS	7	360	0.0738801	3.84058	5.69999	Up	8.62904e-98	1.90977e-96
BnaA01g37220D	GSBRNA2T00004102001	BnaA01G0357600ZS	12	62	0.0590731	0.308507	2.38473	Up	1.28362e-09	5.28192e-09
BnaA05g32760D	GSBRNA2T00004118001	BnaC05G0550500ZS	451	213	3.99588	1.90757	-1.06678	Down	3.7703e-20	2.46588e-19
BnaA05g32780D	GSBRNA2T00004121001	BnaC05G0552200ZS	3184	1533	8.67948	4.22404	-1.03899	Down	1.57662e-126	4.45309e-125
BnaA05g32820D	GSBRNA2T00004127001	BnaC05G0572700ZS	290	118	1.48852	0.612212	-1.28177	Down	1.46147e-17	8.75273e-17
BnaA05g32850D	GSBRNA2T00004130001	BnaC05G0572400ZS	1341	543	19.5075	7.98429	-1.28879	Down	5.8592e-76	1.04784e-74
BnaCnng68760D	GSBRNA2T00004155001	BnaC04G0203200ZS	251	84	1.50292	0.508401	-1.56373	Down	3.01254e-20	1.97433e-19
BnaA09g53350D	GSBRNA2T00004170001	BnaC09G0211300ZS	179	86	1.23042	0.597533	-1.04206	Down	1.39167e-08	5.35818e-08
BnaAnng34070D	GSBRNA2T00004172001	BnaC06G0279200ZS	0	57	0.001	0.420042	8.71439	Up	5.07748e-18	3.08831e-17
BnaUnng03910D	GSBRNA2T00004176001	BnaC08G0289900ZS	69	248	1.05099	3.81827	1.86117	Up	1.82267e-25	1.3975e-24
BnaC05g49530D	GSBRNA2T00004202001	BnaA06G0098300ZS	1047	4605	2.17677	9.67744	2.15244	Up	0	0
BnaC05g49540D	GSBRNA2T00004203001	BnaC05G0120900ZS	1	146	0.00750022	1.10686	7.20532	Up	3.80444e-43	4.32083e-42
BnaC05g49600D	GSBRNA2T00004212001	BnaC05G0121800ZS	43	6	0.453835	0.0640097	-2.82581	Down	3.98146e-08	1.48551e-07
BnaC03g75970D	GSBRNA2T00004225001	BnaC03G0624500ZS	9	58	0.107573	0.700736	2.70355	Up	2.98408e-10	1.27767e-09
BnaC02g44790D	GSBRNA2T00004240001	BnaC02G0175200ZS	3	30	0.0727347	0.735202	3.33742	Up	6.58068e-07	2.23708e-06
BnaC03g75370D	GSBRNA2T00004245001	BnaC03G0617400ZS	22	706	0.20317	6.59033	5.01959	Up	1.12644e-179	4.59876e-178
BnaC03g75380D	GSBRNA2T00004246001	BnaC05G0307000ZS	0	142	0.001	6.41306	12.6468	Up	8.30452e-44	9.53362e-43
BnaC06g41940D	GSBRNA2T00004258001	BnaA05G0158000ZS	157	321	0.807619	1.66908	1.0473	Up	1.53102e-14	8.12822e-14
BnaC06g42000D	GSBRNA2T00004268001	BnaC06G0134800ZS	159	683	1.82157	7.90921	2.11835	Up	1.71183e-79	3.16322e-78
BnaC04g53170D	GSBRNA2T00004277001	BnaC04G0604000ZS	3169	6611	39.4874	83.2661	1.07634	Up	3.34726e-279	2.17196e-277
BnaC03g15370D	GSBRNA2T00004300001	BnaA01G0308400ZS	66	246	0.491089	1.85019	1.91362	Up	3.52774e-26	2.7538e-25
BnaC03g15460D	GSBRNA2T00004311001	BnaC03G0156300ZS	0	12	0.001	0.0650338	6.02312	Up	0.000227634	0.000602491
BnaCnng68810D	GSBRNA2T00004370001	BnaC09G0400400ZS	135	62	2.68933	1.24844	-1.10712	Down	2.30746e-07	8.12124e-07
BnaAnng34150D	GSBRNA2T00004387001	BnaC09G0189400ZS	37	115	0.642894	2.01976	1.65153	Up	7.09972e-11	3.15021e-10
BnaAnng34160D	GSBRNA2T00004388001	BnaA09G0169600ZS	55	257	0.532562	2.51539	2.23976	Up	4.6187e-33	4.27921e-32
BnaAnng34210D	GSBRNA2T00004415001	BnaC09G0481200ZS	352	827	2.07981	4.93914	1.24781	Up	8.25712e-46	9.80464e-45
BnaC03g77140D	GSBRNA2T00004429001	BnaC03G0750000ZS	100	10	1.07848	0.109013	-3.30643	Down	7.16426e-20	4.64543e-19
BnaC03g73590D	GSBRNA2T00004475001	BnaA10G0068700ZS	121	54	0.652856	0.294503	-1.14848	Down	4.61198e-07	1.58748e-06
BnaC03g73720D	GSBRNA2T00004488001		0	39	0.001	0.543142	9.08519	Up	1.46651e-12	7.1023e-12
BnaC01g41020D	GSBRNA2T00004496001	BnaC01G0128800ZS	106	404	0.821284	3.16398	1.94579	Up	6.96668e-43	7.85028e-42
BnaC01g41070D	GSBRNA2T00004502001	BnaC01G0128300ZS	464	211	4.93606	2.26887	-1.12139	Down	2.69888e-22	1.88916e-21
BnaA08g11700D	GSBRNA2T00004537001	BnaA08G0138900ZS	407	1494	1.92576	7.14536	1.89158	Up	3.4803e-148	1.1526e-146
BnaCnng21440D	GSBRNA2T00004551001	BnaA10G0120700ZS	170	2143	0.575631	7.33469	3.67152	Up	0	0
BnaCnng68980D	GSBRNA2T00004621001	BnaC03G0131700ZS	12	41	0.0771716	0.266517	1.78809	Up	4.41422e-05	0.000126788
BnaAnng34310D	GSBRNA2T00004652001	BnaA02G0385900ZS	72	0	2.35387	0.001	-11.2008	Down	3.13074e-22	2.18603e-21
BnaC06g42860D	GSBRNA2T00004706001	BnaC06G0231400ZS	554	1393	5.38101	13.6764	1.34573	Up	3.57918e-85	7.05663e-84
BnaC06g42870D	GSBRNA2T00004707001	BnaC06G0231300ZS	331	1219	2.52291	9.39165	1.89629	Up	1.16287e-121	3.13476e-120
BnaA08g31530D	GSBRNA2T00004746001	BnaA08G0271400ZS	159	64	0.457346	0.186077	-1.29739	Down	1.91891e-10	8.30288e-10
BnaCnng21640D	GSBRNA2T00004759001	BnaC04G0518800ZS	46	181	0.31666	1.25944	1.99178	Up	1.19512e-20	7.94322e-20
BnaCnng21680D	GSBRNA2T00004764001	BnaA04G0209800ZS	92	199	0.372557	0.81456	1.12856	Up	1.32447e-10	5.7899e-10
BnaAnng34390D	GSBRNA2T00004841001	BnaC03G0284800ZS	201	461	6.10336	14.1494	1.21307	Up	3.3984e-25	2.58513e-24
BnaCnng69080D	GSBRNA2T00004857001		18	99	0.179862	0.999921	2.47493	Up	3.67124e-15	1.9953e-14
BnaA10g29510D	GSBRNA2T00004944001	BnaA10G0142900ZS	430	876	2.27943	4.69383	1.04209	Up	1.07492e-36	1.081e-35
BnaA10g29530D	GSBRNA2T00004947001	BnaA10G0143100ZS	171	370	1.34376	2.93896	1.12902	Up	1.76957e-18	1.09291e-17
BnaA03g55120D	GSBRNA2T00004958001	BnaA03G0018300ZS	25	63	0.311513	0.793491	1.34892	Up	3.47926e-05	0.000101014
BnaA03g55140D	GSBRNA2T00004960001	BnaC01G0214600ZS	79	478	0.54704	3.34568	2.61258	Up	9.55428e-72	1.6254e-70
BnaA03g55150D	GSBRNA2T00004961001	BnaC03G0023300ZS	24	0	0.241617	0.001	-7.91658	Down	6.81448e-08	2.50054e-07
BnaA03g55180D	GSBRNA2T00004964001	BnaA03G0018800ZS	670	239	3.4828	1.25579	-1.47165	Down	3.94274e-47	4.7879e-46
BnaA03g55240D	GSBRNA2T00004970001	BnaA03G0019300ZS	1010	341	2.43364	0.830529	-1.55102	Down	1.11804e-75	1.99509e-74
BnaA03g55250D	GSBRNA2T00004971001	BnaA03G0019400ZS	3429	1391	23.2132	9.51832	-1.28617	Down	1.17523e-190	5.08084e-189
BnaA03g55270D	GSBRNA2T00004974001	BnaA03G0019900ZS	1238	12	21.0433	0.206176	-6.67334	Down	0	0
BnaA03g55280D	GSBRNA2T00004975001	BnaA03G0019600ZS	258	100	2.13283	0.835604	-1.35188	Down	5.21182e-17	3.05497e-16
BnaA02g34680D	GSBRNA2T00004992001	BnaA02G0418000ZS	12	68	0.135818	0.777948	2.518	Up	5.16144e-11	2.30806e-10
BnaC02g48070D	GSBRNA2T00005007001	BnaA02G0337400ZS	1	34	0.0154069	0.52949	5.10296	Up	8.96396e-10	3.73001e-09
BnaC02g48080D	GSBRNA2T00005008001	BnaC02G0452700ZS	22	58	0.427373	1.13888	1.41405	Up	3.88386e-05	0.000112187
BnaAnng11310D	GSBRNA2T00005047001	BnaA08G0178000ZS	60	26	0.513188	0.224783	-1.19095	Down	0.0002715	0.000711963
BnaAnng11320D	GSBRNA2T00005048001	BnaA08G0204000ZS	2	205	0.0128443	1.33076	6.69498	Up	3.52238e-59	5.09914e-58
BnaAnng11340D	GSBRNA2T00005050001	BnaA08G0203800ZS	0	63	0.001	0.982728	9.94065	Up	7.68134e-20	4.97455e-19
BnaCnng69120D	GSBRNA2T00005069001	BnaC09G0359600ZS	1150	257	9.19097	2.07616	-2.1463	Down	4.56582e-133	1.35868e-131
BnaAnng34480D	GSBRNA2T00005077001	BnaA09G0256700ZS	50	19	0.766567	0.294441	-1.38043	Down	0.000198081	0.000528679
BnaCnng69240D	GSBRNA2T00005104001	BnaC02G0552900ZS	1	102	0.00605731	0.624518	6.68792	Up	5.97724e-30	5.15308e-29
BnaC08g20250D	GSBRNA2T00005230001	BnaC08G0281200ZS	15	0	0.0815421	0.001	-6.34947	Down	3.32482e-05	9.67557e-05
BnaC05g52180D	GSBRNA2T00005261001	BnaC05G0461200ZS	3	100	0.0273816	0.922578	5.07439	Up	1.09069e-26	8.64099e-26
BnaCnng69300D	GSBRNA2T00005286001	BnaC08G0268900ZS	0	16	0.001	0.314173	8.29542	Up	1.3924e-05	4.20767e-05
BnaAnng34630D	GSBRNA2T00005302001	BnaA04G0223100ZS	10	35	0.0954504	0.337684	1.82285	Up	0.000135461	0.000368385
BnaA04g22360D	GSBRNA2T00005331001	BnaA04G0250100ZS	63	13	0.38635	0.0805839	-2.26134	Down	3.9821e-09	1.58736e-08
BnaA04g22310D	GSBRNA2T00005336001	BnaA04G0249700ZS	0	34	0.001	0.456095	8.83319	Up	4.8209e-11	2.16052e-10
BnaA04g22280D	GSBRNA2T00005340001	BnaA04G0230900ZS	32	3	0.0946859	0.00897266	-3.39954	Down	2.67056e-07	9.35742e-07
BnaA04g22190D	GSBRNA2T00005355001	BnaC04G0563600ZS	0	29	0.001	0.286499	8.16239	Up	1.58479e-09	6.48517e-09
BnaA04g22150D	GSBRNA2T00005359001	BnaA04G0248000ZS	490	204	2.45859	1.03463	-1.24872	Down	1.58423e-27	1.2844e-26
BnaA04g22080D	GSBRNA2T00005366001	BnaC04G0080200ZS	61	788	0.45935	5.99797	3.70681	Up	6.13376e-164	2.2623e-162
BnaA04g22070D	GSBRNA2T00005367001	BnaC04G0080200ZS	1187	3276	13.3541	37.2541	1.48011	Up	5.04904e-228	2.65765e-226
BnaA04g22000D	GSBRNA2T00005375001	BnaA04G0246800ZS	1	17	0.00891052	0.153115	4.10296	Up	6.95806e-05	0.000195601
BnaA04g21900D	GSBRNA2T00005386001	BnaA04G0246200ZS	274	108	1.52665	0.608244	-1.32765	Down	1.60177e-17	9.57577e-17
BnaA04g21840D	GSBRNA2T00005393001	BnaC04G0560300ZS	111	768	0.783663	5.48066	2.80604	Up	2.31664e-123	6.33817e-122
BnaA04g21830D	GSBRNA2T00005395001	BnaA04G0245300ZS	76	177	0.278987	0.656763	1.23517	Up	7.60062e-11	3.36717e-10
BnaA04g21820D	GSBRNA2T00005396001	BnaA04G0245100ZS	646	147	5.57615	1.28258	-2.12022	Down	2.11564e-74	3.72449e-73
BnaA04g21780D	GSBRNA2T00005400001	BnaA04G0244700ZS	660	285	6.609	2.88471	-1.19601	Down	3.19716e-34	3.03424e-33
BnaA04g21770D	GSBRNA2T00005401001	BnaA04G0244600.1ZS	1600	729	6.03394	2.7789	-1.11859	Down	1.6547e-72	2.84606e-71
BnaA04g21720D	GSBRNA2T00005406001	BnaC09G0601600ZS	0	36	0.001	0.288856	8.17421	Up	1.19231e-11	5.51989e-11
BnaA04g21470D	GSBRNA2T00005436001	BnaC04G0556000ZS	3437	1165	15.43	5.28659	-1.54532	Down	1.36127e-251	7.89033e-250
BnaA04g21460D	GSBRNA2T00005437001	BnaA04G0240900ZS	849	6	10.8825	0.0777385	-7.12916	Down	2.0678e-241	1.15036e-239
BnaA04g21450D	GSBRNA2T00005439001	BnaA04G0240800ZS	128	420	1.05258	3.49108	1.72974	Up	3.86468e-38	3.99845e-37
BnaA04g21430D	GSBRNA2T00005442001	BnaA04G0240600ZS	0	274	0.001	2.31608	11.1775	Up	7.49298e-84	1.45384e-82
BnaA04g21380D	GSBRNA2T00005447001	BnaA04G0240000ZS	770	187	7.48678	1.83785	-2.02632	Down	1.99004e-83	3.84697e-82
BnaA04g21340D	GSBRNA2T00005452001	BnaA04G0239500ZS	290	141	1.62061	0.796461	-1.02486	Down	9.95648e-13	4.86012e-12
BnaA04g21320D	GSBRNA2T00005456001	BnaC04G0554300ZS	167	412	1.60381	3.99944	1.31829	Up	1.30649e-25	1.00488e-24
BnaA04g21170D	GSBRNA2T00005473001	BnaC04G0552600ZS	0	28	0.001	0.344429	8.42806	Up	3.18668e-09	1.27842e-08
BnaA01g27130D	GSBRNA2T00005486001	BnaA01G0330600ZS	1195	579	9.26646	4.53826	-1.02988	Down	5.83718e-48	7.19811e-47
BnaA01g26920D	GSBRNA2T00005514001	BnaC07G0007200ZS	65	30	0.97425	0.45451	-1.09998	Down	0.000373172	0.000963216
BnaA01g26880D	GSBRNA2T00005518001	BnaA03G0579500ZS	0	198	0.001	2.38913	11.2223	Up	8.52454e-61	1.25941e-59
BnaA01g26870D	GSBRNA2T00005519001	BnaA03G0579500ZS	1	96	0.0279249	2.70974	6.60046	Up	3.72526e-28	3.06631e-27
BnaA01g26810D	GSBRNA2T00005534001	BnaA01G0327800ZS	61	333	0.525573	2.9001	2.46414	Up	2.5369e-47	3.08735e-46
BnaA01g26310D	GSBRNA2T00005601001	BnaC05G0030100ZS	174	65	1.49506	0.56453	-1.40508	Down	1.41532e-12	6.86027e-12
BnaA01g26290D	GSBRNA2T00005608001	BnaA01G0322500ZS	98	196	0.171839	0.34739	1.0155	Up	4.90834e-09	1.94674e-08
BnaA09g07950D	GSBRNA2T00005653001	BnaA09G0100800ZS	118	331	0.849707	2.40924	1.50354	Up	3.96294e-25	3.00864e-24
BnaA09g07820D	GSBRNA2T00005671001	BnaA09G0099700ZS	403	188	5.13758	2.42257	-1.08455	Down	1.27399e-18	7.90227e-18
BnaA09g07790D	GSBRNA2T00005675001	BnaA09G0099500ZS	15	0	0.0845803	0.001	-6.40225	Down	3.32482e-05	9.67404e-05
BnaA09g07690D	GSBRNA2T00005688001	BnaA09G0097200ZS	133	787	0.628037	3.75641	2.58043	Up	2.0834e-115	5.29501e-114
BnaA09g07610D	GSBRNA2T00005696001	BnaC09G0095300ZS	19	159	0.081814	0.692048	3.08045	Up	2.68722e-29	2.28129e-28
BnaA09g07540D	GSBRNA2T00005705001	BnaA09G0095700ZS	30	70	0.408539	0.963552	1.23789	Up	4.4026e-05	0.000126479
BnaA09g07410D	GSBRNA2T00005718001	BnaC09G0092800ZS	25	3	0.104812	0.0127133	-3.0434	Down	1.72537e-05	5.16301e-05
BnaA09g07290D	GSBRNA2T00005736001	BnaC09G0090900ZS	120	326	1.19146	3.27176	1.45733	Up	1.0141e-23	7.39796e-23
BnaA09g07280D	GSBRNA2T00005738001	BnaA09G0093600ZS	309	1613	3.1617	16.6825	2.39956	Up	9.73046e-216	4.85682e-214
BnaA09g07270D	GSBRNA2T00005739001	BnaA09G0093500ZS	40	247	0.580079	3.62067	2.64194	Up	2.64376e-38	2.74534e-37
BnaA09g07110D	GSBRNA2T00005761001	BnaA09G0090700ZS	381	116	16.1029	4.95566	-1.70017	Down	1.52755e-33	1.42973e-32
BnaA09g06880D	GSBRNA2T00005791001	BnaA09G0088400ZS	124	52	0.707703	0.299984	-1.23826	Down	6.02238e-08	2.21854e-07
BnaA09g06810D	GSBRNA2T00005798001	BnaC02G0542700ZS	15	45	0.114053	0.345855	1.60046	Up	7.44194e-05	0.000208532
BnaC08g08880D	GSBRNA2T00005818001	BnaC08G0070300ZS	92	43	1.04253	0.492532	-1.0818	Down	2.85526e-05	8.36856e-05
BnaC08g08810D	GSBRNA2T00005829001	BnaA08G0053000ZS	171	360	1.0358	2.20418	1.0895	Up	4.24894e-17	2.49936e-16
BnaC08g08610D	GSBRNA2T00005883001	BnaC08G0072000ZS	41	10	0.254427	0.0627255	-2.02013	Down	1.0787e-05	3.29695e-05
BnaC08g08570D	GSBRNA2T00005906001	BnaC08G0073500ZS	215	88	1.08282	0.447988	-1.27327	Down	2.81806e-13	1.41352e-12
BnaAnng02440D	GSBRNA2T00005937001	BnaC01G0516000ZS	382	141	9.95617	3.71461	-1.42238	Down	2.7615e-26	2.16188e-25
BnaAnng02490D	GSBRNA2T00005945001	BnaC01G0514600ZS	68	349	0.688273	3.57061	2.37512	Up	1.74603e-47	2.13019e-46
BnaAnng02510D	GSBRNA2T00005947001	BnaC01G0514800ZS	2929	262	13.465	1.21746	-3.46727	Down	0	0
BnaAnng02540D	GSBRNA2T00005951001	BnaC01G0515100ZS	299	734	2.58567	6.41597	1.31113	Up	5.4873e-44	6.31824e-43
BnaAnng02570D	GSBRNA2T00005956001	BnaC01G0515500ZS	253	4	1.93941	0.0309938	-5.9675	Down	3.0186e-69	4.97377e-68
BnaAnng02580D	GSBRNA2T00005957001	BnaC01G0515600ZS	32	162	0.117193	0.599697	2.35535	Up	1.19433e-22	8.44557e-22
BnaAnng02700D	GSBRNA2T00005972001	BnaA05G0472300ZS	38	192	0.619003	3.16137	2.35253	Up	1.55599e-26	1.22717e-25
BnaAnng02710D	GSBRNA2T00005973001	BnaA01G0395900ZS	50	358	1.95475	14.1471	2.85546	Up	1.84871e-59	2.68262e-58
BnaAnng02780D	GSBRNA2T00005980001	BnaA01G0396700ZS	534	3148	5.10745	30.4342	2.57502	Up	0	0
BnaAnng02860D	GSBRNA2T00005988001		0	17	0.001	0.590585	9.206	Up	6.9246e-06	2.15579e-05
BnaAnng02880D	GSBRNA2T00005991001	BnaC01G0486000ZS	658	288	2.25406	0.997233	-1.17652	Down	2.74814e-33	2.56038e-32
BnaAnng02910D	GSBRNA2T00005994001	BnaC02G0367600ZS	9	37	0.074664	0.310267	2.05502	Up	2.12358e-05	6.30113e-05
BnaAnng02980D	GSBRNA2T00006006001	BnaC01G0485000ZS	153	31	2.10493	0.431096	-2.2877	Down	1.59757e-20	1.05769e-19
BnaAnng03030D	GSBRNA2T00006013001	BnaC01G0484500ZS	25	131	0.34751	1.84062	2.40506	Up	5.09552e-19	3.2051e-18
BnaC04g04740D	GSBRNA2T00006063001	BnaC04G0063900ZS	99	37	0.271607	0.102606	-1.40441	Down	9.84306e-08	3.57076e-07
BnaC04g04450D	GSBRNA2T00006097001	BnaC04G0061000ZS	3	30	0.0269105	0.272011	3.33742	Up	6.58068e-07	2.23697e-06
BnaC04g04310D	GSBRNA2T00006123001	BnaC04G0059600ZS	6	317	0.0315741	1.68618	5.73887	Up	1.70383e-86	3.40688e-85
BnaC04g04300D	GSBRNA2T00006124001		14	42	0.497572	1.50883	1.60046	Up	0.000131	0.000357127
BnaC04g04270D	GSBRNA2T00006127001	BnaC04G0059400ZS	21	0	0.343871	0.001	-8.42573	Down	5.3647e-07	1.83708e-06
BnaC04g04200D	GSBRNA2T00006137001	BnaC04G0058700ZS	570	215	3.26507	1.24486	-1.39113	Down	3.2804e-37	3.33004e-36
BnaC04g04090D	GSBRNA2T00006150001		0	37	0.001	2.12674	11.0544	Up	5.92954e-12	2.78771e-11
BnaC01g20750D	GSBRNA2T00006231001	BnaC01G0224900ZS	471	227	8.51501	4.14815	-1.03754	Down	4.10196e-20	2.67921e-19
BnaC01g20580D	GSBRNA2T00006254001	BnaA01G0174000ZS	7495	3706	64.755	32.3647	-1.00057	Down	1.81888e-277	1.17814e-275
BnaC01g20480D	GSBRNA2T00006269001	BnaC01G0221300ZS	146	834	0.768735	4.43869	2.52958	Up	1.72472e-119	4.56045e-118
BnaC01g20450D	GSBRNA2T00006277001	BnaC01G0220600ZS	56	21	0.402324	0.152501	-1.39954	Down	6.7895e-05	0.000191053
BnaC01g20420D	GSBRNA2T00006284001	BnaC01G0220100ZS	264	829	1.88656	5.98806	1.66633	Up	6.41614e-70	1.06702e-68
BnaC01g20260D	GSBRNA2T00006306001	BnaC01G0218300ZS	4679	1582	232.286	79.3854	-1.54895	Down	0	0
BnaC01g20160D	GSBRNA2T00006318001	BnaC07G0309600ZS	248	67	5.25266	1.43439	-1.87261	Down	2.3642e-25	1.8063e-24
BnaA04g18300D	GSBRNA2T00006366001	BnaA04G0205500ZS	61	10	1.00412	0.166388	-2.59331	Down	3.5586e-10	1.51693e-09
BnaA04g18520D	GSBRNA2T00006391001	BnaC04G0491200ZS	1	30	0.00559164	0.169561	4.92239	Up	1.30699e-08	5.04301e-08
BnaA04g18550D	GSBRNA2T00006395001	BnaC09G0144000ZS	108	286	0.304215	0.814306	1.42048	Up	2.88978e-20	1.89541e-19
BnaA04g18560D	GSBRNA2T00006396001	BnaA04G0207300ZS	6	93	0.0320414	0.502004	3.96969	Up	1.24779e-21	8.56343e-21
BnaA04g18670D	GSBRNA2T00006408001	BnaC04G0152100ZS	252	95	1.36832	0.521406	-1.39193	Down	2.4555e-17	1.45667e-16
BnaA04g18740D	GSBRNA2T00006416001	BnaC04G0516300ZS	9	207	0.0600605	1.39631	4.53906	Up	8.43712e-51	1.08571e-49
BnaA04g18750D	GSBRNA2T00006418001	BnaA04G0209100ZS	123	5	1.73286	0.071202	-4.60509	Down	1.59359e-30	1.39602e-29
BnaA04g18770D	GSBRNA2T00006420001	BnaC04G0517800ZS	0	199	0.001	1.21528	10.2471	Up	4.23938e-61	6.29494e-60
BnaA04g18780D	GSBRNA2T00006421001		0	179	0.001	1.12651	10.1376	Up	4.9508e-55	6.78012e-54
BnaA04g18820D	GSBRNA2T00006426001	BnaC04G0518800ZS	16	455	0.111039	3.19177	4.84522	Up	3.56248e-114	8.95174e-113
BnaA04g19040D	GSBRNA2T00006454001	BnaC04G0521300ZS	21	139	0.327306	2.18985	2.74212	Up	4.65592e-23	3.33157e-22
BnaA04g19070D	GSBRNA2T00006457001	BnaA04G0211400ZS	0	43	0.001	0.201291	7.65314	Up	8.97036e-14	4.59825e-13
BnaC05g13800D	GSBRNA2T00006472001	BnaC05G0150500ZS	335	700	1.22448	2.58624	1.07869	Up	2.8004e-31	2.49131e-30
BnaC05g13890D	GSBRNA2T00006483001	BnaC05G0151500ZS	0	87	0.001	0.763997	9.57742	Up	4.02336e-27	3.23222e-26
BnaC05g13900D	GSBRNA2T00006484001		87	273	0.468331	1.48546	1.66531	Up	4.1816e-24	3.0852e-23
BnaC05g14100D	GSBRNA2T00006507001	BnaC05G0154400ZS	421	1310	0.926178	2.91305	1.65317	Up	3.23732e-108	7.76989e-107
BnaC05g14630D	GSBRNA2T00006578001	BnaC05G0159200ZS	150	48	0.784076	0.253614	-1.62836	Down	2.32072e-13	1.16765e-12
BnaC01g32130D	GSBRNA2T00006586001	BnaC01G0380600ZS	290	97	2.49176	0.842452	-1.5645	Down	3.58286e-23	2.57177e-22
BnaC01g32070D	GSBRNA2T00006604001	BnaC01G0380100ZS	4	87	0.0132012	0.290228	4.45844	Up	7.50828e-22	5.18536e-21
BnaC01g31970D	GSBRNA2T00006617001		522	1142	6.34431	14.0296	1.14494	Up	7.84766e-55	1.07133e-53
BnaC01g31890D	GSBRNA2T00006630001	BnaC01G0378600ZS	0	58	0.001	0.368191	8.52431	Up	2.5251e-18	1.55221e-17
BnaC01g31820D	GSBRNA2T00006654001	BnaC01G0377400ZS	71	419	0.4588	2.7368	2.57656	Up	3.827e-62	5.76314e-61
BnaC01g31810D	GSBRNA2T00006656001	BnaC01G0377100ZS	1672	4413	12.3236	32.8777	1.41568	Up	9.22644e-287	6.19515e-285
BnaC01g31800D	GSBRNA2T00006658001	BnaC01G0376100ZS	145	389	1.24931	3.3878	1.43921	Up	1.64695e-27	1.33465e-26
BnaC01g31700D	GSBRNA2T00006675001	BnaC01G0374800ZS	110	44	1.2695	0.513285	-1.30643	Down	1.04806e-07	3.79191e-07
BnaA09g16100D	GSBRNA2T00006712001	BnaC04G0185200ZS	1236	3	12.5239	0.030726	-8.671	Down	0	0
BnaA09g16180D	GSBRNA2T00006721001	BnaA09G0185900ZS	1	123	0.00663094	0.824413	6.95801	Up	3.05456e-36	3.04059e-35
BnaA01g36190D	GSBRNA2T00006747001	BnaC01G0345800ZS	218	5	5.15226	0.119447	-5.43076	Down	1.07306e-57	1.52009e-56
BnaA01g36230D	GSBRNA2T00006751001	BnaA01G0282500ZS	566	1232	3.43287	7.55295	1.13762	Up	1.99029e-58	2.84582e-57
BnaA01g36260D	GSBRNA2T00006755001	BnaC01G0346500ZS	19	81	0.231523	0.997678	2.10742	Up	1.17734e-10	5.16612e-10
BnaA09g38880D	GSBRNA2T00006768001	BnaA09G0553500ZS	0	75	0.001	1.03088	10.0097	Up	1.75798e-23	1.27271e-22
BnaA09g15710D	GSBRNA2T00006808001	BnaC09G0215200ZS	1508	3040	10.1356	20.6531	1.02693	Up	4.79204e-120	1.27215e-118
BnaCnng22290D	GSBRNA2T00006835001	BnaC03G0393100ZS	0	24	0.001	0.327038	8.35331	Up	5.20972e-08	1.92809e-07
BnaC07g48990D	GSBRNA2T00006846001	BnaA06G0385900ZS	26	2	0.952938	0.0740945	-3.68494	Down	1.85827e-06	6.09173e-06
BnaC07g49070D	GSBRNA2T00006855001	BnaA06G0386700ZS	1304	456	7.62314	2.69455	-1.50034	Down	1.27055e-92	2.68243e-91
BnaC07g49080D	GSBRNA2T00006856001	BnaC07G0301300ZS	141	32	0.87556	0.200855	-2.12406	Down	1.75549e-17	1.04802e-16
BnaCnng22330D	GSBRNA2T00006861001		763	1818	16.9245	40.7615	1.26809	Up	5.00534e-101	1.138e-99
BnaCnng69420D	GSBRNA2T00006881001	Bnascaffold0026G0034600ZS	63	1	1.61507	0.0259128	-5.96178	Down	5.0145e-18	3.05102e-17
BnaAnng34690D	GSBRNA2T00006885001	BnaA04G0168000ZS	0	630	0.001	3.56715	11.8006	Up	7.50618e-192	3.26826e-190
BnaCnng69430D	GSBRNA2T00006886001	BnaC09G0617300ZS	34	101	0.290541	0.872399	1.58624	Up	3.01836e-09	1.21282e-08
BnaUnng03980D	GSBRNA2T00006927001	BnaC07G0005200ZS	0	12	0.001	0.276908	8.11326	Up	0.000227634	0.00060297
BnaA07g39140D	GSBRNA2T00006978001	BnaA07G0375700ZS	832	345	4.27752	1.79289	-1.25449	Down	6.67118e-46	7.93818e-45
BnaA07g39250D	GSBRNA2T00006993001	BnaA07G0374800ZS	67	13	0.34751	0.0681555	-2.35015	Down	5.12334e-10	2.16331e-09
BnaA04g27890D	GSBRNA2T00007057001	BnaA04G0132200ZS	0	40	0.001	0.219921	7.78084	Up	7.29316e-13	3.58584e-12
BnaA04g27950D	GSBRNA2T00007067001	BnaA04G0131500ZS	47	17	0.244046	0.0892251	-1.45163	Down	0.000180421	0.000483339
BnaUnng03990D	GSBRNA2T00007085001		335	111	2.17826	0.729546	-1.57811	Down	7.65014e-27	6.0931e-26
BnaCnng69610D	GSBRNA2T00007101001	BnaA07G0286900ZS	35	172	0.478016	2.37448	2.31248	Up	1.81855e-23	1.31566e-22
BnaUnng04000D	GSBRNA2T00007111001		29	0	0.48939	0.001	-8.93484	Down	2.18732e-09	8.87406e-09
BnaAnng34810D	GSBRNA2T00007123001	BnaC01G0285100ZS	176	1044	1.35247	8.10926	2.58397	Up	9.8332e-153	3.36601e-151
BnaAnng34820D	GSBRNA2T00007125001	BnaC03G0216500ZS	229	73	3.18319	1.02569	-1.63388	Down	1.01019e-19	6.51169e-19
BnaCnng69640D	GSBRNA2T00007127001	BnaA08G0249700ZS	2461	5351	12.9725	28.5109	1.13606	Up	7.15144e-247	4.068e-245
BnaA01g36040D	GSBRNA2T00007159001		0	72	0.001	1.61432	10.6567	Up	1.42929e-22	1.00866e-21
BnaAnng11410D	GSBRNA2T00007170001	BnaA02G0370600ZS	4	45	0.0195576	0.222399	3.50735	Up	3.55488e-10	1.51561e-09
BnaAnng11450D	GSBRNA2T00007174001	BnaA02G0370200ZS	18	0	0.173755	0.001	-7.44091	Down	4.22334e-06	1.34084e-05
BnaAnng11460D	GSBRNA2T00007175001	BnaC09G0041700ZS	2590	6985	32.4451	88.4465	1.4468	Up	0	0
BnaAnng11480D	GSBRNA2T00007177001	BnaC02G0496000ZS	450	902	4.6758	9.4736	1.0187	Up	2.05054e-36	2.04699e-35
BnaCnng22540D	GSBRNA2T00007205001	BnaC04G0119800ZS	127	302	0.643767	1.54738	1.26522	Up	4.26728e-18	2.60243e-17
BnaCnng22580D	GSBRNA2T00007212001	BnaA05G0096900ZS	79	187	0.5911	1.4143	1.25861	Up	1.12268e-11	5.2054e-11
BnaC02g43930D	GSBRNA2T00007235001	BnaC02G0550600ZS	183	72	1.36166	0.541519	-1.33028	Down	3.22952e-12	1.53655e-11
BnaC02g43900D	GSBRNA2T00007240001	BnaC02G0551000ZS	907	40	4.18396	0.186511	-4.48753	Down	5.77016e-213	2.82811e-211
BnaA05g35060D	GSBRNA2T00007249001	BnaA05G0113800ZS	3808	1706	2.22837	1.0091	-1.14292	Down	7.51764e-176	3.0039e-174
BnaC03g71760D	GSBRNA2T00007275001	BnaC03G0143900ZS	6	37	0.0521749	0.325219	2.63999	Up	7.92198e-07	2.67568e-06
BnaCnng69670D	GSBRNA2T00007302001	BnaA03G0579500ZS	0	108	0.001	1.42262	10.4743	Up	1.71336e-33	1.60077e-32
BnaCnng22810D	GSBRNA2T00007378001		0	14	0.001	0.247258	7.94987	Up	5.6299e-05	0.000159852
BnaCnng22890D	GSBRNA2T00007391001	BnaA01G0368700ZS	153	72	2.51854	1.19799	-1.07197	Down	8.02434e-08	2.92896e-07
BnaCnng23020D	GSBRNA2T00007408001	BnaA01G0367800ZS	26306	7458	198.411	56.8589	-1.80304	Down	0	0
BnaC07g49530D	GSBRNA2T00007413001	BnaC07G0353100ZS	64	28	0.734105	0.324639	-1.17715	Down	0.000193331	0.00051651
BnaAnng11550D	GSBRNA2T00007441001	BnaA01G0031600ZS	0	15	0.001	0.341975	8.41775	Up	2.79984e-05	8.21565e-05
BnaAnng11560D	GSBRNA2T00007442001	BnaA01G0031700ZS	695	1571	6.88599	15.7334	1.19209	Up	1.31975e-79	2.44117e-78
BnaAnng11570D	GSBRNA2T00007443001	BnaA01G0031800ZS	9	43	0.0938278	0.453129	2.27184	Up	1.00837e-06	3.37704e-06
BnaAnng11620D	GSBRNA2T00007449001	BnaA01G0032300.1ZS	76	158	0.439637	0.923852	1.07135	Up	4.12324e-08	1.53661e-07
BnaAnng11680D	GSBRNA2T00007457001	BnaA01G0032900ZS	3	43	0.0399834	0.579285	3.8568	Up	1.97484e-10	8.53379e-10
BnaAnng35030D	GSBRNA2T00007516001	BnaA07G0306200ZS	2	148	0.0263932	1.97419	6.22495	Up	3.64302e-42	4.04907e-41
BnaCnng69820D	GSBRNA2T00007543001	BnaC09G0191200ZS	103	211	0.93919	1.94475	1.05009	Up	4.37088e-10	1.8537e-09
BnaC01g38540D	GSBRNA2T00007555001	BnaA01G0366200ZS	510	251	4.2649	2.12167	-1.00731	Down	1.06843e-20	7.11282e-20
BnaC09g51360D	GSBRNA2T00007569001	BnaC02G0060100ZS	47	126	0.347784	0.942427	1.43819	Up	6.96008e-10	2.91569e-09
BnaA04g10630D	GSBRNA2T00007618001	BnaC04G0408600ZS	50	5	0.253041	0.0255774	-3.30643	Down	1.49868e-10	6.5316e-10
BnaA04g10620D	GSBRNA2T00007620001	BnaA04G0120700ZS	350	164	3.77035	1.78576	-1.07816	Down	3.14102e-16	1.78493e-15
BnaCnng23180D	GSBRNA2T00007639001	BnaC07G0108200ZS	0	104	0.001	2.43542	11.25	Up	2.80106e-32	2.54975e-31
BnaA07g37580D	GSBRNA2T00007685001	BnaC06G0185700ZS	10	47	0.0821609	0.390326	2.24816	Up	3.67038e-07	1.27359e-06
BnaA10g30540D	GSBRNA2T00007728001	BnaA10G0296500ZS	525	211	14.7484	5.99145	-1.29958	Down	3.70874e-31	3.2934e-30
BnaA10g30550D	GSBRNA2T00007729001	BnaC09G0617100ZS	297	69	5.95446	1.3983	-2.0903	Down	1.7024e-34	1.62681e-33
BnaCnng69900D	GSBRNA2T00007738001	BnaC05G0481300ZS	0	43	0.001	1.43093	10.4827	Up	8.97036e-14	4.596e-13
BnaCnng69930D	GSBRNA2T00007756001	BnaC03G0277900ZS	733	297	4.9586	2.03084	-1.28785	Down	2.86568e-42	3.19138e-41
BnaC04g55020D	GSBRNA2T00007760001	BnaC04G0260600ZS	0	20	0.001	0.146134	7.19115	Up	8.51704e-07	2.86755e-06
BnaC02g44520D	GSBRNA2T00007856001	BnaC02G0234700ZS	40	307	0.332723	2.58122	2.95566	Up	5.17158e-53	6.87696e-52
BnaCnng70020D	GSBRNA2T00007903001	BnaC03G0519800ZS	42	100	0.332835	0.801022	1.26703	Up	6.31162e-07	2.1486e-06
BnaAnng35190D	GSBRNA2T00007906001	BnaC09G0152800ZS	1424	429	17.1516	5.22295	-1.7154	Down	3.6887e-122	1.00025e-120
BnaAnng35200D	GSBRNA2T00007907001	BnaA09G0141600ZS	623	151	19.4849	4.77366	-2.02919	Down	5.87112e-68	9.50305e-67
BnaAnng35340D	GSBRNA2T00007959001	BnaA08G0263300ZS	147	60	2.81483	1.16132	-1.27729	Down	1.4712e-09	6.03483e-09
BnaAnng35350D	GSBRNA2T00007962001		45	507	1.27947	14.571	3.50948	Up	2.15444e-101	4.90742e-100
BnaAnng35360D	GSBRNA2T00007964001		67	1301	0.644765	12.6552	4.29481	Up	1.5438e-300	1.10328e-298
BnaA10g28430D	GSBRNA2T00007985001	BnaA06G0436200ZS	0	122	0.001	1.66244	10.6991	Up	9.69812e-38	9.95932e-37
BnaA09g56390D	GSBRNA2T00007999001	BnaA09G0623000ZS	711	1584	5.19965	11.7091	1.17115	Up	4.55432e-78	8.30481e-77
BnaA09g56410D	GSBRNA2T00008002001	BnaA09G0623200ZS	471	1508	2.60418	8.42783	1.69433	Up	1.18501e-128	3.4114e-127
BnaC06g27780D	GSBRNA2T00008047001	BnaC06G0332700ZS	14	49	0.129801	0.45921	1.82285	Up	5.79972e-06	1.81887e-05
BnaC06g27790D	GSBRNA2T00008048001	BnaC06G0332800ZS	55	194	1.00204	3.57265	1.83405	Up	7.03894e-20	4.56498e-19
BnaC06g27820D	GSBRNA2T00008051001	BnaA07G0289900ZS	66	25	1.76932	0.677436	-1.38504	Down	1.73888e-05	5.19961e-05
BnaC06g27830D	GSBRNA2T00008052001	BnaA07G0290000ZS	813	4896	1.72662	10.5102	2.60577	Up	0	0
BnaC06g27850D	GSBRNA2T00008057001	BnaC06G0333200ZS	63	17	0.28229	0.0769961	-1.87432	Down	1.84072e-07	6.5331e-07
BnaA04g29360D	GSBRNA2T00008113001	BnaA04G0257700ZS	5489	2290	33.2486	14.021	-1.2457	Down	3.03854e-289	2.06674e-287
BnaA04g29410D	GSBRNA2T00008119001		0	61	0.001	1.02395	9.99993	Up	3.1058e-19	1.96876e-18
BnaCnng23810D	GSBRNA2T00008122001	BnaC02G0360400ZS	0	13	0.001	0.59562	9.21825	Up	0.000113206	0.000310849
BnaA03g58100D	GSBRNA2T00008159001	BnaC07G0436500ZS	87	218	0.707367	1.79162	1.34074	Up	1.34123e-14	7.13613e-14
BnaA06g01650D	GSBRNA2T00008258001	BnaA06G0019400ZS	1659	750	15.1716	6.93282	-1.12986	Down	2.63168e-76	4.72716e-75
BnaA06g01670D	GSBRNA2T00008260001	BnaA06G0019600ZS	1133	503	5.14554	2.30905	-1.15602	Down	1.38412e-54	1.88324e-53
BnaCnng24010D	GSBRNA2T00008270001	BnaC04G0400800ZS	35	229	0.178768	1.18229	2.72542	Up	8.33014e-37	8.3946e-36
BnaAnng11840D	GSBRNA2T00008282001	BnaA01G0169400ZS	79	15	1.01679	0.195146	-2.38139	Down	9.66848e-12	4.50023e-11
BnaAnng11900D	GSBRNA2T00008289001		34	1	3.39377	0.100895	-5.07197	Down	1.29227e-09	5.31635e-09
BnaAnng11910D	GSBRNA2T00008290001	BnaA01G0170100ZS	31	524	0.395736	6.76146	4.09472	Up	4.08282e-118	1.06384e-116
BnaAnng11940D	GSBRNA2T00008294001	BnaA01G0170400ZS	118	9	5.85803	0.451624	-3.69722	Down	2.1829e-25	1.66987e-24
BnaC03g76950D	GSBRNA2T00008324001	BnaC03G0716700ZS	26	2	0.640295	0.0497853	-3.68494	Down	1.85827e-06	6.09118e-06
BnaC04g00170D	GSBRNA2T00008330001	BnaC04G0002800ZS	1559	495	9.87028	3.16777	-1.63962	Down	2.29512e-125	6.4133e-124
BnaC04g00160D	GSBRNA2T00008331001	BnaC04G0002700ZS	79	22	0.825434	0.23235	-1.82885	Down	8.79232e-09	3.43042e-08
BnaC04g00040D	GSBRNA2T00008346001	BnaC04G0001500ZS	541	1459	3.23936	8.83044	1.44678	Up	2.91752e-99	6.52597e-98
BnaCnng70250D	GSBRNA2T00008362001	BnaC04G0040000ZS	1060	447	12.751	5.43512	-1.23022	Down	2.6309e-56	3.67089e-55
BnaAnng35510D	GSBRNA2T00008375001	BnaC02G0400400.1ZS	38	77	1.22524	2.50954	1.03436	Up	0.000206164	0.000549094
BnaCnng70400D	GSBRNA2T00008408001	Bnascaffold0025G0028700ZS	137	512	0.830388	3.13686	1.91746	Up	6.90784e-53	9.15754e-52
BnaCnng70420D	GSBRNA2T00008412001	BnaC01G0037100ZS	0	244	0.001	3.57669	11.8044	Up	9.45612e-75	1.67153e-73
BnaCnng24040D	GSBRNA2T00008421001	BnaC09G0325700ZS	827	1686	3.4138	7.03484	1.04314	Up	4.01888e-69	6.60413e-68
BnaA09g14100D	GSBRNA2T00008459001	BnaA09G0166800ZS	67	334	0.505343	2.54637	2.33311	Up	1.39028e-44	1.61629e-43
BnaA09g14110D	GSBRNA2T00008460001	BnaC09G0186500ZS	88	1428	0.407745	6.68805	4.03584	Up	0	0
BnaCnng24080D	GSBRNA2T00008489001	BnaC02G0244100ZS	147	445	0.978899	2.99533	1.61349	Up	1.14935e-36	1.15491e-35
BnaCnng24090D	GSBRNA2T00008490001	BnaC02G0244000ZS	52	110	0.591399	1.26455	1.09642	Up	3.18234e-06	1.02229e-05
BnaAnng35570D	GSBRNA2T00008562001	BnaC06G0160800ZS	0	39	0.001	0.560424	9.13038	Up	1.46651e-12	7.09995e-12
BnaAnng35650D	GSBRNA2T00008591001	BnaA05G0261500ZS	38	6	0.627721	0.100184	-2.64747	Down	6.47558e-07	2.20217e-06
BnaCnng24410D	GSBRNA2T00008615001	BnaC04G0399400ZS	28	0	0.224545	0.001	-7.81086	Down	4.35128e-09	1.73114e-08
BnaCnng24430D	GSBRNA2T00008617001	BnaA04G0114900ZS	717	211	4.45527	1.32526	-1.74923	Down	4.29924e-64	6.6533e-63
BnaCnng24500D	GSBRNA2T00008635001	BnaC07G0159400ZS	1429	565	9.98361	3.98996	-1.32319	Down	4.14212e-84	8.0646e-83
BnaC08g48020D	GSBRNA2T00008651001	BnaC08G0144800ZS	2135	988	11.369	5.31799	-1.09616	Down	4.26124e-93	9.03548e-92
BnaC01g41460D	GSBRNA2T00008668001	BnaC01G0161700ZS	71	981	0.72332	10.102	3.80386	Up	6.78246e-208	3.2251e-206
BnaCnng24580D	GSBRNA2T00008699001	BnaC03G0561600ZS	205	493	0.912462	2.21806	1.28146	Up	4.2585e-29	3.5911e-28
BnaC08g47830D	GSBRNA2T00008702001	BnaA08G0078400ZS	26	107	0.176649	0.734829	2.05652	Up	2.86892e-13	1.43844e-12
BnaC08g47850D	GSBRNA2T00008705001		0	65	0.001	1.00238	9.96922	Up	1.89976e-20	1.25436e-19
BnaA06g40480D	GSBRNA2T00008718001	BnaA06G0446500ZS	0	20	0.001	0.490134	8.93703	Up	8.51704e-07	2.86847e-06
BnaA06g40510D	GSBRNA2T00008721001	BnaA06G0446400ZS	145	552	0.503145	1.9361	1.94411	Up	6.48714e-58	9.21279e-57
BnaA06g40630D	GSBRNA2T00008736001	BnaA06G0447400ZS	160	386	1.45188	3.54049	1.28602	Up	3.02058e-23	2.17348e-22
BnaAnng12180D	GSBRNA2T00008749001	BnaA08G0314800ZS	812	2215	10.4654	28.8562	1.46325	Up	3.12994e-152	1.06693e-150
BnaAnng12210D	GSBRNA2T00008754001	BnaA09G0704400ZS	671	310	6.07121	2.83517	-1.09855	Down	1.49633e-30	1.31176e-29
BnaCnng70640D	GSBRNA2T00008819001	BnaA04G0231300ZS	34	76	0.20974	0.473893	1.17596	Up	4.32238e-05	0.000124291
BnaC05g08470D	GSBRNA2T00008859001	BnaC05G0089100ZS	407	201	2.26366	1.13	-1.00234	Down	1.05731e-16	6.11784e-16
BnaC05g08770D	GSBRNA2T00008904001	BnaC05G0094000ZS	1440	3129	6.21205	13.644	1.13513	Up	5.153e-145	1.66888e-143
BnaC05g08860D	GSBRNA2T00008915001	BnaC05G0095200ZS	77	4	0.774356	0.0406607	-4.25129	Down	1.13228e-18	7.0364e-18
BnaC05g09040D	GSBRNA2T00008939001	BnaC08G0500800ZS	43	0	0.235391	0.001	-7.87891	Down	1.439e-13	7.30487e-13
BnaC05g09120D	GSBRNA2T00008951001	BnaC05G0097400ZS	69	29	0.682924	0.290125	-1.23505	Down	5.7717e-05	0.000163631
BnaC04g11680D	GSBRNA2T00008988001	BnaC04G0140900ZS	0	220	0.001	1.64033	10.6798	Up	1.80535e-67	2.90547e-66
BnaC04g11510D	GSBRNA2T00009017001	BnaC04G0139900ZS	279	681	1.0186	2.5131	1.30289	Up	1.49342e-40	1.6127e-39
BnaC04g11110D	GSBRNA2T00009085001	BnaC04G0135700ZS	266	598	2.54936	5.79315	1.18422	Up	4.64686e-31	4.11748e-30
BnaC04g10990D	GSBRNA2T00009104001	BnaC04G0134400ZS	33	119	0.201714	0.73525	1.86592	Up	5.1557e-13	2.55237e-12
BnaC09g13680D	GSBRNA2T00009169001	BnaC09G0173300ZS	26	86	0.1264	0.422608	1.74132	Up	5.099e-09	2.02039e-08
BnaC09g13660D	GSBRNA2T00009172001	BnaC06G0152400ZS	1	31	0.013921	0.436212	4.96969	Up	6.69688e-09	2.63318e-08
BnaC09g13630D	GSBRNA2T00009176001	BnaC09G0172800ZS	173	804	1.58363	7.43924	2.23192	Up	1.75643e-99	3.94447e-98
BnaC09g13550D	GSBRNA2T00009186001	BnaC09G0172000ZS	64	23	0.750622	0.272668	-1.46094	Down	1.06954e-05	3.26989e-05
BnaC09g13540D	GSBRNA2T00009187001	BnaA09G0156200ZS	803	1948	3.72252	9.12798	1.29402	Up	1.61903e-111	3.99704e-110
BnaC09g13510D	GSBRNA2T00009193001	BnaC09G0171600ZS	31	1	0.482365	0.0157282	-4.9387	Down	9.34876e-09	3.6421e-08
BnaA05g19850D	GSBRNA2T00009235001	BnaC02G0235700ZS	0	75	0.001	0.409739	8.67856	Up	1.75798e-23	1.27259e-22
BnaA05g19880D	GSBRNA2T00009238001	BnaC02G0282700ZS	239	1437	1.45145	8.82114	2.60347	Up	2.73582e-211	1.32935e-209
BnaA05g19900D	GSBRNA2T00009242001	BnaA05G0346400ZS	130	786	1.83147	11.1929	2.61151	Up	8.3258e-117	2.14351e-115
BnaA05g19910D	GSBRNA2T00009243001	BnaA05G0346600ZS	1108	2405	6.75073	14.8112	1.13358	Up	1.13926e-111	2.81638e-110
BnaA05g20060D	GSBRNA2T00009263001	BnaC01G0193400ZS	3	111	0.0088489	0.330945	5.22495	Up	6.78602e-30	5.83935e-29
BnaA05g20070D	GSBRNA2T00009264001	BnaC01G0193500ZS	83	278	0.670776	2.27096	1.7594	Up	2.29756e-26	1.80407e-25
BnaA05g20090D	GSBRNA2T00009266001	BnaA05G0349300ZS	1522	4131	11.0874	30.4183	1.45602	Up	4.35634e-280	2.83929e-278
BnaA05g20250D	GSBRNA2T00009285001	BnaA05G0351000ZS	681	1668	4.08808	10.1212	1.30789	Up	2.51542e-97	5.54868e-96
BnaA05g20310D	GSBRNA2T00009295001	BnaA05G0351600ZS	0	180	0.001	1.19297	10.2203	Up	2.4621e-55	3.37942e-54
BnaA05g20390D	GSBRNA2T00009304001	BnaA05G0352300ZS	324	904	4.55775	12.854	1.49582	Up	2.81274e-65	4.41624e-64
BnaA05g20420D	GSBRNA2T00009308001	BnaC05G0385400ZS	98	41	0.393458	0.166388	-1.24166	Down	1.41768e-06	4.69229e-06
BnaC09g28960D	GSBRNA2T00009320001		1	23	0.0171846	0.399513	4.53906	Up	1.36859e-06	4.53453e-06
BnaC09g29250D	GSBRNA2T00009379001	BnaC01G0359600ZS	60	151	0.713519	1.81508	1.34701	Up	1.29867e-10	5.68153e-10
BnaC09g29420D	GSBRNA2T00009406001	BnaC01G0046800.2ZS	121	546	1.20012	5.47391	2.18939	Up	1.51042e-66	2.40496e-65
BnaC09g29530D	GSBRNA2T00009426001	BnaC09G0353800ZS	147	42	3.36407	0.971542	-1.79186	Down	8.4257e-15	4.5197e-14
BnaC09g29540D	GSBRNA2T00009427001	BnaC09G0353900ZS	77	10	1.19417	0.156762	-2.92936	Down	4.80208e-14	2.49488e-13
BnaC09g29570D	GSBRNA2T00009431001		0	18	0.001	0.563412	9.13805	Up	3.4437e-06	1.10249e-05
BnaA09g03610D	GSBRNA2T00009440001	BnaA09G0055300ZS	93	38	1.79178	0.740033	-1.27574	Down	1.61006e-06	5.30748e-06
BnaA09g03750D	GSBRNA2T00009457001	BnaA09G0056600ZS	0	65	0.001	0.243759	7.92931	Up	1.89976e-20	1.25424e-19
BnaA09g03960D	GSBRNA2T00009483001		986	10596	9.23295	100.293	3.44128	Up	0	0
BnaA09g04020D	GSBRNA2T00009490001	BnaC09G0046900ZS	48	167	0.381996	1.34338	1.81424	Up	4.3995e-17	2.58709e-16
BnaA09g04140D	GSBRNA2T00009507001	BnaA09G0060300ZS	51	123	0.237598	0.579218	1.28559	Up	2.24528e-08	8.52699e-08
BnaA09g04470D	GSBRNA2T00009542001	BnaA09G0063200ZS	29	74	0.416056	1.07312	1.36697	Up	5.71072e-06	1.79211e-05
BnaA09g04510D	GSBRNA2T00009548001	BnaA09G0063600ZS	224	100	1.45048	0.654527	-1.148	Down	6.46788e-12	3.03575e-11
BnaA09g04590D	GSBRNA2T00009560001	BnaA09G0479900ZS	118	0	4.1467	0.001	-12.0177	Down	5.69204e-36	5.62325e-35
BnaA09g04610D	GSBRNA2T00009565001	BnaA09G0065000ZS	3205	1027	17.9855	5.82546	-1.62639	Down	1.05245e-252	6.12448e-251
BnaC09g31260D	GSBRNA2T00009628001	BnaC09G0373500ZS	6607	14771	35.6686	80.604	1.1762	Up	0	0
BnaC09g31570D	GSBRNA2T00009674001	BnaC09G0376000ZS	7	45	0.0579184	0.376353	2.69999	Up	3.23854e-08	1.21568e-07
BnaC09g31830D	GSBRNA2T00009709001	BnaC09G0378900ZS	15	0	0.137982	0.001	-7.10834	Down	3.32482e-05	9.67634e-05
BnaA09g03220D	GSBRNA2T00009731001	BnaC09G0037200ZS	86	176	0.305883	0.632753	1.04866	Up	1.26513e-08	4.88923e-08
BnaA09g03140D	GSBRNA2T00009741001	BnaA09G0050300ZS	1067	456	15.5699	6.7259	-1.21096	Down	2.56452e-55	3.51868e-54
BnaA09g02760D	GSBRNA2T00009793001	BnaA09G0046200ZS	24	111	0.121854	0.569662	2.22495	Up	5.38282e-15	2.90829e-14
BnaA09g02640D	GSBRNA2T00009809001	BnaA09G0045000ZS	57	140	0.395283	0.981356	1.31189	Up	1.33755e-09	5.49769e-09
BnaA09g02540D	GSBRNA2T00009824001	BnaA09G0044000ZS	25	4	0.337025	0.0545063	-2.62836	Down	6.70202e-05	0.000188722
BnaA09g02480D	GSBRNA2T00009832001	Bnascaffold0027G0000800ZS	0	15	0.001	0.12668	6.98504	Up	2.79984e-05	8.21762e-05
BnaA09g02410D	GSBRNA2T00009840001	BnaC09G0028300ZS	13	1095	0.189404	16.1259	6.41177	Up	4e-307	2.9447e-305
BnaA09g02380D	GSBRNA2T00009845001	BnaA09G0042600ZS	29	83	0.361355	1.04539	1.53255	Up	1.62682e-07	5.79637e-07
BnaA09g02340D	GSBRNA2T00009850001	BnaA09G0042300ZS	4	26	0.0435901	0.286396	2.71594	Up	2.9946e-05	8.7563e-05
BnaA09g02120D	GSBRNA2T00009877001	BnaA09G0040000ZS	27	149	0.284008	1.58423	2.47978	Up	3.67262e-22	2.56098e-21
BnaA09g01980D	GSBRNA2T00009894001	BnaA09G0039000ZS	567	1277	2.8664	6.52543	1.18683	Up	1.31798e-64	2.05003e-63
BnaA09g01860D	GSBRNA2T00009909001	BnaA09G0037700ZS	25	70	0.222552	0.629874	1.50092	Up	2.22506e-06	7.24394e-06
BnaA01g29300D	GSBRNA2T00009919001	BnaA01G0352900ZS	12	52	0.228384	1.00035	2.13097	Up	2.22712e-07	7.84715e-07
BnaA01g29030D	GSBRNA2T00009952001	BnaA01G0350900ZS	18	0	0.169909	0.001	-7.40862	Down	4.22334e-06	1.34061e-05
BnaA01g29010D	GSBRNA2T00009954001	BnaC01G0434600ZS	825	388	6.21251	2.95332	-1.07284	Down	7.6164e-36	7.49808e-35
BnaA01g29000D	GSBRNA2T00009955001	BnaA01G0350700ZS	34	85	0.292943	0.740265	1.33742	Up	1.70704e-06	5.61555e-06
BnaA01g28930D	GSBRNA2T00009965001	BnaA01G0348200ZS	36	1	0.354067	0.00994141	-5.15443	Down	3.44194e-10	1.46874e-09
BnaA01g28900D	GSBRNA2T00009968001	BnaA01G0348500ZS	8293	2109	84.8543	21.8124	-1.95984	Down	0	0
BnaA01g28820D	GSBRNA2T00009976001	BnaA01G0349300ZS	331	704	4.11897	8.85518	1.10424	Up	1.33416e-32	1.22464e-31
BnaA01g28810D	GSBRNA2T00009977001	BnaA01G0349400ZS	2468	472	22.7472	4.39734	-2.37099	Down	0	0
BnaA01g28800D	GSBRNA2T00009978001	BnaA01G0349500ZS	87	33	0.302558	0.116003	-1.38305	Down	8.0024e-07	2.7016e-06
BnaA01g28710D	GSBRNA2T00009990001	BnaA01G0348100ZS	8	47	0.0489005	0.290393	2.57008	Up	3.77144e-08	1.40937e-07
BnaA01g28670D	GSBRNA2T00009996001	BnaC03G0412800ZS	65	148	0.821942	1.89171	1.20258	Up	5.73248e-09	2.26504e-08
BnaA01g28310D	GSBRNA2T00010038001	BnaA01G0344400ZS	32	119	0.130827	0.491768	1.91031	Up	2.18828e-13	1.1023e-12
BnaA01g28130D	GSBRNA2T00010061001	BnaC01G0423600ZS	121	43	0.863358	0.310127	-1.4771	Down	9.08816e-10	3.7804e-09
BnaA01g28080D	GSBRNA2T00010069001	BnaA01G0342200ZS	48	333	0.257651	1.80675	2.80991	Up	1.62261e-54	2.20486e-53
BnaC09g30380D	GSBRNA2T00010079001	BnaC09G0362600ZS	0	12	0.001	0.0972728	6.60397	Up	0.000227634	0.000603101
BnaC09g30320D	GSBRNA2T00010088001	BnaC09G0362400ZS	0	51	0.001	0.760518	9.57084	Up	3.3563e-16	1.90284e-15
BnaC09g30310D	GSBRNA2T00010090001	BnaC09G0361700ZS	137	29	2.19733	0.470152	-2.22456	Down	5.94912e-18	3.60949e-17
BnaC09g30230D	GSBRNA2T00010111001	BnaC09G0360900ZS	30	118	0.217698	0.865525	1.99125	Up	5.90896e-14	3.05566e-13
BnaC09g30180D	GSBRNA2T00010127001	BnaC02G0176800ZS	313	123	2.42912	0.964884	-1.33201	Down	6.8113e-20	4.41891e-19
BnaC03g74050D	GSBRNA2T00010214001	BnaC03G0461700ZS	376	1001	2.2022	5.92608	1.42813	Up	2.19504e-67	3.52876e-66
BnaCnng24640D	GSBRNA2T00010248001	BnaA01G0399800ZS	331	162	3.30745	1.63623	-1.01534	Down	3.98104e-14	2.07552e-13
BnaCnng24690D	GSBRNA2T00010253001	BnaA01G0399300ZS	109	259	0.97962	2.35286	1.26412	Up	1.03105e-15	5.73113e-15
BnaA05g35920D	GSBRNA2T00010322001		0	28	0.001	0.275758	8.10726	Up	3.18668e-09	1.27786e-08
BnaA05g35960D	GSBRNA2T00010328001	BnaC03G0362200ZS	0	15	0.001	0.353884	8.46713	Up	2.79984e-05	8.21729e-05
BnaCnng24750D	GSBRNA2T00010332001	BnaC06G0286900ZS	437	1100	3.07597	7.82634	1.34729	Up	9.29162e-68	1.50097e-66
BnaCnng24760D	GSBRNA2T00010333001	BnaA09G0541200ZS	134	19	1.10289	0.158068	-2.80267	Down	1.78829e-22	1.2585e-21
BnaCnng24770D	GSBRNA2T00010335001	BnaC06G0287600ZS	2	144	0.012688	0.923401	6.18542	Up	5.6454e-41	6.1406e-40
BnaCnng70780D	GSBRNA2T00010382001	BnaC07G0219800ZS	461	1227	3.58959	9.65726	1.42779	Up	3.6793e-82	6.9963e-81
BnaCnng70820D	GSBRNA2T00010392001	BnaC02G0242300ZS	335	162	4.99719	2.44265	-1.03267	Down	1.22037e-14	6.5044e-14
BnaC02g46320D	GSBRNA2T00010393001	BnaA02G0200700ZS	96	782	0.770528	6.34437	3.04156	Up	2.6979e-136	8.22187e-135
BnaA09g56660D	GSBRNA2T00010422001	BnaA09G0625900ZS	92	37	0.659951	0.268281	-1.29861	Down	1.31674e-06	4.36905e-06
BnaAnng12320D	GSBRNA2T00010451001	BnaA01G0226000ZS	222	109	1.99137	0.988305	-1.01074	Down	7.01948e-10	2.93991e-09
BnaCnng24930D	GSBRNA2T00010465001	BnaC01G0273400ZS	59	21	0.4856	0.174707	-1.47483	Down	2.09662e-05	6.22668e-05
BnaCnng24990D	GSBRNA2T00010474001	BnaC09G0046300ZS	0	12	0.001	0.0365711	5.19263	Up	0.000227634	0.000602687
BnaA06g38240D	GSBRNA2T00010486001	BnaA06G0084500ZS	170	0	1.54412	0.001	-10.5926	Down	1.66981e-51	2.17508e-50
BnaA06g38280D	GSBRNA2T00010491001	BnaA06G0084900ZS	134	38	1.4255	0.408612	-1.80267	Down	1.0209e-13	5.21784e-13
BnaC04g54380D	GSBRNA2T00010501001	BnaC04G0183400.4ZS	1307	2917	3.7873	8.54389	1.17372	Up	1.17248e-142	3.72486e-141
BnaC03g75410D	GSBRNA2T00010526001		67	4	2.30273	0.138961	-4.05059	Down	6.51358e-16	3.64771e-15
BnaUnng04130D	GSBRNA2T00010540001	BnaA03G0106900ZS	298	662	4.93134	11.0731	1.16701	Up	1.8578e-33	1.73528e-32
BnaA09g52790D	GSBRNA2T00010581001	BnaA01G0200700ZS	4304	11554	24.6091	66.7759	1.44014	Up	0	0
BnaAnng35850D	GSBRNA2T00010582001	BnaA08G0096500ZS	7	29	0.122081	0.511225	2.06612	Up	0.000168314	0.000452642
BnaUnng04140D	GSBRNA2T00010584001	BnaA04G0058800ZS	118	3	1.77716	0.0456698	-5.28218	Down	2.1201e-31	1.89137e-30
BnaA04g16450D	GSBRNA2T00010596001	BnaC04G0117300ZS	35	4	0.112273	0.0129697	-3.11379	Down	2.20666e-07	7.77693e-07
BnaAnng12400D	GSBRNA2T00010613001		443	2195	6.85903	34.3525	2.32434	Up	6.14972e-282	4.04772e-280
BnaCnng25050D	GSBRNA2T00010624001	BnaC05G0415700ZS	93	41	0.894973	0.398819	-1.16611	Down	7.84504e-06	2.42679e-05
BnaCnng25090D	GSBRNA2T00010632001	BnaA04G0119700ZS	382	156	4.371	1.80429	-1.27653	Down	1.62842e-22	1.14742e-21
BnaCnng25100D	GSBRNA2T00010633001	BnaA05G0374900ZS	6	102	0.113046	1.94253	4.10296	Up	3.9221e-24	2.89695e-23
BnaAnng12490D	GSBRNA2T00010660001	BnaC04G0351100ZS	3	23	0.0194529	0.150749	2.9541	Up	4.39074e-05	0.000126183
BnaCnng25130D	GSBRNA2T00010685001	BnaC09G0150100ZS	191	81	1.57895	0.676839	-1.22208	Down	2.67146e-11	1.2128e-10
BnaCnng25160D	GSBRNA2T00010691001	BnaC09G0150600ZS	175	0	2.85563	0.001	-11.4796	Down	5.35978e-53	7.12206e-52
BnaC03g77990D	GSBRNA2T00010695001	BnaC03G0682700ZS	18	232	0.216526	2.82091	3.70355	Up	2.45668e-49	3.08761e-48
BnaA02g07040D	GSBRNA2T00010708001	BnaA02G0105200ZS	52	853	0.44803	7.42878	4.05146	Up	8.60044e-190	3.69642e-188
BnaA02g07020D	GSBRNA2T00010712001	BnaA02G0104900ZS	9761	4259	94.5153	41.685	-1.18102	Down	0	0
BnaA02g06960D	GSBRNA2T00010720001	BnaA02G0104000ZS	228	500	0.278298	0.616892	1.14839	Up	4.67624e-25	3.5432e-24
BnaAnng35860D	GSBRNA2T00010752001	BnaA05G0374300ZS	3	282	0.0258479	2.45594	6.57008	Up	1.38841e-80	2.59766e-79
BnaAnng35870D	GSBRNA2T00010757001	BnaA01G0325200ZS	5419	2515	40.9382	19.2049	-1.09197	Down	7.72092e-232	4.12024e-230
BnaCnng25170D	GSBRNA2T00010774001	BnaC01G0265400ZS	0	13	0.001	0.0856204	6.41988	Up	0.000113206	0.00031079
BnaCnng25180D	GSBRNA2T00010776001		4	2115	0.0162613	8.69102	9.06194	Up	0	0
BnaA04g28050D	GSBRNA2T00010783001	BnaA04G0166300ZS	210	537	1.60585	4.15074	1.37003	Up	8.5875e-35	8.2611e-34
BnaA04g28060D	GSBRNA2T00010784001	BnaC04G0463000ZS	0	446	0.001	4.00181	11.9664	Up	4.95734e-136	1.50824e-134
BnaA04g28100D	GSBRNA2T00010788001	BnaA04G0166600ZS	37	0	0.105392	0.001	-6.71963	Down	8.91832e-12	4.1574e-11
BnaA04g28130D	GSBRNA2T00010793001	BnaA04G0166900ZS	30	2	0.20309	0.0136856	-3.89139	Down	1.52933e-07	5.45934e-07
BnaC04g02690D	GSBRNA2T00010816001	BnaC04G0033200ZS	2	22	0.0289592	0.321991	3.47493	Up	1.73371e-05	5.18544e-05
BnaA09g57000D	GSBRNA2T00010899001	BnaC07G0464600ZS	0	24	0.001	0.204509	7.67602	Up	5.20972e-08	1.92857e-07
BnaA09g57130D	GSBRNA2T00010914001	BnaC08G0491500ZS	13	424	0.057836	1.90671	5.04298	Up	9.25304e-109	2.23104e-107
BnaAnng35900D	GSBRNA2T00010938001	BnaC01G0344900ZS	19	57	0.203508	0.617116	1.60046	Up	7.8823e-06	2.4376e-05
BnaAnng36020D	GSBRNA2T00010983001	BnaA03G0557600ZS	0	16	0.001	0.568336	9.1506	Up	1.3924e-05	4.20819e-05
BnaA04g27530D	GSBRNA2T00010987001	BnaA04G0017900ZS	2	48	0.0202433	0.491086	4.60046	Up	9.14628e-13	4.47327e-12
BnaC02g48330D	GSBRNA2T00011025001	BnaC02G0313800ZS	0	1193	0.001	4.58821	12.1637	Up	0	0
BnaC02g48340D	GSBRNA2T00011026001	BnaC02G0313700ZS	0	203	0.001	1.45744	10.5092	Up	2.59314e-62	3.9155e-61
BnaC03g71490D	GSBRNA2T00011097001	BnaC03G0060000ZS	30	115	0.19032	0.737439	1.9541	Up	2.45474e-13	1.23407e-12
BnaC04g52840D	GSBRNA2T00011134001	BnaC04G0038100ZS	295	119	2.55579	1.04211	-1.29426	Down	4.37234e-18	2.66605e-17
BnaC04g52890D	GSBRNA2T00011139001	BnaC04G0038700ZS	1114	2488	4.98209	11.2471	1.17473	Up	3.95248e-122	1.07098e-120
BnaCnng71320D	GSBRNA2T00011183001	BnaC04G0148600ZS	161	53	2.88839	0.961104	-1.5875	Down	8.88704e-14	4.5565e-13
BnaC01g44010D	GSBRNA2T00011186001	BnaC02G0510800ZS	0	32	0.001	0.474205	8.88937	Up	1.94924e-10	8.4311e-10
BnaCnng71340D	GSBRNA2T00011193001	BnaC07G0066500ZS	27	84	0.301589	0.94841	1.65293	Up	2.6058e-08	9.84668e-08
BnaA05g34540D	GSBRNA2T00011209001	BnaA05G0060100ZS	291	879	1.36111	4.1558	1.61034	Up	1.44064e-70	2.41445e-69
BnaA05g34550D	GSBRNA2T00011210001	BnaA05G0060200.1ZS	779	2309	2.70711	8.11066	1.58307	Up	6.59954e-178	2.65732e-176
BnaC04g52290D	GSBRNA2T00011228001	BnaC04G0023300ZS	1092	448	8.02349	3.32723	-1.26991	Down	8.11272e-61	1.19953e-59
BnaC03g67250D	GSBRNA2T00011267001	BnaC03G0762700ZS	102	47	1.5587	0.725982	-1.10234	Down	7.60776e-06	2.35697e-05
BnaA08g30150D	GSBRNA2T00011315001		17	0	0.135866	0.001	-7.08605	Down	8.40156e-06	2.59173e-05
BnaAnng12680D	GSBRNA2T00011324001	BnaA01G0413100ZS	24	4	0.169186	0.0285022	-2.56947	Down	0.000116255	0.000318648
BnaAnng12700D	GSBRNA2T00011326001	BnaC04G0615800ZS	37	4	0.264808	0.028937	-3.19396	Down	6.7894e-08	2.49171e-07
BnaAnng12720D	GSBRNA2T00011328001	BnaC04G0615800ZS	6	83	0.0732076	1.02364	3.80557	Up	7.0971e-19	4.44124e-18
BnaAnng12770D	GSBRNA2T00011333001	BnaC01G0502700ZS	39	9	0.292275	0.0681765	-2.09998	Down	1.09644e-05	3.34782e-05
BnaAnng36180D	GSBRNA2T00011385001	BnaC01G0374600ZS	70	143	1.11133	2.2948	1.04608	Up	3.11122e-07	1.08419e-06
BnaC03g73080D	GSBRNA2T00011419001	BnaC03G0320000ZS	4082	8569	26.8211	56.9113	1.08535	Up	0	0
BnaC03g73110D	GSBRNA2T00011426001	BnaC03G0320100ZS	1351	3096	6.72474	15.5771	1.21187	Up	4.52038e-159	1.6184e-157
BnaCnng25620D	GSBRNA2T00011464001	BnaC09G0195300ZS	6194	1760	32.1799	9.24254	-1.7998	Down	0	0
BnaCnng25630D	GSBRNA2T00011466001	BnaA09G0619100ZS	66	25	2.61293	1.00043	-1.38504	Down	1.73888e-05	5.19983e-05
BnaA06g01730D	GSBRNA2T00011488001	BnaA06G0015600ZS	415	48	4.15566	0.485845	-3.09651	Down	2.17394e-73	3.78262e-72
BnaAnng12900D	GSBRNA2T00011506001	BnaA07G0262900ZS	101	210	0.464767	0.976783	1.07153	Up	2.4699e-10	1.06143e-09
BnaCnng71450D	GSBRNA2T00011571001	BnaC03G0093900ZS	0	76	0.001	3.81371	11.897	Up	8.74268e-24	6.38804e-23
BnaAnng36240D	GSBRNA2T00011578001	BnaC03G0499700ZS	0	21	0.001	0.265555	8.05287	Up	4.23564e-07	1.46295e-06
BnaC08g49430D	GSBRNA2T00011590001	BnaC08G0467800ZS	11	40	0.0674579	0.24795	1.87799	Up	3.04196e-05	8.88557e-05
BnaA03g56820D	GSBRNA2T00011639001	BnaC03G0259900ZS	27	159	0.908011	5.40492	2.57349	Up	1.66413e-24	1.24167e-23
BnaA03g56870D	GSBRNA2T00011645001	BnaA03G0221200ZS	0	69	0.001	0.790342	9.62633	Up	1.16205e-21	7.98474e-21
BnaA03g56880D	GSBRNA2T00011646001	BnaA03G0221300ZS	1674	3717	12.5755	28.2245	1.16634	Up	1.94994e-179	7.93869e-178
BnaA03g56900D	GSBRNA2T00011648001	BnaA03G0221500ZS	13	56	0.130316	0.567425	2.12241	Up	8.09268e-08	2.95361e-07
BnaA03g56920D	GSBRNA2T00011650001	BnaA03G0221700ZS	1428	550	20.2702	7.89146	-1.361	Down	1.09862e-87	2.22157e-86
BnaA03g56960D	GSBRNA2T00011655001	BnaA03G0222000ZS	382	876	3.21167	7.44451	1.21285	Up	2.22442e-46	2.66505e-45
BnaA09g53050D	GSBRNA2T00011659001	BnaA09G0140700ZS	203	88	0.993586	0.435368	-1.19041	Down	1.70231e-11	7.80847e-11
BnaA07g38200D	GSBRNA2T00011681001	BnaA07G0216400ZS	141	941	0.609945	4.11459	2.754	Up	8.77086e-148	2.89427e-146
BnaA07g38230D	GSBRNA2T00011685001	BnaA07G0216100ZS	300	700	2.19737	5.18257	1.23789	Up	1.4302e-38	1.49043e-37
BnaCnng25790D	GSBRNA2T00011713001	BnaC05G0300300ZS	1878	860	4.22867	1.95736	-1.11129	Down	6.47644e-84	1.25694e-82
BnaA10g28560D	GSBRNA2T00011726001	BnaC05G0159100.1ZS	14	122	0.259091	2.28217	3.13888	Up	3.39608e-23	2.44033e-22
BnaA02g36870D	GSBRNA2T00011729001	BnaA02G0327100ZS	72	7	1.33247	0.130944	-3.34707	Down	8.25982e-15	4.43234e-14
BnaCnng71600D	GSBRNA2T00011759001	BnaC06G0049300.2ZS	6	1028	0.040356	6.989	7.43616	Up	3.72382e-299	2.64063e-297
BnaCnng71650D	GSBRNA2T00011769001	BnaC03G0037900ZS	58	126	0.394921	0.867197	1.13479	Up	2.9185e-07	1.01921e-06
BnaCnng25820D	GSBRNA2T00011810001	BnaC06G0016500ZS	0	17	0.001	0.159004	7.31292	Up	6.9246e-06	2.15378e-05
BnaCnng25840D	GSBRNA2T00011813001	BnaC06G0014200ZS	93	42	1.27573	0.582357	-1.13135	Down	1.28602e-05	3.89858e-05
BnaA03g55990D	GSBRNA2T00011943001	BnaA03G0073900ZS	1201	3527	18.0588	53.6065	1.5697	Up	2.22902e-267	1.3981e-265
BnaUnng04240D	GSBRNA2T00011963001	BnaC05G0372300ZS	40	3	0.337207	0.0255636	-3.72147	Down	1.98502e-09	8.07207e-09
BnaCnng71790D	GSBRNA2T00011965001	BnaC09G0230500ZS	96	15	1.0685	0.168756	-2.66258	Down	1.10655e-15	6.1401e-15
BnaCnng26020D	GSBRNA2T00011989001	BnaC03G0614000ZS	33	158	0.481542	2.33046	2.27488	Up	2.80862e-21	1.90523e-20
BnaA09g54940D	GSBRNA2T00012006001	BnaA09G0499800ZS	10	37	0.0474597	0.177497	1.90302	Up	5.28694e-05	0.000150569
BnaC09g54200D	GSBRNA2T00012041001	BnaC09G0483000ZS	757	40	11.2031	0.598366	-4.22673	Down	3.23052e-171	1.25064e-169
BnaC09g54210D	GSBRNA2T00012042001	BnaC09G0482900ZS	440	199	0.742389	0.339388	-1.12924	Down	1.914e-21	1.3061e-20
BnaA07g36340D	GSBRNA2T00012071001	BnaA07G0039300ZS	1458	565	3.7593	1.47252	-1.35217	Down	1.27577e-88	2.60131e-87
BnaA07g36360D	GSBRNA2T00012073001	BnaA07G0039600ZS	4	2040	0.0352736	18.1838	9.00985	Up	0	0
BnaAnng36470D	GSBRNA2T00012100001	BnaA04G0266300ZS	107	227	0.786184	1.6859	1.10058	Up	1.75032e-11	8.02519e-11
BnaAnng36570D	GSBRNA2T00012135001	BnaA09G0612500ZS	192	1021	1.40962	7.57689	2.4263	Up	4.80268e-139	1.49215e-137
BnaUnng04250D	GSBRNA2T00012138001	BnaC01G0008900ZS	0	37	0.001	0.816074	9.67256	Up	5.92954e-12	2.78753e-11
BnaC04g36870D	GSBRNA2T00012175001	BnaC04G0453800ZS	9	92	0.0743354	0.768079	3.36913	Up	6.33852e-19	3.97468e-18
BnaC04g36580D	GSBRNA2T00012226001	BnaC08G0117800ZS	763	227	9.02782	2.71487	-1.73349	Down	2.93772e-67	4.71443e-66
BnaC04g36560D	GSBRNA2T00012229001	BnaC04G0456300ZS	32	2	0.262226	0.0165661	-3.9845	Down	4.3388e-08	1.61465e-07
BnaC04g36370D	GSBRNA2T00012256001	BnaC04G0457900ZS	1717	3642	5.09979	10.9342	1.10034	Up	2.63686e-160	9.51021e-159
BnaC01g23890D	GSBRNA2T00012336001	BnaC01G0307400ZS	33	8	0.220222	0.0539636	-2.0289	Down	7.9258e-05	0.000221354
BnaC01g23880D	GSBRNA2T00012342001		30	188	0.588877	3.73015	2.66319	Up	9.16e-30	7.85175e-29
BnaC02g24380D	GSBRNA2T00012398001	BnaC02G0288200ZS	1394	2785	8.43301	17.0298	1.01394	Up	6.80668e-108	1.62887e-106
BnaC02g24300D	GSBRNA2T00012411001	BnaC02G0301100ZS	0	26	0.001	0.406909	8.66856	Up	1.28848e-08	4.97551e-08
BnaC02g24030D	GSBRNA2T00012473001	BnaC02G0297400ZS	9	47	0.0825464	0.435731	2.40016	Up	1.22914e-07	4.42046e-07
BnaC02g24010D	GSBRNA2T00012477001	BnaA02G0220700ZS	34	8	0.283568	0.0674425	-2.07197	Down	4.85838e-05	0.000138898
BnaC02g23980D	GSBRNA2T00012481001	BnaA02G0220700ZS	149	1388	1.00289	9.44328	3.23512	Up	3.31606e-255	1.94826e-253
BnaC02g23910D	GSBRNA2T00012490001	BnaC02G0295900ZS	21	90	1.21629	5.26895	2.11503	Up	9.70428e-12	4.51604e-11
BnaC02g23900D	GSBRNA2T00012491001		61	343	0.895696	5.09084	2.50682	Up	1.21776e-49	1.53735e-48
BnaC02g23890D	GSBRNA2T00012492001		0	56	0.001	0.79152	9.62848	Up	1.02098e-17	6.14524e-17
BnaC04g06070D	GSBRNA2T00012508001	BnaC04G0567600ZS	41	98	0.61551	1.48711	1.27265	Up	7.4987e-07	2.53844e-06
BnaC04g05500D	GSBRNA2T00012594001	BnaC04G0069000ZS	724	320	6.13652	2.74157	-1.16242	Down	8.4861e-36	8.34531e-35
BnaC04g05490D	GSBRNA2T00012596001	BnaC04G0460700ZS	956	2257	5.13742	12.2598	1.25482	Up	5.961e-123	1.62422e-121
BnaC04g05290D	GSBRNA2T00012626001		39	2	0.640855	0.0332193	-4.26991	Down	5.0412e-10	2.12973e-09
BnaC07g12240D	GSBRNA2T00012704001	BnaC07G0163100ZS	16	0	0.381996	0.001	-8.57741	Down	1.67134e-05	5.00746e-05
BnaC08g14480D	GSBRNA2T00012783001	BnaC08G0204100ZS	65	22	1.01816	0.348331	-1.54744	Down	3.66016e-06	1.16811e-05
BnaC08g14360D	GSBRNA2T00012799001	BnaC08G0202600ZS	13	432	0.0728216	2.44605	5.06994	Up	4.3923e-111	1.08182e-109
BnaC08g14290D	GSBRNA2T00012809001	BnaC08G0202100ZS	0	101	0.001	1.5425	10.5911	Up	2.27734e-31	2.02992e-30
BnaC08g14130D	GSBRNA2T00012828001	BnaC08G0200600ZS	589	91	2.21147	0.345359	-2.67883	Down	3.03628e-89	6.22217e-88
BnaC08g14110D	GSBRNA2T00012830001	BnaC08G0200400ZS	3434	1477	32.6448	14.1925	-1.20172	Down	7.88162e-172	3.07396e-170
BnaC08g14090D	GSBRNA2T00012832001	BnaC08G0200200ZS	1993	4177	15.1785	32.1551	1.08302	Up	6.06342e-179	2.45901e-177
BnaC08g14080D	GSBRNA2T00012834001	BnaC08G0200000ZS	1127	535	3.9649	1.90251	-1.05938	Down	2.15678e-47	2.62781e-46
BnaC08g13980D	GSBRNA2T00012845001	BnaC08G0199100ZS	1022	2108	3.88856	8.10725	1.05998	Up	3.4143e-88	6.93097e-87
BnaC08g13870D	GSBRNA2T00012858001	BnaC08G0196700ZS	0	72	0.001	0.383196	8.58194	Up	1.42929e-22	1.00875e-21
BnaC08g13830D	GSBRNA2T00012862001	BnaC08G0196300ZS	426	157	2.65939	0.990688	-1.42459	Down	3.40696e-29	2.88363e-28
BnaA02g08440D	GSBRNA2T00012904001	BnaA02G0121000ZS	1256	2702	16.1657	35.1523	1.12069	Up	5.6859e-123	1.54984e-121
BnaA02g08490D	GSBRNA2T00012910001	BnaA02G0121400ZS	0	15	0.001	0.0818536	6.35497	Up	2.79984e-05	8.21532e-05
BnaA02g08610D	GSBRNA2T00012931001	BnaC02G0152500ZS	58	140	0.393209	0.959375	1.2868	Up	2.33284e-09	9.44823e-09
BnaA02g08680D	GSBRNA2T00012943001	BnaC07G0059800ZS	39	1871	0.197054	9.5556	5.59969	Up	0	0
BnaA02g08790D	GSBRNA2T00012960001	BnaA02G0123700ZS	5	29	0.0664503	0.389574	2.55155	Up	1.95056e-05	5.80819e-05
BnaA02g08820D	GSBRNA2T00012964001	BnaA02G0125500ZS	1929	6782	8.62286	30.6437	1.82935	Up	0	0
BnaA02g08850D	GSBRNA2T00012967001	BnaA02G0125700ZS	431	2995	4.80282	33.735	2.81229	Up	0	0
BnaA02g08970D	GSBRNA2T00012985001	BnaC02G0158000ZS	77	227	0.640491	1.90859	1.57526	Up	7.40422e-19	4.62988e-18
BnaA02g08980D	GSBRNA2T00012986001	BnaA02G0127000ZS	3	20	0.0226091	0.152355	2.75246	Up	0.000251158	0.000661458
BnaA02g08990D	GSBRNA2T00012988001	BnaA02G0127100ZS	314	625	1.84367	3.70936	1.00859	Up	2.41942e-25	1.84772e-24
BnaA02g09000D	GSBRNA2T00012989001	BnaA02G0127200ZS	312	1644	1.2147	6.46965	2.41309	Up	2.62808e-221	1.34378e-219
BnaA02g09180D	GSBRNA2T00013010001	BnaA02G0128900ZS	1313	587	6.50453	2.93937	-1.14594	Down	4.01294e-62	6.03943e-61
BnaA02g09260D	GSBRNA2T00013021001	BnaC02G0161900ZS	224	1238	2.1123	11.8003	2.48194	Up	1.11241e-172	4.36179e-171
BnaA02g09270D	GSBRNA2T00013022001	BnaA02G0129800ZS	171	3667	0.850268	18.4304	4.43803	Up	0	0
BnaA02g09360D	GSBRNA2T00013031001	BnaC02G0163100ZS	141	3	1.11361	0.0239498	-5.53909	Down	4.79876e-38	4.95647e-37
BnaA02g09380D	GSBRNA2T00013033001	BnaC02G0163300ZS	228	625	1.76508	4.89073	1.47032	Up	1.4797e-44	1.71889e-43
BnaC07g06920D	GSBRNA2T00013120001	BnaC07G0047800ZS	6	27	0.0141342	0.0642909	2.18542	Up	0.000172865	0.000464063
BnaC05g26280D	GSBRNA2T00013172001	BnaC05G0304300ZS	1	18	0.0122972	0.22374	4.18542	Up	3.63346e-05	0.000105245
BnaC05g26120D	GSBRNA2T00013208001	BnaC05G0306500ZS	0	13	0.001	0.109303	6.77218	Up	0.000113206	0.000310988
BnaC05g26060D	GSBRNA2T00013221001	BnaC05G0307000ZS	0	184	0.001	1.62484	10.6661	Up	1.50602e-56	2.10657e-55
BnaC05g26040D	GSBRNA2T00013223001	BnaC05G0307100ZS	19	193	0.253589	2.60374	3.36003	Up	4.08116e-38	4.22063e-37
BnaC05g26030D	GSBRNA2T00013226001	BnaC05G0307300ZS	1	34	0.0154831	0.532111	5.10296	Up	8.96396e-10	3.73043e-09
BnaC06g01340D	GSBRNA2T00013275001	BnaC08G0237700ZS	1	30	0.00897015	0.272011	4.92239	Up	1.30699e-08	5.04274e-08
BnaC06g01350D	GSBRNA2T00013276001	BnaC08G0237700ZS	22	179	0.349866	2.87738	3.03988	Up	2.13856e-32	1.95323e-31
BnaC06g01360D	GSBRNA2T00013277001	BnaC06G0445800.1ZS	0	269	0.001	3.34806	11.7091	Up	2.46318e-82	4.69233e-81
BnaC06g01370D	GSBRNA2T00013278001	BnaC03G0510000ZS	0	397	0.001	3.05368	11.5763	Up	3.63338e-121	9.74434e-120
BnaC06g01430D	GSBRNA2T00013286001	BnaC03G0510600ZS	72	185	0.479121	1.24437	1.37695	Up	4.53214e-13	2.2502e-12
BnaC06g01460D	GSBRNA2T00013290001	BnaC06G0023500ZS	4	69	0.0251718	0.438902	4.12402	Up	9.03378e-17	5.2466e-16
BnaC06g01520D	GSBRNA2T00013302001		0	139	0.001	1.99741	10.9639	Up	6.75182e-43	7.61402e-42
BnaC08g47230D	GSBRNA2T00013330001	BnaC03G0499700ZS	0	206	0.001	1.12867	10.1404	Up	3.1895e-63	4.86912e-62
BnaC02g46030D	GSBRNA2T00013346001	BnaC07G0112600ZS	1	34	0.0130862	0.449734	5.10296	Up	8.96396e-10	3.73022e-09
BnaC02g46050D	GSBRNA2T00013350001	BnaA08G0007300ZS	59	261	0.69897	3.12544	2.16076	Up	3.75874e-32	3.4143e-31
BnaC02g45440D	GSBRNA2T00013401001	BnaC02G0210600ZS	246	783	1.5296	4.92117	1.68585	Up	3.25556e-67	5.22336e-66
BnaAnng36590D	GSBRNA2T00013465001	BnaA05G0353300ZS	27	113	0.304856	1.28966	2.08079	Up	3.98996e-14	2.08003e-13
BnaCnng71990D	GSBRNA2T00013486001	BnaA08G0229900ZS	171	7	2.06494	0.0854424	-4.595	Down	6.82912e-42	7.55593e-41
BnaAnng36650D	GSBRNA2T00013504001	BnaA09G0208500ZS	2	35	0.0174563	0.308785	4.14478	Up	4.49268e-09	1.78575e-08
BnaC07g48580D	GSBRNA2T00013536001	BnaA07G0145700ZS	61	271	1.03126	4.63098	2.16691	Up	1.94654e-33	1.81678e-32
BnaCnng26360D	GSBRNA2T00013575001	BnaC05G0364200ZS	1265	6096	27.0987	131.998	2.28422	Up	0	0
BnaA04g28140D	GSBRNA2T00013604001	BnaA04G0164000ZS	2	18	0.0456583	0.415362	3.18542	Up	0.000201672	0.000537716
BnaA04g28150D	GSBRNA2T00013605001	BnaA04G0164000ZS	4	332	0.0247567	2.07699	6.39054	Up	6.48884e-94	1.38671e-92
BnaA04g28240D	GSBRNA2T00013617001	BnaA04G0164600ZS	3	52	0.0795151	1.39314	4.13097	Up	6.2121e-13	3.06583e-12
BnaC09g53820D	GSBRNA2T00013644001	BnaC09G0092000ZS	0	60	0.001	0.987927	9.94826	Up	6.24516e-19	3.91681e-18
BnaCnng72040D	GSBRNA2T00013656001	BnaC03G0495400ZS	35	153	0.245439	1.0845	2.1436	Up	2.74908e-19	1.7455e-18
BnaC08g49590D	GSBRNA2T00013661001	BnaC08G0485000ZS	1144	478	15.5564	6.57015	-1.24351	Down	1.25023e-61	1.86815e-60
BnaCnng26590D	GSBRNA2T00013733001	BnaC06G0094200ZS	661	291	8.94952	3.9825	-1.16814	Down	4.51574e-33	4.18647e-32
BnaC07g50830D	GSBRNA2T00013759001	BnaC07G0490500ZS	43	108	0.273903	0.695372	1.34412	Up	5.94074e-08	2.18946e-07
BnaC01g42000D	GSBRNA2T00013787001	BnaC01G0500500ZS	279	133	1.7302	0.833698	-1.05334	Down	8.4853e-13	4.15637e-12
BnaC06g43100D	GSBRNA2T00013800001	BnaA07G0225300ZS	473	169	3.22065	1.16314	-1.46932	Down	1.09497e-33	1.02852e-32
BnaAnng36830D	GSBRNA2T00013846001	BnaC01G0500000ZS	793	2822	6.14921	22.1191	1.84682	Up	2.74752e-269	1.73669e-267
BnaAnng36860D	GSBRNA2T00013863001	BnaA09G0313800ZS	62	186	0.388339	1.1776	1.60046	Up	4.76544e-16	2.68307e-15
BnaCnng72210D	GSBRNA2T00013871001	BnaC03G0617100ZS	74	264	1.33268	4.80576	1.85044	Up	8.25354e-27	6.56727e-26
BnaCnng72230D	GSBRNA2T00013882001	BnaC09G0301700ZS	28	3	1.12273	0.121591	-3.2069	Down	2.94094e-06	9.47279e-06
BnaCnng72240D	GSBRNA2T00013883001		103	4	3.67462	0.144245	-4.671	Down	5.86574e-26	4.5527e-25
BnaCnng26800D	GSBRNA2T00013897001	BnaC08G0258500ZS	26	5	0.406587	0.0790342	-2.36302	Down	0.000127466	0.00034805
BnaCnng26850D	GSBRNA2T00013902001	BnaC08G0257800ZS	1	20	0.00543299	0.109833	4.33742	Up	9.84262e-06	3.01761e-05
BnaAnng36930D	GSBRNA2T00014042001	BnaA01G0379500ZS	153	37	3.81799	0.933276	-2.03244	Down	6.80396e-18	4.12167e-17
BnaC01g43270D	GSBRNA2T00014055001	BnaC06G0072500ZS	1	50	0.0053281	0.269282	5.65935	Up	1.79769e-14	9.50817e-14
BnaC04g56590D	GSBRNA2T00014085001	BnaC04G0561900ZS	8	94	0.0712842	0.846634	3.57008	Up	3.1947e-20	2.09259e-19
BnaC04g56600D	GSBRNA2T00014086001	BnaA04G0246700ZS	3	27	0.0247785	0.225414	3.18542	Up	4.05862e-06	1.29073e-05
BnaCnng27120D	GSBRNA2T00014162001	BnaC08G0186600ZS	1151	431	10.1404	3.83817	-1.40163	Down	3.3558e-74	5.88936e-73
BnaA02g35630D	GSBRNA2T00014229001	BnaA07G0273200ZS	70	200	0.270397	0.780906	1.53007	Up	3.7402e-16	2.11525e-15
BnaA02g35690D	GSBRNA2T00014239001	BnaA02G0175200ZS	18	51	0.457697	1.31081	1.518	Up	4.84422e-05	0.000138542
BnaC07g49170D	GSBRNA2T00014243001	BnaC07G0326700ZS	35	101	0.176938	0.516107	1.54442	Up	6.02168e-09	2.37623e-08
BnaCnng27210D	GSBRNA2T00014279001	BnaC02G0226700ZS	78	283	1.00946	3.70207	1.87475	Up	4.12468e-29	3.48065e-28
BnaAnng37130D	GSBRNA2T00014370001	BnaA03G0184900ZS	398	1718	3.68279	16.0687	2.12539	Up	5.53908e-198	2.48405e-196
BnaAnng37140D	GSBRNA2T00014375001	BnaA09G0578300ZS	0	111	0.001	1.21423	10.2458	Up	2.10738e-34	2.01092e-33
BnaAnng37180D	GSBRNA2T00014397001	BnaC02G0296900ZS	94	1893	1.06648	21.7091	4.34737	Up	0	0
BnaCnng27470D	GSBRNA2T00014423001	BnaC03G0418800ZS	24	4	0.305131	0.0514043	-2.56947	Down	0.000116255	0.00031866
BnaCnng27500D	GSBRNA2T00014428001	BnaA03G0347200ZS	16	104	0.153974	1.01164	2.71594	Up	1.95412e-17	1.16461e-16
BnaC09g52930D	GSBRNA2T00014433001		0	205	0.001	3.56741	11.8007	Up	6.41342e-63	9.75827e-62
BnaA05g36150D	GSBRNA2T00014455001	BnaA07G0286500ZS	1	124	0.0155602	1.9503	6.96969	Up	1.53113e-36	1.53413e-35
BnaAnng37220D	GSBRNA2T00014537001	BnaA10G0039400ZS	1	209	0.0136576	2.88527	7.72286	Up	4.18048e-62	6.29028e-61
BnaA09g52480D	GSBRNA2T00014588001	BnaA09G0091500ZS	44	15	0.515409	0.177605	-1.53705	Down	0.000158638	0.000427782
BnaAnng13490D	GSBRNA2T00014646001	BnaC09G0343700ZS	593	105	3.35787	0.600984	-2.48215	Down	1.45595e-82	2.7779e-81
BnaAnng13540D	GSBRNA2T00014657001	BnaC01G0107700ZS	0	179	0.001	2.50391	11.29	Up	4.9508e-55	6.77885e-54
BnaAnng13550D	GSBRNA2T00014658001	BnaC01G0107600ZS	0	116	0.001	2.79938	11.4509	Up	6.4106e-36	6.3195e-35
BnaA06g40890D	GSBRNA2T00014665001	BnaC07G0550100ZS	20	50	0.129776	0.327943	1.33742	Up	0.000254888	0.000670655
BnaA08g29970D	GSBRNA2T00014680001	BnaA05G0374900ZS	0	20	0.001	0.164227	7.35955	Up	8.51704e-07	2.86781e-06
BnaC01g15490D	GSBRNA2T00014768001	BnaC01G0171100ZS	1	15	0.0306627	0.464907	3.92239	Up	0.000253188	0.000666445
BnaA10g27940D	GSBRNA2T00014788001	BnaA10G0048800ZS	5394	48757	29.7535	271.85	3.19168	Up	0	0
BnaA10g28010D	GSBRNA2T00014795001	BnaA10G0049600ZS	556	221	10.2291	4.10978	-1.31554	Down	1.7005e-33	1.58957e-32
BnaC02g48610D	GSBRNA2T00014805001	BnaC02G0508500ZS	355	1840	2.36401	12.3852	2.38931	Up	1.39566e-244	7.87183e-243
BnaC02g48650D	GSBRNA2T00014810001	BnaA02G0380300ZS	699	10	6.955	0.100574	-6.11172	Down	1.27673e-190	5.51642e-189
BnaC02g48660D	GSBRNA2T00014811001	BnaC02G0509000ZS	268	771	1.98781	5.78043	1.53999	Up	2.6004e-58	3.71168e-57
BnaC07g17120D	GSBRNA2T00014812001	BnaC07G0228500ZS	17	63	0.118681	0.444567	1.90531	Up	1.10318e-07	3.98542e-07
BnaA03g60750D	GSBRNA2T00014851001	BnaA03G0574000ZS	86	40	0.455886	0.21433	-1.08884	Down	4.7833e-05	0.000136895
BnaAnng37450D	GSBRNA2T00014879001	BnaA06G0129500ZS	4	28	0.0528607	0.374021	2.82285	Up	9.53662e-06	2.92918e-05
BnaCnng72930D	GSBRNA2T00014909001	BnaC01G0305300ZS	19	62	0.573224	1.89072	1.72176	Up	9.00562e-07	3.02704e-06
BnaCnng27780D	GSBRNA2T00014923001	BnaC01G0246400.1ZS	2117	590	6.95495	1.95925	-1.82774	Down	3.71196e-197	1.65354e-195
BnaCnng27830D	GSBRNA2T00014929001	BnaC01G0246800ZS	0	67	0.001	0.501923	8.97132	Up	4.69854e-21	3.16675e-20
BnaCnng27840D	GSBRNA2T00014930001	BnaC01G0246800ZS	2	19	0.0129239	0.124103	3.26342	Up	0.000109811	0.000302239
BnaC03g75450D	GSBRNA2T00014985001	BnaA06G0176300.1ZS	1550	222	4.41241	0.638796	-2.78814	Down	4.16086e-242	2.32005e-240
BnaC03g75460D	GSBRNA2T00014987001	BnaC03G0618100ZS	546	0	8.1837	0.001	-12.9985	Down	8.12848e-164	2.99199e-162
BnaCnng28090D	GSBRNA2T00015011001	BnaC05G0084100ZS	1154	470	5.17825	2.13177	-1.28041	Down	5.64244e-65	8.81758e-64
BnaCnng28150D	GSBRNA2T00015017001	BnaC04G0228800ZS	317	669	1.19403	2.54712	1.09302	Up	1.4011e-30	1.22887e-29
BnaCnng28160D	GSBRNA2T00015018001	BnaC04G0228700ZS	243	1	2.7143	0.0112906	-7.90932	Down	3.19794e-71	5.4103e-70
BnaCnng28170D	GSBRNA2T00015022001	BnaC04G0228600ZS	752	0	7.14878	0.001	-12.8035	Down	2.38238e-225	1.24153e-223
BnaUnng04370D	GSBRNA2T00015060001		0	111	0.001	1.92105	10.9077	Up	2.10738e-34	2.0104e-33
BnaA08g25340D	GSBRNA2T00015144001	BnaA08G0284600ZS	271	2065	1.33337	10.2699	2.94527	Up	0	0
BnaA08g25210D	GSBRNA2T00015160001	BnaC08G0209500ZS	2	19	0.0180092	0.172935	3.26342	Up	0.000109811	0.00030216
BnaA08g24860D	GSBRNA2T00015202001	BnaC06G0023000ZS	6	770	0.0168856	2.19039	7.01925	Up	1.23516e-221	6.32442e-220
BnaA08g24850D	GSBRNA2T00015203001	BnaC08G0215300ZS	0	14	0.001	0.14216	7.15137	Up	5.6299e-05	0.000159938
BnaA08g24740D	GSBRNA2T00015217001	BnaA08G0279000ZS	69	167	0.427617	1.04613	1.29068	Up	6.07892e-11	2.7076e-10
BnaA01g33330D	GSBRNA2T00015280001	BnaC01G0514300ZS	0	55	0.001	0.367601	8.522	Up	2.05298e-17	1.22134e-16
BnaA01g33410D	GSBRNA2T00015288001	BnaC01G0513600ZS	394	1303	3.25138	10.8688	1.74107	Up	1.04694e-115	2.66822e-114
BnaA01g33430D	GSBRNA2T00015292001	BnaC01G0513300ZS	625	1697	3.56922	9.79581	1.45655	Up	2.70034e-116	6.92782e-115
BnaA01g33570D	GSBRNA2T00015310001	Bnascaffold0026G0050200ZS	163	48	2.6691	0.79448	-1.74827	Down	9.2395e-16	5.14715e-15
BnaA01g33650D	GSBRNA2T00015320001	BnaC01G0511400ZS	1309	3720	27.8505	80.002	1.52233	Up	1.39549e-269	8.82846e-268
BnaA01g33710D	GSBRNA2T00015327001	BnaC09G0214600ZS	177	457	0.726806	1.89682	1.38394	Up	2.73094e-30	2.37533e-29
BnaA01g33750D	GSBRNA2T00015331001	BnaC03G0690300ZS	75	425	0.258052	1.47809	2.518	Up	2.0161e-61	3.00521e-60
BnaA01g33780D	GSBRNA2T00015334001	BnaA09G0479900ZS	449	1124	1.50299	3.80311	1.33935	Up	1.37548e-68	2.2437e-67
BnaA01g33850D	GSBRNA2T00015343001	BnaC01G0509200ZS	614	1245	3.44559	7.06203	1.03533	Up	6.69174e-51	8.63531e-50
BnaA01g33890D	GSBRNA2T00015347001	BnaA01G0406100ZS	171	954	1.38315	7.79986	2.49549	Up	2.49282e-134	7.48796e-133
BnaA01g33900D	GSBRNA2T00015349001	BnaC01G0508700ZS	84	383	0.32461	1.49605	2.20438	Up	1.42944e-47	1.7486e-46
BnaA01g33930D	GSBRNA2T00015352001	BnaA01G0406600ZS	30	0	0.146835	0.001	-7.19806	Down	1.09954e-09	4.54819e-09
BnaA01g34050D	GSBRNA2T00015365001	BnaA01G0408100ZS	57	627	0.121965	1.35611	3.47493	Up	6.10706e-124	1.68405e-122
BnaA01g34060D	GSBRNA2T00015366001	BnaC01G0507300ZS	473	3619	2.63542	20.3818	2.95118	Up	0	0
BnaA01g34070D	GSBRNA2T00015367001	BnaC01G0507200ZS	418	1099	2.92033	7.761	1.41011	Up	1.94269e-72	3.33983e-71
BnaA01g34370D	GSBRNA2T00015418001	BnaC01G0506300ZS	12	80	0.106825	0.719856	2.75246	Up	6.76418e-14	3.48857e-13
BnaA01g34430D	GSBRNA2T00015424001	BnaA05G0485000ZS	0	391	0.001	2.73472	11.4172	Up	2.40172e-119	6.33458e-118
BnaC03g29580D	GSBRNA2T00015599001	BnaC04G0158800ZS	428	1625	8.01563	30.7618	1.94025	Up	1.53578e-166	5.75116e-165
BnaC03g29590D	GSBRNA2T00015600001	BnaC04G0162500ZS	2	33	0.045994	0.767097	4.05989	Up	1.63286e-08	6.25498e-08
BnaC03g29620D	GSBRNA2T00015606001	BnaC03G0310600ZS	16	45	0.769869	2.18864	1.50735	Up	0.000149216	0.000403637
BnaC03g29730D	GSBRNA2T00015619001	BnaC03G0311500ZS	12	0	0.184882	0.001	-7.53046	Down	0.000261746	0.000687787
BnaC03g30100D	GSBRNA2T00015668001	BnaC03G0315700ZS	2	30	0.0195678	0.296687	3.92239	Up	1.11851e-07	4.03726e-07
BnaC03g30180D	GSBRNA2T00015681001	BnaC03G0316600ZS	32	69	0.0501921	0.109395	1.12402	Up	0.00017239	0.000462892
BnaA09g30840D	GSBRNA2T00015696001	BnaA09G0463800ZS	11	141	0.0468287	0.606742	3.69562	Up	1.74448e-30	1.52565e-29
BnaA09g30830D	GSBRNA2T00015697001	BnaA09G0463700ZS	82	30	1.07307	0.396824	-1.43517	Down	8.41682e-07	2.83641e-06
BnaA09g30820D	GSBRNA2T00015698001	BnaA09G0463600ZS	71	32	0.612859	0.279201	-1.13425	Down	0.000136696	0.000371552
BnaA09g30650D	GSBRNA2T00015724001	BnaA09G0461800ZS	84	177	0.622063	1.32493	1.09078	Up	3.79278e-09	1.51379e-08
BnaA09g30610D	GSBRNA2T00015732001	BnaA09G0461100ZS	0	172	0.001	1.07959	10.0763	Up	6.58044e-53	8.73457e-52
BnaA09g30290D	GSBRNA2T00015775001	BnaA09G0457500ZS	2	27	0.0334502	0.456454	3.77038	Up	7.53994e-07	2.5517e-06
BnaA09g30080D	GSBRNA2T00015807001	BnaA09G0455200ZS	50	107	0.431591	0.933578	1.11311	Up	3.30826e-06	1.06172e-05
BnaC03g27520D	GSBRNA2T00015843001	BnaC03G0287700ZS	1031	487	2.76311	1.31927	-1.06655	Down	5.77226e-44	6.64113e-43
BnaC03g27420D	GSBRNA2T00015859001	BnaC03G0287000ZS	73	764	0.0723276	0.765138	3.4031	Up	6.38316e-148	2.10825e-146
BnaC03g27390D	GSBRNA2T00015862001	BnaC03G0286700ZS	150	305	1.52814	3.14077	1.03934	Up	9.78592e-14	5.00511e-13
BnaC03g27260D	GSBRNA2T00015882001	BnaC06G0284400ZS	8	33	0.18131	0.755979	2.05989	Up	5.96016e-05	0.000168758
BnaC03g27250D	GSBRNA2T00015883001	BnaC03G0284800ZS	436	1335	3.23903	10.0248	1.62994	Up	4.58228e-108	1.09871e-106
BnaC03g26990D	GSBRNA2T00015930001	BnaC03G0282400ZS	201	58	1.38979	0.405363	-1.77757	Down	1.6617e-19	1.06374e-18
BnaC03g26940D	GSBRNA2T00015936001	BnaA03G0238900ZS	64	142	0.363278	0.814726	1.16524	Up	2.64882e-08	1.00051e-07
BnaC09g47300D	GSBRNA2T00016021001	BnaC09G0564600ZS	171	54	0.765119	0.244226	-1.64747	Down	2.92534e-15	1.59571e-14
BnaC09g47050D	GSBRNA2T00016053001	BnaA10G0248500ZS	0	19	0.001	0.117776	6.87991	Up	1.7126e-06	5.63084e-06
BnaC09g47040D	GSBRNA2T00016054001	BnaA10G0248400ZS	563	213	5.84348	2.23464	-1.38679	Down	1.3146e-36	1.31988e-35
BnaC09g46740D	GSBRNA2T00016088001	BnaC09G0559100ZS	94	412	0.523431	2.31896	2.14741	Up	1.89565e-49	2.38576e-48
BnaA09g43990D	GSBRNA2T00016132001	BnaA09G0607500ZS	4584	1649	62.6065	22.7646	-1.45952	Down	6e-308	4.43933e-306
BnaA09g44040D	GSBRNA2T00016137001	BnaC08G0461800ZS	1028	469	6.62465	3.05498	-1.11668	Down	4.26276e-47	5.17309e-46
BnaA09g44300D	GSBRNA2T00016167001	BnaC08G0464200ZS	3060	1416	16.1481	7.55314	-1.09621	Down	1.30516e-132	3.8713e-131
BnaA09g44380D	GSBRNA2T00016179001	BnaA09G0611100ZS	71	26	0.433709	0.160538	-1.43381	Down	4.74184e-06	1.49916e-05
BnaA09g44630D	GSBRNA2T00016207001	BnaA09G0614300ZS	17	0	0.216722	0.001	-7.7597	Down	8.40156e-06	2.59227e-05
BnaA09g44670D	GSBRNA2T00016215001	BnaA09G0614800ZS	283	20	3.95727	0.282686	-3.80723	Down	2.67604e-60	3.93532e-59
BnaA09g44940D	GSBRNA2T00016249001	BnaA09G0617000ZS	59	14	0.157223	0.0377101	-2.05979	Down	7.98096e-08	2.91385e-07
BnaA09g45000D	GSBRNA2T00016256001	BnaA09G0617600ZS	395	160	2.03525	0.833309	-1.28828	Down	1.54228e-23	1.11887e-22
BnaA09g45060D	GSBRNA2T00016263001	BnaA09G0618900ZS	84	187	0.975437	2.19496	1.17007	Up	1.45864e-10	6.36049e-10
BnaA09g45080D	GSBRNA2T00016266001	BnaA09G0619200ZS	1614	3451	22.9452	49.5904	1.11187	Up	1.48287e-154	5.12869e-153
BnaA06g20570D	GSBRNA2T00016322001	BnaA06G0260000ZS	30	8	0.463729	0.124996	-1.89139	Down	0.000333622	0.000865979
BnaA06g20600D	GSBRNA2T00016330001	BnaA06G0260500ZS	0	448	0.001	4.21934	12.0428	Up	1.22606e-136	3.74888e-135
BnaA06g20610D	GSBRNA2T00016331001	BnaA06G0260600ZS	226	484	1.85684	4.01953	1.11418	Up	3.15206e-23	2.2672e-22
BnaA06g20640D	GSBRNA2T00016335001	BnaA06G0261000ZS	23	4	0.0750883	0.0131999	-2.50807	Down	0.000200688	0.000535346
BnaA06g20750D	GSBRNA2T00016352001	BnaA06G0262600ZS	247	589	1.41142	3.40203	1.26925	Up	5.84624e-34	5.52331e-33
BnaA06g20790D	GSBRNA2T00016361001	BnaA06G0263000ZS	264	123	10.0693	4.74205	-1.08638	Down	9.69652e-13	4.73512e-12
BnaA02g34770D	GSBRNA2T00016391001	BnaC02G0555800ZS	0	261	0.001	2.39396	11.2252	Up	6.58334e-80	1.22298e-78
BnaA02g34800D	GSBRNA2T00016397001	BnaC02G0556300ZS	2	46	0.0215696	0.501458	4.53906	Up	3.4166e-12	1.62398e-11
BnaA02g34830D	GSBRNA2T00016400001	BnaC07G0117600ZS	40	140	0.32922	1.16471	1.82285	Up	1.22592e-14	6.53353e-14
BnaA03g54940D	GSBRNA2T00016413001	BnaA03G0004900ZS	636	1642	5.79927	15.134	1.38385	Up	2.38834e-104	5.57175e-103
BnaA03g54960D	GSBRNA2T00016416001	BnaC03G0008200ZS	276	640	2.56909	6.02165	1.2289	Up	5.04268e-35	4.87596e-34
BnaA03g54970D	GSBRNA2T00016417001	BnaA03G0005300ZS	306	842	0.431944	1.20139	1.47578	Up	9.54306e-60	1.39055e-58
BnaAnng13680D	GSBRNA2T00016472001	BnaA02G0025400ZS	12518	25079	36.4084	73.7296	1.01797	Up	0	0
BnaAnng13690D	GSBRNA2T00016473001	BnaA02G0025500ZS	303	1526	0.912675	4.64614	2.34786	Up	5.37182e-199	2.42835e-197
BnaCnng28500D	GSBRNA2T00016517001	BnaC05G0463400ZS	0	46	0.001	2.17049	11.0838	Up	1.10333e-14	5.88786e-14
BnaA01g36270D	GSBRNA2T00016518001	BnaA01G0283300ZS	0	12	0.001	0.0649596	6.02147	Up	0.000227634	0.000602578
BnaA01g36280D	GSBRNA2T00016519001	BnaA01G0283200ZS	2206	8399	13.8358	53.2466	1.94428	Up	0	0
BnaAnng37580D	GSBRNA2T00016532001	BnaC05G0111600ZS	42	3	0.42511	0.0306929	-3.79186	Down	5.73004e-10	2.41365e-09
BnaAnng37610D	GSBRNA2T00016539001	BnaA03G0472500ZS	1618	315	10.0605	1.97978	-2.34529	Down	7.79562e-208	3.70206e-206
BnaCnng73120D	GSBRNA2T00016551001	BnaC01G0222500ZS	43	11	0.397889	0.102885	-1.95134	Down	1.04114e-05	3.18585e-05
BnaC02g44970D	GSBRNA2T00016592001	BnaA09G0581000ZS	20	147	0.128531	0.954906	2.89324	Up	1.25434e-25	9.65384e-25
BnaC07g18280D	GSBRNA2T00016622001	BnaC07G0237300ZS	24	2	0.0778654	0.00655885	-3.56947	Down	6.39284e-06	1.99694e-05
BnaC05g51810D	GSBRNA2T00016639001	BnaC05G0369100ZS	73	189	0.300414	0.786182	1.38791	Up	1.82353e-13	9.21351e-13
BnaAnng13750D	GSBRNA2T00016682001	BnaA01G0170800ZS	253	82	3.22095	1.05522	-1.60995	Down	3.28808e-21	2.22635e-20
BnaAnng13780D	GSBRNA2T00016690001	BnaA01G0171100ZS	83	12	3.93318	0.574794	-2.77458	Down	2.69718e-14	1.41666e-13
BnaAnng13790D	GSBRNA2T00016691001	BnaC08G0121500ZS	703	129	8.06368	1.49566	-2.43066	Down	3.08662e-95	6.684e-94
BnaCnng73170D	GSBRNA2T00016706001	BnaC04G0265600ZS	11	89	0.0679911	0.556051	3.0318	Up	9.28702e-17	5.39026e-16
BnaAnng37680D	GSBRNA2T00016711001	BnaA08G0049900ZS	114	459	1.22524	4.98649	2.02496	Up	5.017e-51	6.49015e-50
BnaCnng73240D	GSBRNA2T00016749001	BnaC01G0430700ZS	955	221	7.68487	1.79759	-2.09596	Down	1.44556e-107	3.44917e-106
BnaC04g52000D	GSBRNA2T00016788001	BnaC04G0005800ZS	2835	1198	11.7285	5.00968	-1.22722	Down	6.21258e-147	2.03269e-145
BnaA05g34260D	GSBRNA2T00016792001	BnaA05G0032800.1ZS	1624	747	4.82356	2.24268	-1.10488	Down	3.73686e-72	6.39136e-71
BnaCnng28710D	GSBRNA2T00016803001	BnaC02G0006700ZS	3043	1189	36.3717	14.3651	-1.34025	Down	1.99157e-180	8.18084e-179
BnaCnng28720D	GSBRNA2T00016805001	BnaC03G0011500ZS	33	4	0.237084	0.0290478	-3.0289	Down	7.0995e-07	2.40831e-06
BnaCnng28730D	GSBRNA2T00016807001	BnaC09G0181600ZS	43	5	1.02401	0.120357	-3.08884	Down	9.37262e-09	3.65081e-08
BnaCnng28740D	GSBRNA2T00016810001	BnaC02G0006500ZS	220	707	3.20033	10.3958	1.6997	Up	1.50037e-61	2.24011e-60
BnaCnng28760D	GSBRNA2T00016812001	BnaC02G0006300ZS	50	0	0.971302	0.001	-9.92378	Down	1.16716e-15	6.46961e-15
BnaCnng28800D	GSBRNA2T00016816001	BnaC02G0005900ZS	41	2	0.66556	0.032817	-4.34206	Down	1.39644e-10	6.09724e-10
BnaCnng28810D	GSBRNA2T00016817001	BnaC02G0005800ZS	406	0	10.2403	0.001	-13.322	Down	5.35244e-122	1.44818e-120
BnaCnng28820D	GSBRNA2T00016818001	BnaC02G0005700ZS	22	0	0.229357	0.001	-7.84145	Down	2.69676e-07	9.44426e-07
BnaCnng28840D	GSBRNA2T00016820001	BnaC02G0005600ZS	947	463	5.98753	2.95899	-1.01686	Down	1.32616e-37	1.35789e-36
BnaCnng28850D	GSBRNA2T00016821001	BnaC02G0005500ZS	240	27	1.68679	0.191813	-3.13651	Down	1.28307e-43	1.46792e-42
BnaC04g54540D	GSBRNA2T00016854001	BnaC04G0180800ZS	0	93	0.001	2.51288	11.2951	Up	6.08664e-29	5.11508e-28
BnaC04g54550D	GSBRNA2T00016855001	BnaC04G0180700ZS	7	86	0.0604783	0.751043	3.63441	Up	7.28256e-19	4.55575e-18
BnaCnng73320D	GSBRNA2T00016887001	BnaA07G0081100ZS	1642	328	19.6012	3.95774	-2.30819	Down	6.8225e-207	3.22948e-205
BnaCnng28900D	GSBRNA2T00016916001	BnaC07G0361400ZS	301	94	1.69014	0.533516	-1.66353	Down	4.59136e-26	3.57342e-25
BnaA05g34450D	GSBRNA2T00016983001	BnaA05G0036400ZS	63	221	0.517161	1.83376	1.82612	Up	2.5868e-22	1.8114e-21
BnaA04g29490D	GSBRNA2T00016997001	BnaA04G0300500ZS	542	1254	4.93256	11.5355	1.22567	Up	1.06226e-66	1.69469e-65
BnaA03g54810D	GSBRNA2T00017016001	BnaA03G0006800ZS	241	569	2.09569	5.00135	1.25489	Up	2.5952e-32	2.36529e-31
BnaA03g54860D	GSBRNA2T00017022001	BnaA03G0006300ZS	348	702	1.85629	3.78501	1.02788	Up	4.13498e-29	3.48894e-28
BnaA03g54890D	GSBRNA2T00017025001	BnaA03G0006100ZS	109	305	0.510596	1.44416	1.49998	Up	3.35432e-23	2.41103e-22
BnaA03g54910D	GSBRNA2T00017028001	BnaC02G0004800ZS	584	250	4.42255	1.91366	-1.20854	Down	5.98182e-31	5.28631e-30
BnaA03g54920D	GSBRNA2T00017029001	BnaA10G0297800ZS	325	34	4.75726	0.503057	-3.24134	Down	2.5257e-60	3.71573e-59
BnaC09g41440D	GSBRNA2T00017042001	BnaA10G0201500ZS	35	8	0.573119	0.132413	-2.11379	Down	2.96398e-05	8.67265e-05
BnaA01g36370D	GSBRNA2T00017048001	BnaA01G0313000ZS	25	57	0.16815	0.387522	1.20453	Up	0.000314322	0.000818025
BnaA01g36380D	GSBRNA2T00017049001	BnaA01G0313100ZS	89	435	1.00732	4.97658	2.30463	Up	9.61504e-57	1.348e-55
BnaA01g36400D	GSBRNA2T00017053001	BnaA01G0313400ZS	66	12	0.211353	0.0388427	-2.44394	Down	2.75584e-10	1.18223e-09
BnaC03g77460D	GSBRNA2T00017125001	BnaA08G0154900ZS	60	199	0.55247	1.85215	1.74523	Up	4.18448e-19	2.64089e-18
BnaC03g77470D	GSBRNA2T00017126001	BnaA08G0154800ZS	0	262	0.001	1.86269	10.8632	Up	3.274e-80	6.09598e-79
BnaC03g77480D	GSBRNA2T00017127001	Bnascaffold0025G0008500ZS	237	698	0.073332	0.218306	1.57384	Up	1.30655e-54	1.77803e-53
BnaA01g36520D	GSBRNA2T00017160001	BnaA01G0304600ZS	415	7	2.91238	0.049655	-5.87412	Down	3.83998e-112	9.51212e-111
BnaC02g03490D	GSBRNA2T00017193001	BnaC06G0360200ZS	12	283	0.153397	3.65668	4.57519	Up	2.8533e-69	4.70352e-68
BnaC02g03480D	GSBRNA2T00017194001	BnaC02G0006900ZS	1681	185	10.487	1.1666	-3.16823	Down	1.81619e-298	1.28293e-296
BnaC02g03470D	GSBRNA2T00017195001	BnaC02G0007000ZS	3990	699	14.2455	2.5226	-2.49753	Down	0	0
BnaC02g03460D	GSBRNA2T00017196001	BnaC02G0007100ZS	2660	2	5.28551	0.00401699	-10.3617	Down	0	0
BnaC02g03450D	GSBRNA2T00017197001	BnaC02G0007200ZS	53	0	0.42649	0.001	-8.73637	Down	1.48259e-16	8.5348e-16
BnaC02g03440D	GSBRNA2T00017198001	BnaA02G0009900ZS	271	16	1.86691	0.111414	-4.06665	Down	1.17884e-60	1.7381e-59
BnaC02g03430D	GSBRNA2T00017199001	BnaC02G0007400ZS	13598	1734	125.825	16.2184	-2.95572	Down	0	0
BnaC02g03410D	GSBRNA2T00017201001	BnaC02G0007600ZS	4372	36	22.2098	0.184855	-6.90866	Down	0	0
BnaC02g03390D	GSBRNA2T00017203001	BnaC02G0007800ZS	1392	0	6.82741	0.001	-12.7371	Down	0	0
BnaC02g03380D	GSBRNA2T00017204001	BnaC02G0007900ZS	593	42	2.102	0.150484	-3.80407	Down	1.43843e-124	3.98752e-123
BnaA01g35240D	GSBRNA2T00017227001	BnaA01G0149300ZS	42	114	0.440802	1.20938	1.45607	Up	3.25132e-09	1.30293e-08
BnaCnng73460D	GSBRNA2T00017241001	BnaC01G0119500ZS	0	16	0.001	0.0853943	6.41607	Up	1.3924e-05	4.20645e-05
BnaAnng37990D	GSBRNA2T00017273001	BnaA03G0499900ZS	739	334	4.79853	2.19217	-1.13023	Down	5.66802e-35	5.47341e-34
BnaCnng29220D	GSBRNA2T00017370001	BnaC03G0732500ZS	19	51	0.085135	0.230988	1.43999	Up	9.3436e-05	0.000259086
BnaAnng38020D	GSBRNA2T00017425001	BnaA08G0223500ZS	245	1384	4.34552	24.8128	2.51349	Up	1.2306e-195	5.43561e-194
BnaAnng38060D	GSBRNA2T00017460001	BnaC02G0529100ZS	0	47	0.001	0.515918	9.011	Up	5.487e-15	2.96349e-14
BnaC06g41790D	GSBRNA2T00017472001	BnaA05G0164600ZS	25	4	0.0730974	0.0118219	-2.62836	Down	6.70202e-05	0.000188714
BnaC06g41800D	GSBRNA2T00017474001	BnaC06G0124900ZS	0	41	0.001	1.0287	10.0066	Up	3.627e-13	1.80987e-12
BnaA04g29120D	GSBRNA2T00017490001	BnaA04G0242200ZS	1004	474	10.2173	4.87577	-1.0673	Down	6.6164e-43	7.4659e-42
BnaA04g29140D	GSBRNA2T00017492001	BnaA04G0242400ZS	115	12	0.52405	0.055274	-3.24503	Down	2.71144e-22	1.89778e-21
BnaAnng13930D	GSBRNA2T00017499001	BnaA02G0005500ZS	153	321	2.68832	5.70112	1.08454	Up	2.63578e-15	1.44044e-14
BnaAnng13940D	GSBRNA2T00017500001	BnaA02G0005600ZS	3	23	0.0185065	0.143415	2.9541	Up	4.39074e-05	0.000126178
BnaCnng29560D	GSBRNA2T00017527001	BnaC06G0154800ZS	93	0	1.0278	0.001	-10.0053	Down	1.67057e-28	1.38549e-27
BnaCnng29600D	GSBRNA2T00017551001	BnaC03G0629300ZS	1005	489	5.63977	2.77376	-1.02379	Down	3.1245e-40	3.35723e-39
BnaCnng29610D	GSBRNA2T00017552001	BnaC03G0629200ZS	744	285	9.94414	3.85038	-1.36884	Down	6.25928e-47	7.57467e-46
BnaCnng29690D	GSBRNA2T00017561001	BnaC03G0628400ZS	667	16	4.17221	0.101164	-5.36605	Down	7.71004e-173	3.02636e-171
BnaAnng38150D	GSBRNA2T00017597001	BnaC03G0519200ZS	169	65	2.17516	0.845633	-1.36302	Down	9.09916e-12	4.24009e-11
BnaA09g56740D	GSBRNA2T00017630001	BnaC08G0485600ZS	902	3275	6.73827	24.7296	1.87579	Up	0	0
BnaA06g38170D	GSBRNA2T00017658001	BnaA06G0090800ZS	1	46	0.0054774	0.254681	5.53906	Up	2.71708e-13	1.3639e-12
BnaC04g55800D	GSBRNA2T00017688001	BnaC04G0393000ZS	0	49	0.001	1.61361	10.6561	Up	1.35706e-15	7.50403e-15
BnaC04g55820D	GSBRNA2T00017690001	BnaC04G0393100ZS	0	43	0.001	1.74281	10.7672	Up	8.97036e-14	4.59793e-13
BnaCnng29740D	GSBRNA2T00017709001	BnaA09G0425300ZS	130	667	1.77808	9.22142	2.37467	Up	3.38088e-89	6.92448e-88
BnaCnng73740D	GSBRNA2T00017763001	BnaC09G0192500ZS	12	86	0.605341	4.38512	2.8568	Up	2.24564e-15	1.2309e-14
BnaAnng38300D	GSBRNA2T00017788001	BnaC02G0552900ZS	0	12	0.001	0.234175	7.87145	Up	0.000227634	0.000602622
BnaC06g41650D	GSBRNA2T00017789001	BnaC06G0088400ZS	0	13	0.001	0.0863399	6.43195	Up	0.000113206	0.000311023
BnaCnng29830D	GSBRNA2T00017828001		7	107	0.060146	0.929303	3.94961	Up	1.30651e-24	9.78125e-24
BnaA02g20200D	GSBRNA2T00017868001	BnaA02G0247600ZS	100	227	0.556511	1.27692	1.19819	Up	6.0502e-13	2.98713e-12
BnaA02g20230D	GSBRNA2T00017871001	BnaA02G0247300ZS	23	82	0.169791	0.611878	1.84949	Up	2.72934e-09	1.09988e-08
BnaCnng73880D	GSBRNA2T00017933001	BnaC09G0228900ZS	4678	711	49.5402	7.61083	-2.70247	Down	0	0
BnaC09g52170D	GSBRNA2T00017942001	BnaC09G0245500ZS	0	19	0.001	0.244171	7.93175	Up	1.7126e-06	5.63008e-06
BnaC05g49330D	GSBRNA2T00017947001	BnaA05G0102900ZS	0	86	0.001	0.653552	9.35216	Up	8.09018e-27	6.44009e-26
BnaC05g51090D	GSBRNA2T00017962001	BnaC05G0236200ZS	723	1834	1.91631	4.91352	1.35842	Up	3.93126e-113	9.79782e-112
BnaA05g36890D	GSBRNA2T00017965001	BnaA05G0391400ZS	240	580	1.52153	3.71674	1.28851	Up	3.2048e-34	3.0411e-33
BnaAnng14070D	GSBRNA2T00017974001	BnaC06G0336200ZS	1	90	0.00645308	0.587049	6.50735	Up	2.3132e-26	1.81596e-25
BnaAnng14100D	GSBRNA2T00017978001	BnaC06G0342200ZS	127	263	0.845116	1.76902	1.06573	Up	1.73819e-12	8.3865e-12
BnaAnng14160D	GSBRNA2T00017987001	BnaA07G0295900ZS	27	73	0.160237	0.437912	1.45043	Up	2.45328e-06	7.95867e-06
BnaAnng14170D	GSBRNA2T00017988001	BnaA07G0295800ZS	2139	995	12.8405	6.03754	-1.08867	Down	2.93828e-92	6.17494e-91
BnaA07g37930D	GSBRNA2T00018003001	BnaC06G0211100ZS	783	358	8.04679	3.71885	-1.11356	Down	4.02384e-36	3.98864e-35
BnaA09g54530D	GSBRNA2T00018032001	BnaA09G0436900ZS	0	23	0.001	0.335076	8.38834	Up	1.04757e-07	3.79295e-07
BnaA09g54540D	GSBRNA2T00018033001	BnaA09G0437000ZS	6	69	0.130015	1.51132	3.53906	Up	4.46668e-15	2.42134e-14
BnaAnng38450D	GSBRNA2T00018077001	BnaA02G0390000ZS	26	0	0.40863	0.001	-8.67465	Down	1.72197e-08	6.58564e-08
BnaCnng73940D	GSBRNA2T00018082001	BnaC05G0226700ZS	4	49	0.0254794	0.315493	3.63021	Up	2.96564e-11	1.34427e-10
BnaA03g57310D	GSBRNA2T00018099001	BnaA03G0273500ZS	175	437	1.77129	4.47093	1.33577	Up	1.37041e-27	1.11227e-26
BnaC01g36230D	GSBRNA2T00018117001	BnaC01G0433000ZS	144	13	0.80857	0.0737842	-3.45399	Down	4.50572e-29	3.79695e-28
BnaC01g36130D	GSBRNA2T00018128001	BnaC01G0432300ZS	4610	1817	42.4065	16.8947	-1.32771	Down	2.11286e-268	1.32866e-266
BnaC01g36110D	GSBRNA2T00018130001	BnaC01G0432100ZS	383	155	3.39019	1.38683	-1.28958	Down	6.64602e-23	4.73711e-22
BnaC01g36100D	GSBRNA2T00018131001	BnaC01G0432000ZS	2259	887	9.19154	3.64805	-1.33318	Down	2.22774e-133	6.64002e-132
BnaC01g36090D	GSBRNA2T00018132001	BnaA01G0348700ZS	191	428	1.04925	2.37658	1.17953	Up	1.49383e-22	1.054e-21
BnaC01g36060D	GSBRNA2T00018136001	BnaA01G0348400ZS	162	376	1.34872	3.16417	1.23023	Up	2.85976e-21	1.9392e-20
BnaC01g36040D	GSBRNA2T00018140001	BnaC01G0431300ZS	80	5	0.786816	0.049707	-3.9845	Down	1.43988e-18	8.91994e-18
BnaC01g36020D	GSBRNA2T00018147001	BnaC01G0430100ZS	0	96	0.001	1.07621	10.0717	Up	7.48638e-30	6.43522e-29
BnaC01g35950D	GSBRNA2T00018156001	BnaC01G0429700ZS	82	21	0.444219	0.114992	-1.94974	Down	9.33182e-10	3.87802e-09
BnaC01g35930D	GSBRNA2T00018158001	BnaC01G0429500ZS	1927	794	20.1568	8.39507	-1.26365	Down	4.03614e-105	9.49445e-104
BnaC01g35900D	GSBRNA2T00018161001	BnaC01G0429100ZS	34	0	0.307929	0.001	-8.26645	Down	7.02092e-11	3.11638e-10
BnaC01g35820D	GSBRNA2T00018170001	BnaC01G0428400ZS	38	94	0.328613	0.821664	1.32216	Up	6.02352e-07	2.05291e-06
BnaC01g35690D	GSBRNA2T00018187001	BnaC01G0427200ZS	465	127	2.75964	0.761848	-1.85691	Down	1.2239e-45	1.44929e-44
BnaC01g35640D	GSBRNA2T00018195001	BnaC01G0426600ZS	180	65	2.88208	1.05199	-1.45399	Down	1.44453e-13	7.33197e-13
BnaC01g35600D	GSBRNA2T00018200001	BnaC01G0426200ZS	635	287	8.35633	3.81758	-1.13021	Down	2.77992e-30	2.41765e-29
BnaC01g35590D	GSBRNA2T00018202001	BnaC01G0426100ZS	123	38	0.721752	0.225388	-1.67909	Down	1.21291e-11	5.61348e-11
BnaC01g35550D	GSBRNA2T00018210001	BnaC01G0425700ZS	35	364	0.14303	1.50358	3.39401	Up	3.56692e-71	6.03316e-70
BnaC09g00150D	GSBRNA2T00018234001	BnaA09G0027800ZS	74	282	0.650118	2.50423	1.94559	Up	2.05246e-30	1.79158e-29
BnaC09g00410D	GSBRNA2T00018263001	BnaA02G0257300ZS	12	101	0.0749124	0.637322	3.08874	Up	3.69562e-19	2.33719e-18
BnaC09g00840D	GSBRNA2T00018315001	BnaC09G0018800ZS	12	0	0.100172	0.001	-6.64634	Down	0.000261746	0.000687688
BnaA09g00340D	GSBRNA2T00018360001	BnaA09G0021100ZS	101	227	0.898257	2.04066	1.18383	Up	9.98068e-13	4.87161e-12
BnaA09g00420D	GSBRNA2T00018372001	BnaA09G0022000ZS	180	77	1.60848	0.695501	-1.20957	Down	1.402e-10	6.11936e-10
BnaA09g00510D	GSBRNA2T00018386001	BnaA09G0022600ZS	2313	4586	8.71581	17.4675	1.00297	Up	2.76888e-173	1.09211e-171
BnaA09g00660D	GSBRNA2T00018409001	BnaA09G0023700ZS	197	400	1.62855	3.34241	1.0373	Up	1.68882e-17	1.00871e-16
BnaA09g00760D	GSBRNA2T00018423001	BnaA09G0025300ZS	264	103	1.07232	0.422884	-1.3424	Down	3.35646e-17	1.98137e-16
BnaA09g00770D	GSBRNA2T00018424001	BnaA09G0025400ZS	932	2419	4.1881	10.9876	1.3915	Up	4.3853e-154	1.51101e-152
BnaA09g00810D	GSBRNA2T00018430001	BnaC02G0342400ZS	356	163	1.62702	0.753	-1.11151	Down	3.0801e-17	1.82072e-16
BnaA09g00870D	GSBRNA2T00018439001	BnaA09G0026400ZS	11	42	0.138538	0.534674	1.94838	Up	1.17528e-05	3.57812e-05
BnaA09g01070D	GSBRNA2T00018463001	BnaA09G0028300ZS	1581	699	9.73371	4.34999	-1.16198	Down	4.57766e-76	8.20254e-75
BnaC01g39770D	GSBRNA2T00018513001	BnaA01G0428600ZS	42	4	0.214639	0.0206625	-3.37682	Down	3.43038e-09	1.37318e-08
BnaC01g39760D	GSBRNA2T00018514001	BnaA01G0428500ZS	2474	849	15.5167	5.38235	-1.52751	Down	1.24163e-178	5.01875e-177
BnaC01g39710D	GSBRNA2T00018520001	BnaA01G0427900ZS	4966	2299	40.6942	19.0428	-1.09558	Down	9.2323e-214	4.54017e-212
BnaC01g39580D	GSBRNA2T00018536001	BnaA01G0426700ZS	1905	739	29.7903	11.6813	-1.35065	Down	5.11308e-115	1.29501e-113
BnaC01g39570D	GSBRNA2T00018537001	BnaA01G0426600ZS	50	0	1.77704	0.001	-10.7953	Down	1.16716e-15	6.46912e-15
BnaC01g39560D	GSBRNA2T00018539001	BnaA01G0426500ZS	2179	371	12.4741	2.1468	-2.53868	Down	2e-306	1.4694e-304
BnaC01g39510D	GSBRNA2T00018547001	BnaA01G0424600ZS	2	43	0.00608678	0.132279	4.44176	Up	2.45146e-11	1.11479e-10
BnaC01g39490D	GSBRNA2T00018550001	BnaA01G0424400ZS	217	96	1.27334	0.569402	-1.16109	Down	8.98364e-12	4.18759e-11
BnaC01g39480D	GSBRNA2T00018551001	BnaA01G0424300.2ZS	11618	5572	52.3328	25.3699	-1.0446	Down	0	0
BnaC01g39460D	GSBRNA2T00018554001	BnaA01G0424100ZS	16	2539	0.129306	20.7409	7.32554	Up	0	0
BnaC01g39450D	GSBRNA2T00018555001	BnaA01G0424000ZS	712	5243	4.86565	36.2164	2.89594	Up	0	0
BnaC01g39410D	GSBRNA2T00018560001	Bnascaffold0026G0049600ZS	0	981	0.001	7.32015	12.8377	Up	2.47188e-298	1.74275e-296
BnaC01g39400D	GSBRNA2T00018561001	BnaC04G0437500ZS	0	36	0.001	0.233216	7.86552	Up	1.19231e-11	5.52163e-11
BnaC01g39390D	GSBRNA2T00018563001	BnaA01G0423900ZS	284	643	1.01012	2.3117	1.19442	Up	1.0469e-33	9.83752e-33
BnaC01g39370D	GSBRNA2T00018566001	BnaA05G0451700ZS	2	29	0.0098249	0.143999	3.87348	Up	2.117e-07	7.47171e-07
BnaC01g39340D	GSBRNA2T00018571001	BnaA01G0423300ZS	0	1196	0.001	6.59093	12.6863	Up	0	0
BnaC01g39330D	GSBRNA2T00018573001	BnaA01G0423200ZS	3	821	0.0145244	4.01778	8.11177	Up	1.01647e-242	5.67635e-241
BnaC01g39300D	GSBRNA2T00018576001	BnaA01G0422900ZS	29	337	0.126676	1.48796	3.55412	Up	1.18487e-68	1.93407e-67
BnaC01g39290D	GSBRNA2T00018577001	BnaA01G0422800ZS	386	1063	3.58945	9.99168	1.47696	Up	4.77764e-75	8.478e-74
BnaC01g39280D	GSBRNA2T00018579001	BnaC03G0379600ZS	121	562	0.935957	4.39412	2.23106	Up	4.91148e-70	8.18093e-69
BnaC01g39210D	GSBRNA2T00018589001	BnaA01G0425200ZS	51	246	0.256855	1.25233	2.28559	Up	1.79713e-32	1.64405e-31
BnaC01g39150D	GSBRNA2T00018598001	BnaC01G0481700ZS	0	42	0.001	1.02928	10.0074	Up	1.80376e-13	9.11614e-13
BnaC01g39110D	GSBRNA2T00018603001	BnaC01G0481200ZS	592	212	5.61071	2.03094	-1.46604	Down	1.29991e-41	1.43092e-40
BnaC01g39070D	GSBRNA2T00018609001	Bnascaffold0027G0000200ZS	2620	513	28.1591	5.57313	-2.33704	Down	0	0
BnaC01g39060D	GSBRNA2T00018610001	Bnascaffold0027G0000300.1ZS	2	667	0.00976864	3.29302	8.39704	Up	2.54172e-198	1.14125e-196
BnaC01g39050D	GSBRNA2T00018612001	Bnascaffold0027G0000400ZS	1	416	0.00274591	1.15463	8.71594	Up	1.31767e-124	3.65552e-123
BnaC01g39020D	GSBRNA2T00018617001	Bnascaffold0025G0033100ZS	231	1221	1.18245	6.31756	2.41759	Up	3.21196e-165	1.19609e-163
BnaC01g39010D	GSBRNA2T00018618001	Bnascaffold0025G0033200ZS	25	366	0.199974	2.95923	3.88734	Up	6.74918e-80	1.25315e-78
BnaC01g39000D	GSBRNA2T00018619001	BnaC05G0501700ZS	752	1585	12.5997	26.8434	1.09117	Up	6.54538e-70	1.08827e-68
BnaC01g38990D	GSBRNA2T00018621001	Bnascaffold0025G0033300ZS	344	1517	2.41955	10.7851	2.15624	Up	2.9903e-178	1.20538e-176
BnaC01g38970D	GSBRNA2T00018624001	BnaC01G0480000ZS	5	567	0.0432785	4.96078	6.84077	Up	1.59185e-162	5.80981e-161
BnaC01g38950D	GSBRNA2T00018626001	BnaC01G0479800ZS	205	1336	1.06504	7.01593	2.71972	Up	3.0823e-206	1.4534e-204
BnaC01g38930D	GSBRNA2T00018628001	BnaA05G0336400ZS	0	150	0.001	3.40339	11.7328	Up	3.10718e-46	3.71782e-45
BnaC01g38860D	GSBRNA2T00018639001	BnaC01G0479300ZS	30	122	0.413338	1.69906	2.03934	Up	8.64946e-15	4.63837e-14
BnaC02g25420D	GSBRNA2T00018664001	BnaC02G0316000ZS	1159	2896	12.2187	30.8606	1.33668	Up	3.25436e-173	1.28221e-171
BnaC02g25950D	GSBRNA2T00018756001	Bnascaffold0156G0000100ZS	3252	848	36.4986	9.62024	-1.9237	Down	0	0
BnaA06g36330D	GSBRNA2T00018780001	BnaA06G0438000ZS	1620	753	17.0788	8.02419	-1.08978	Down	1.95685e-70	3.27211e-69
BnaA06g36680D	GSBRNA2T00018823001	BnaC07G0220600ZS	189	486	0.560653	1.45725	1.37807	Up	6.514e-32	5.88137e-31
BnaA06g36710D	GSBRNA2T00018828001	BnaA06G0441900ZS	2	28	0.0102042	0.144402	3.82285	Up	3.99926e-07	1.38405e-06
BnaA06g36790D	GSBRNA2T00018837001	BnaA06G0442300ZS	123	271	0.339636	0.756384	1.15513	Up	2.13166e-14	1.12341e-13
BnaA06g36830D	GSBRNA2T00018843001	BnaA06G0442800ZS	29	79	0.487635	1.34273	1.4613	Up	8.16116e-07	2.75405e-06
BnaA06g37140D	GSBRNA2T00018879001	BnaA10G0106400ZS	0	13	0.001	0.11947	6.90051	Up	0.000113206	0.000311082
BnaA06g37240D	GSBRNA2T00018892001	BnaA06G0449400ZS	44	6	0.49383	0.0680677	-2.85897	Down	2.2611e-08	8.58396e-08
BnaA06g37320D	GSBRNA2T00018902001	BnaA06G0450300ZS	131	64	3.02745	1.49503	-1.01793	Down	1.95745e-06	6.40371e-06
BnaA06g37380D	GSBRNA2T00018908001	BnaA06G0451000ZS	39	78	0.292275	0.590863	1.0155	Up	0.000233632	0.000617185
BnaC03g61420D	GSBRNA2T00018948001	BnaC03G0687900ZS	203	516	1.16925	3.00417	1.36139	Up	3.43874e-33	3.19851e-32
BnaC03g61620D	GSBRNA2T00018994001	BnaC03G0689600ZS	101	247	0.0615684	0.152194	1.30565	Up	9.43686e-16	5.2539e-15
BnaC03g61630D	GSBRNA2T00018995001	BnaC03G0689700ZS	34	77	1.02248	2.34063	1.19482	Up	3.06008e-05	8.93565e-05
BnaC03g61650D	GSBRNA2T00018997001	BnaC03G0689800ZS	0	204	0.001	2.67601	11.3859	Up	1.28961e-62	1.95449e-61
BnaC03g22790D	GSBRNA2T00019019001	BnaC03G0234300ZS	855	286	10.8703	3.67541	-1.56441	Down	3.95284e-65	6.19171e-64
BnaC03g22990D	GSBRNA2T00019051001	BnaA03G0200600ZS	0	23	0.001	0.341903	8.41744	Up	1.04757e-07	3.79182e-07
BnaC03g23000D	GSBRNA2T00019052001		0	110	0.001	5.51985	12.4304	Up	4.23752e-34	4.01327e-33
BnaC03g23020D	GSBRNA2T00019054001	BnaC06G0353900ZS	0	851	0.001	7.04273	12.7819	Up	6.77562e-259	4.02927e-257
BnaC03g23030D	GSBRNA2T00019055001	BnaA03G0200600ZS	1	18	0.0121539	0.221132	4.18542	Up	3.63346e-05	0.000105274
BnaC03g23080D	GSBRNA2T00019062001		28	146	0.174447	0.919442	2.39797	Up	5.76276e-21	3.87086e-20
BnaC03g23090D	GSBRNA2T00019063001	BnaA04G0092000ZS	108	1778	0.847274	14.0993	4.05665	Up	0	0
BnaC03g23190D	GSBRNA2T00019082001	BnaA04G0081100ZS	88	43	1.34696	0.66528	-1.01767	Down	9.9178e-05	0.000274261
BnaC03g23340D	GSBRNA2T00019106001	BnaC03G0239400ZS	77	172	0.490811	1.1082	1.17497	Up	6.98022e-10	2.92363e-09
BnaC03g23380D	GSBRNA2T00019114001	BnaC03G0239900ZS	147	54	0.862582	0.320289	-1.42929	Down	4.36658e-11	1.96099e-10
BnaC03g23520D	GSBRNA2T00019134001	BnaC03G0241200ZS	317	24743	2.59995	205.127	6.30189	Up	0	0
BnaC05g24090D	GSBRNA2T00019182001	BnaC03G0642400ZS	84	1240	0.434244	6.4795	3.8993	Up	2.17686e-267	1.36656e-265
BnaC05g24140D	GSBRNA2T00019191001	BnaC05G0279400ZS	12	0	0.0832175	0.001	-6.37882	Down	0.000261746	0.000687639
BnaC08g42430D	GSBRNA2T00019272001	BnaC08G0522600ZS	0	12	0.001	0.0714882	6.15963	Up	0.000227634	0.000602752
BnaC08g42610D	GSBRNA2T00019296001	BnaC08G0524300ZS	0	17	0.001	0.349739	8.45014	Up	6.9246e-06	2.15524e-05
BnaC08g43190D	GSBRNA2T00019357001	BnaC08G0531100ZS	27	2	0.316273	0.0236807	-3.73939	Down	9.98372e-07	3.34538e-06
BnaCnng30090D	GSBRNA2T00019447001		2244	688	39.1356	12.1284	-1.6901	Down	1.90021e-187	8.07235e-186
BnaAnng14260D	GSBRNA2T00019485001	BnaC09G0020900ZS	0	211	0.001	1.17095	10.1935	Up	9.70238e-65	1.51138e-63
BnaUnng04540D	GSBRNA2T00019533001	Bnascaffold0027G0033600ZS	0	19	0.001	0.390039	8.60747	Up	1.7126e-06	5.62957e-06
BnaAnng38530D	GSBRNA2T00019541001	BnaC01G0500000ZS	2580	182	15.7294	1.12158	-3.80986	Down	0	0
BnaCnng74090D	GSBRNA2T00019550001	BnaC09G0150600ZS	0	103	0.001	1.23341	10.2684	Up	5.63238e-32	5.09667e-31
BnaA09g55670D	GSBRNA2T00019599001	BnaC08G0420000ZS	598	260	4.31276	1.89536	-1.18614	Down	8.91968e-31	7.85418e-30
BnaA09g55750D	GSBRNA2T00019609001	BnaA09G0569200ZS	162	19	1.65039	0.195655	-3.07643	Down	2.16566e-29	1.84107e-28
BnaCnng30500D	GSBRNA2T00019640001	BnaC03G0530900ZS	10	44	0.11832	0.52623	2.153	Up	1.69871e-06	5.59017e-06
BnaA07g38610D	GSBRNA2T00019702001	BnaA07G0278600ZS	18976	9095	111.002	53.7768	-1.04553	Down	0	0
BnaA07g38640D	GSBRNA2T00019705001	BnaA07G0278300ZS	2617	1228	42.1179	19.9768	-1.07611	Down	2.19536e-110	5.37284e-109
BnaA07g38660D	GSBRNA2T00019708001	BnaA07G0278100ZS	2879	686	12.3291	2.96946	-2.05379	Down	0	0
BnaA03g55890D	GSBRNA2T00019724001	BnaA03G0037300ZS	25386	7966	151.233	47.9685	-1.65661	Down	0	0
BnaC01g41550D	GSBRNA2T00019756001	BnaC01G0179000ZS	3	21	0.0145244	0.102769	2.82285	Up	0.000141085	0.000382954
BnaCnng30760D	GSBRNA2T00019795001	BnaA05G0125700ZS	126	35	0.498201	0.139884	-1.8325	Down	3.03848e-13	1.52117e-12
BnaCnng30770D	GSBRNA2T00019797001	BnaC04G0163300ZS	0	37	0.001	1.23127	10.2659	Up	5.92954e-12	2.78736e-11
BnaAnng38610D	GSBRNA2T00019801001	BnaA03G0488900ZS	796	57	4.32216	0.312844	-3.78824	Down	4.26314e-166	1.59401e-164
BnaAnng38660D	GSBRNA2T00019836001	BnaC03G0018000ZS	3	143	0.0325791	1.56971	5.5904	Up	2.7774e-39	2.92849e-38
BnaA02g11230D	GSBRNA2T00019888001	BnaC02G0191900ZS	83	208	0.421185	1.0669	1.3409	Up	5.34966e-14	2.77368e-13
BnaCnng30930D	GSBRNA2T00019909001	BnaC09G0037400ZS	12	0	0.40356	0.001	-8.65664	Down	0.000261746	0.000687713
BnaC02g48540D	GSBRNA2T00019921001	BnaC02G0506900ZS	0	68	0.001	0.934665	9.86831	Up	2.33666e-21	1.58949e-20
BnaC01g38640D	GSBRNA2T00019939001	Bnascaffold2727G0000100ZS	71	507	0.180781	1.30487	2.85159	Up	2.09918e-83	4.05475e-82
BnaC01g38650D	GSBRNA2T00019941001	BnaC01G0478100ZS	26	236	0.118194	1.08442	3.1977	Up	2.78024e-44	3.21285e-43
BnaC01g38660D	GSBRNA2T00019943001	Bnascaffold0106G0000200ZS	13	193	0.124212	1.86398	3.90751	Up	5.49682e-43	6.21597e-42
BnaC01g38670D	GSBRNA2T00019944001	BnaA01G0380800ZS	422	987	2.74968	6.50056	1.2413	Up	6.60386e-54	8.90264e-53
BnaC01g38680D	GSBRNA2T00019945001	BnaA01G0380900ZS	4280	11074	33.3818	87.3042	1.38699	Up	0	0
BnaC01g38710D	GSBRNA2T00019948001	BnaC01G0478500ZS	31	1029	0.135476	4.54548	5.06833	Up	1.88183e-262	1.14129e-260
BnaAnng38710D	GSBRNA2T00020000001	BnaA03G0073900ZS	1602	3182	24.5608	49.3111	1.00556	Up	2.38526e-121	6.40639e-120
BnaCnng74290D	GSBRNA2T00020004001	Bnascaffold0025G0028300ZS	76	198	0.604827	1.59275	1.39693	Up	3.66716e-14	1.91501e-13
BnaC09g50860D	GSBRNA2T00020035001	BnaC09G0073500ZS	0	75	0.001	2.60552	11.3474	Up	1.75798e-23	1.27296e-22
BnaAnng14430D	GSBRNA2T00020070001	BnaA09G0521400ZS	167	79	1.05517	0.504541	-1.06443	Down	2.46244e-08	9.32804e-08
BnaA01g35970D	GSBRNA2T00020078001	BnaA01G0277700ZS	175	359	2.20697	4.57633	1.05212	Up	3.38592e-16	1.91874e-15
BnaA02g36110D	GSBRNA2T00020088001	BnaC02G0319500ZS	16	58	0.167363	0.613242	1.87348	Up	4.83062e-07	1.66024e-06
BnaA02g36180D	GSBRNA2T00020097001	BnaA02G0237300ZS	642	1570	3.98659	9.85443	1.30562	Up	1.78003e-91	3.71632e-90
BnaA02g36200D	GSBRNA2T00020099001	BnaA02G0236900ZS	26	6	0.159134	0.0371198	-2.09998	Down	0.000363532	0.00093979
BnaA02g36210D	GSBRNA2T00020100001	BnaA02G0236700ZS	40	82	0.145413	0.301316	1.05112	Up	0.000103657	0.000286001
BnaAnng38780D	GSBRNA2T00020182001	BnaC05G0268900ZS	72	21	1.21285	0.357569	-1.76211	Down	8.82078e-08	3.21087e-07
BnaC09g54090D	GSBRNA2T00020195001	BnaC09G0460900ZS	941	205	2.30287	0.507105	-2.18307	Down	1.51467e-111	3.74191e-110
BnaCnng31310D	GSBRNA2T00020238001	BnaC05G0325300ZS	13	0	0.146254	0.001	-7.19234	Down	0.000131576	0.000358498
BnaC09g53000D	GSBRNA2T00020262001	BnaA10G0096100ZS	0	13	0.001	0.0780338	6.28603	Up	0.000113206	0.00031093
BnaC07g49950D	GSBRNA2T00020294001	BnaC07G0381400ZS	35	7	0.810857	0.163923	-2.30643	Down	1.04913e-05	3.20924e-05
BnaC04g56050D	GSBRNA2T00020301001	BnaC02G0186600ZS	10	190	0.113319	2.1763	4.26342	Up	5.8455e-45	6.84461e-44
BnaA04g27390D	GSBRNA2T00020416001	BnaA04G0016100ZS	85	201	1.37744	3.29241	1.25716	Up	2.00488e-12	9.64655e-12
BnaA04g27410D	GSBRNA2T00020418001	BnaA04G0015900ZS	7	32	0.0639527	0.295512	2.20814	Up	3.6654e-05	0.000106136
BnaA09g03450D	GSBRNA2T00020430001	BnaC09G0040000ZS	30	72	0.329606	0.799596	1.27853	Up	2.13982e-05	6.34572e-05
BnaAnng38880D	GSBRNA2T00020518001	BnaA02G0418000ZS	15	94	0.203973	1.29204	2.66319	Up	1.38877e-15	7.67416e-15
BnaCnng31610D	GSBRNA2T00020620001	BnaA03G0210100ZS	61	26	0.609531	0.262606	-1.2148	Down	0.00019173	0.000512439
BnaCnng74670D	GSBRNA2T00020648001	BnaC04G0264500ZS	0	12	0.001	0.21433	7.74369	Up	0.000227634	0.000602252
BnaAnng38910D	GSBRNA2T00020649001	BnaC04G0545000ZS	264	694	2.86696	7.61802	1.40989	Up	2.22094e-46	2.66132e-45
BnaAnng38950D	GSBRNA2T00020677001	BnaA05G0321900.1ZS	1919	4399	15.246	35.3265	1.21232	Up	2.71344e-225	1.41205e-223
BnaAnng38960D	GSBRNA2T00020679001	BnaC09G0522700ZS	0	347	0.001	2.9098	11.5067	Up	5.3548e-106	1.26737e-104
BnaC04g44230D	GSBRNA2T00020688001	BnaC04G0529500ZS	28	78	0.415693	1.17051	1.49354	Up	6.3587e-07	2.16392e-06
BnaCnng31700D	GSBRNA2T00020720001	BnaC06G0211000ZS	82	36	1.06859	0.474205	-1.17213	Down	2.53876e-05	7.4831e-05
BnaC03g73330D	GSBRNA2T00020770001	BnaC03G0396300ZS	12	43	0.151335	0.54814	1.8568	Up	1.75038e-05	5.23251e-05
BnaA08g20270D	GSBRNA2T00020796001	BnaA08G0234900ZS	580	240	5.02031	2.0998	-1.25752	Down	1.26749e-32	1.16417e-31
BnaA08g20260D	GSBRNA2T00020798001	BnaA08G0234800ZS	13	0	0.501959	0.001	-8.97143	Down	0.000131576	0.000358458
BnaA08g20250D	GSBRNA2T00020799001	BnaA08G0234700ZS	10	36	0.150365	0.54716	1.86349	Up	8.48448e-05	0.000236264
BnaAnng38980D	GSBRNA2T00020810001	BnaC01G0217300ZS	2	63	0.0333907	1.06316	4.99278	Up	4.29212e-17	2.52456e-16
BnaCnng74800D	GSBRNA2T00020816001	BnaC03G0687900ZS	14	45	0.121854	0.395904	1.69999	Up	3.53912e-05	0.000102695
BnaUnng04680D	GSBRNA2T00020831001	BnaA01G0341200ZS	30	8	0.200059	0.0539252	-1.89139	Down	0.000333622	0.000865948
BnaAnng39050D	GSBRNA2T00020836001	BnaA02G0418500ZS	0	12	0.001	0.120306	6.91056	Up	0.000227634	0.000603013
BnaAnng39060D	GSBRNA2T00020838001	BnaA03G0105500ZS	309	124	2.03744	0.826443	-1.30177	Down	4.9896e-19	3.13929e-18
BnaCnng31820D	GSBRNA2T00020915001	BnaC09G0177100ZS	68	217	0.828609	2.67279	1.68958	Up	7.62426e-20	4.9389e-19
BnaCnng31910D	GSBRNA2T00020927001	BnaC09G0417000ZS	16771	1309	152.775	12.0531	-3.66394	Down	0	0
BnaAnng39140D	GSBRNA2T00020997001	BnaC03G0120500ZS	74	380	0.521265	2.70567	2.3759	Up	1.41077e-51	1.83897e-50
BnaA08g05730D	GSBRNA2T00021053001	BnaA08G0093600ZS	25	84	0.258052	0.876419	1.76396	Up	5.64228e-09	2.23108e-08
BnaA08g06050D	GSBRNA2T00021107001	BnaA08G0098900ZS	73	31	0.859401	0.368892	-1.22013	Down	4.14892e-05	0.000119524
BnaA06g02940D	GSBRNA2T00021121001	BnaC06G0045700ZS	77	201	0.271505	0.716387	1.39976	Up	2.14816e-14	1.13202e-13
BnaA06g02750D	GSBRNA2T00021144001	BnaA06G0029700ZS	52	139	0.441543	1.19302	1.434	Up	1.01127e-10	4.45022e-10
BnaA06g02740D	GSBRNA2T00021145001	BnaC06G0048900ZS	331	113	0.841197	0.290277	-1.53501	Down	1.49241e-25	1.14656e-24
BnaA06g02680D	GSBRNA2T00021151001	BnaC06G0049400ZS	11	41	0.0531192	0.200128	1.91362	Up	1.89505e-05	5.64863e-05
BnaA06g02640D	GSBRNA2T00021158001	BnaA06G0028200ZS	2699	1107	16.9733	7.0368	-1.27027	Down	1.20878e-147	3.97986e-146
BnaA06g02420D	GSBRNA2T00021183001	BnaA06G0024500ZS	26	4	0.695021	0.108081	-2.68494	Down	3.8463e-05	0.000111186
BnaA06g02190D	GSBRNA2T00021212001	BnaC06G0058000ZS	128	288	2.93642	6.67829	1.18542	Up	8.72558e-16	4.86455e-15
BnaA06g02010D	GSBRNA2T00021236001	BnaA06G0021000ZS	4777	721	39.7354	6.06209	-2.71254	Down	0	0
BnaA01g18180D	GSBRNA2T00021241001	BnaA01G0191700ZS	745	1609	4.02428	8.78522	1.12635	Up	1.40607e-74	2.48128e-73
BnaA01g18270D	GSBRNA2T00021254001	BnaA01G0192300ZS	260	107	1.3478	0.560662	-1.2654	Down	1.29595e-15	7.1726e-15
BnaA01g18450D	GSBRNA2T00021277001	BnaA01G0195500.1ZS	561	32	1.81258	0.104508	-4.11636	Down	5.23676e-125	1.45998e-123
BnaA01g18460D	GSBRNA2T00021278001	BnaA01G0195600ZS	775	314	7.41249	3.03569	-1.28794	Down	1.34451e-44	1.56382e-43
BnaA01g18500D	GSBRNA2T00021282001	BnaA01G0196000ZS	3	23	0.0638284	0.494636	2.9541	Up	4.39074e-05	0.000126192
BnaA01g18510D	GSBRNA2T00021283001	BnaC01G0247100ZS	6	121	0.0798534	1.62777	4.3494	Up	1.79231e-29	1.52545e-28
BnaA01g18530D	GSBRNA2T00021285001	BnaA01G0196200ZS	70	26	0.39854	0.149628	-1.41335	Down	6.98036e-06	2.17011e-05
BnaA01g18650D	GSBRNA2T00021309001	BnaA01G0197600ZS	80	36	0.510627	0.232264	-1.13651	Down	4.95306e-05	0.000141489
BnaA01g18660D	GSBRNA2T00021310001	BnaA01G0197700ZS	4	22	0.0279249	0.155246	2.47493	Up	0.000279962	0.000732921
BnaA01g18740D	GSBRNA2T00021319001	BnaA01G0198500ZS	4197	1994	44.9538	21.5882	-1.0582	Down	3.77888e-171	1.46216e-169
BnaC03g41180D	GSBRNA2T00021348001	BnaC05G0165600ZS	80	162	0.850082	1.74001	1.03342	Up	6.90926e-08	2.53342e-07
BnaC07g31350D	GSBRNA2T00021518001	BnaC07G0383600ZS	143	373	1.44428	3.80793	1.39866	Up	2.14558e-25	1.64166e-24
BnaC07g31200D	GSBRNA2T00021537001	BnaC02G0430400ZS	0	16	0.001	0.155637	7.28204	Up	1.3924e-05	4.20715e-05
BnaC07g31190D	GSBRNA2T00021539001	BnaC01G0384700ZS	0	18	0.001	0.294843	8.2038	Up	3.4437e-06	1.10321e-05
BnaC07g31160D	GSBRNA2T00021544001	BnaA03G0407600ZS	18	54	0.111626	0.338494	1.60046	Up	1.37871e-05	4.16905e-05
BnaC07g31150D	GSBRNA2T00021545001	BnaC07G0380200ZS	106	317	0.58677	1.77372	1.59591	Up	3.45348e-26	2.69612e-25
BnaC09g18580D	GSBRNA2T00021589001	BnaC09G0236100ZS	377	1014	2.47537	6.7298	1.44292	Up	2.83106e-69	4.67001e-68
BnaC09g18750D	GSBRNA2T00021628001	BnaC09G0234100ZS	0	21	0.001	0.174249	7.445	Up	4.23564e-07	1.46274e-06
BnaC09g18810D	GSBRNA2T00021637001	BnaC09G0233100ZS	1905	941	16.3235	8.15027	-1.00203	Down	3.8114e-72	6.51733e-71
BnaC09g18940D	GSBRNA2T00021659001		58	0	1.83233	0.001	-10.8395	Down	4.75884e-18	2.89667e-17
BnaC09g18950D	GSBRNA2T00021660001	BnaC09G0231900ZS	840	47	2.09337	0.118394	-4.14416	Down	3.03746e-187	1.28737e-185
BnaC09g18960D	GSBRNA2T00021661001	BnaC09G0231800ZS	41	0	2.13719	0.001	-11.0615	Down	5.69466e-13	2.81443e-12
BnaC09g18980D	GSBRNA2T00021663001	BnaC09G0231600ZS	1053	0	1.43919	0.001	-10.491	Down	0	0
BnaC09g19000D	GSBRNA2T00021665001	BnaC09G0231300ZS	62	0	0.27273	0.001	-8.09133	Down	3.03868e-19	1.92671e-18
BnaC09g19010D	GSBRNA2T00021668001	BnaC09G0231200ZS	15	0	0.0394234	0.001	-5.30098	Down	3.32482e-05	9.67442e-05
BnaC09g19020D	GSBRNA2T00021669001	BnaC09G0231100ZS	185	84	1.65789	0.760902	-1.12357	Down	8.62374e-10	3.59272e-09
BnaC09g19060D	GSBRNA2T00021674001	BnaA06G0431300ZS	0	16	0.001	0.242405	7.92128	Up	1.3924e-05	4.20957e-05
BnaA04g06040D	GSBRNA2T00021681001	BnaA04G0058700ZS	6	29	0.0584597	0.285606	2.28851	Up	6.10114e-05	0.000172604
BnaA04g05930D	GSBRNA2T00021697001	BnaA08G0048700ZS	4	56	0.0429418	0.607677	3.82285	Up	3.64632e-13	1.81852e-12
BnaA04g05890D	GSBRNA2T00021703001	BnaA04G0060000ZS	178	373	1.60282	3.39498	1.08279	Up	1.68334e-17	1.00552e-16
BnaA04g05810D	GSBRNA2T00021713001	BnaA04G0060900ZS	200	98	1.72478	0.854267	-1.01365	Down	4.49512e-09	1.78652e-08
BnaA04g05790D	GSBRNA2T00021715001	BnaA04G0061100ZS	4951	1955	31.3667	12.5195	-1.32506	Down	3.2279e-287	2.17137e-285
BnaA04g05780D	GSBRNA2T00021716001	BnaA04G0061200ZS	446	219	8.17328	4.05668	-1.01062	Down	2.1983e-18	1.35359e-17
BnaA04g05640D	GSBRNA2T00021734001	BnaA04G0062400ZS	34	279	0.251787	2.08845	3.05215	Up	7.53954e-50	9.54952e-49
BnaA04g05620D	GSBRNA2T00021736001	BnaA04G0062700ZS	98	1	1.51735	0.0156503	-6.59921	Down	2.69368e-28	2.22445e-27
BnaA04g05540D	GSBRNA2T00021745001	BnaA04G0063400ZS	72	192	0.295909	0.797612	1.43053	Up	3.16554e-14	1.65779e-13
BnaA08g13030D	GSBRNA2T00021800001	BnaA08G0155000ZS	78	2	0.61656	0.01598	-5.26991	Down	4.15148e-21	2.80242e-20
BnaA08g12940D	GSBRNA2T00021811001	BnaA08G0154300ZS	124	43	0.553504	0.194014	-1.51244	Down	2.78566e-10	1.19453e-09
BnaA08g12920D	GSBRNA2T00021813001	BnaA08G0154200ZS	17	0	0.141784	0.001	-7.14755	Down	8.40156e-06	2.59238e-05
BnaA08g12900D	GSBRNA2T00021815001	BnaA08G0154000ZS	209	95	1.09005	0.500828	-1.12201	Down	7.35924e-11	3.2628e-10
BnaA08g12710D	GSBRNA2T00021842001	BnaA08G0152100ZS	75	35	0.965306	0.455341	-1.08404	Down	0.000156377	0.000422027
BnaA08g12080D	GSBRNA2T00021928001	BnaA08G0145000ZS	95	35	0.669695	0.249394	-1.42508	Down	1.30876e-07	4.69599e-07
BnaC04g49490D	GSBRNA2T00022030001	BnaC04G0598700ZS	92	21	0.862353	0.198967	-2.11575	Down	7.83078e-12	3.65974e-11
BnaC04g49640D	GSBRNA2T00022046001	BnaC04G0600100ZS	1615	4545	8.64908	24.6035	1.50824	Up	0	0
BnaC04g49940D	GSBRNA2T00022084001	BnaA01G0410800ZS	137	467	0.64272	2.21454	1.78474	Up	4.94062e-44	5.69056e-43
BnaC06g24860D	GSBRNA2T00022160001	BnaC06G0302300ZS	37	83	0.406038	0.920679	1.18108	Up	1.78313e-05	5.32694e-05
BnaC06g25060D	GSBRNA2T00022183001	BnaC06G0303800ZS	0	30	0.001	0.592756	9.2113	Up	7.88138e-10	3.29167e-09
BnaC06g25150D	GSBRNA2T00022198001	BnaC06G0304400ZS	65	242	0.68449	2.57593	1.91199	Up	9.45722e-26	7.30466e-25
BnaAnng14510D	GSBRNA2T00022216001	BnaA07G0140500ZS	2498	1192	9.96098	4.80453	-1.05189	Down	1.11355e-101	2.54359e-100
BnaA07g36480D	GSBRNA2T00022240001	BnaA07G0092600ZS	19	129	0.129465	0.888489	2.7788	Up	8.69568e-22	5.9958e-21
BnaCnng32080D	GSBRNA2T00022260001	BnaC03G0406200ZS	2739	1325	16.5482	8.09172	-1.03216	Down	5.80434e-108	1.38991e-106
BnaAnng14640D	GSBRNA2T00022272001	BnaA04G0176300ZS	2324	989	12.4817	5.36908	-1.21707	Down	2.968e-119	7.82534e-118
BnaC08g48860D	GSBRNA2T00022277001	BnaC08G0387800ZS	811	4962	4.24871	26.2759	2.62864	Up	0	0
BnaC08g48890D	GSBRNA2T00022281001	BnaA09G0540600ZS	424	189	2.08944	0.941437	-1.15018	Down	2.70802e-21	1.83767e-20
BnaC07g48690D	GSBRNA2T00022288001	BnaC07G0264000ZS	3	127	0.0211801	0.906306	5.41922	Up	1.40415e-34	1.34443e-33
BnaA05g33530D	GSBRNA2T00022312001	BnaC05G0571000ZS	168	346	1.17811	2.45254	1.05781	Up	8.64894e-16	4.82219e-15
BnaA05g33520D	GSBRNA2T00022313001	BnaC05G0571100ZS	168	548	3.88253	12.8012	1.72121	Up	6.32544e-49	7.90524e-48
BnaA05g33510D	GSBRNA2T00022314001	BnaC05G0571200ZS	7823	2363	29.7654	9.08797	-1.71161	Down	0	0
BnaA05g33490D	GSBRNA2T00022316001	BnaC05G0571400ZS	8401	4077	43.5015	21.3392	-1.02756	Down	0	0
BnaA05g33480D	GSBRNA2T00022317001	BnaC05G0571500ZS	1352	573	11.3365	4.85647	-1.22299	Down	1.10714e-70	1.85806e-69
BnaA05g33470D	GSBRNA2T00022318001	BnaC05G0568800ZS	933	343	6.30701	2.34369	-1.42817	Down	3.57902e-62	5.39191e-61
BnaCnng75010D	GSBRNA2T00022357001	BnaC02G0012600.1ZS	31	8	0.584069	0.152355	-1.9387	Down	0.00020775	0.000553057
BnaC04g56810D	GSBRNA2T00022383001	BnaC04G0579500ZS	606	1420	3.53385	8.37006	1.244	Up	5.03004e-77	9.08194e-76
BnaAnng14700D	GSBRNA2T00022398001	BnaC09G0349000ZS	0	225	0.001	2.63122	11.3615	Up	5.49184e-69	9.00443e-68
BnaCnng32230D	GSBRNA2T00022426001	BnaC03G0365200ZS	0	13	0.001	0.137451	7.10277	Up	0.000113206	0.000310977
BnaC08g46530D	GSBRNA2T00022446001	BnaC08G0065200ZS	47	213	0.407194	1.86529	2.19562	Up	5.0033e-27	4.00455e-26
BnaAnng39270D	GSBRNA2T00022488001	BnaA07G0133600ZS	0	17	0.001	0.211866	7.72701	Up	6.9246e-06	2.15515e-05
BnaUnng04730D	GSBRNA2T00022523001	BnaC02G0516200ZS	63	142	1.16591	2.6563	1.18796	Up	1.61031e-08	6.1718e-08
BnaA07g38330D	GSBRNA2T00022541001	BnaA07G0225600ZS	97	33	1.02147	0.351263	-1.54002	Down	1.60714e-08	6.1603e-08
BnaC01g41600D	GSBRNA2T00022549001	BnaC01G0190500ZS	76	1	1.59528	0.0212172	-6.23243	Down	7.85506e-22	5.42128e-21
BnaC01g41610D	GSBRNA2T00022550001	BnaC01G0190600ZS	102	994	2.12676	20.9493	3.30017	Up	1.09825e-186	4.64402e-185
BnaCnng32370D	GSBRNA2T00022599001		36	87	0.689347	1.68391	1.28851	Up	2.54376e-06	8.24417e-06
BnaAnng39320D	GSBRNA2T00022656001	BnaA09G0050500ZS	5119	10773	46.0945	98.054	1.08898	Up	0	0
BnaC09g52180D	GSBRNA2T00022692001	BnaC09G0242000ZS	51	107	1.46337	3.10336	1.08454	Up	5.26682e-06	1.65913e-05
BnaC02g47450D	GSBRNA2T00022707001	BnaC02G0392700ZS	55	3	0.199325	0.0109897	-4.1809	Down	1.58051e-13	8.00719e-13
BnaC02g45240D	GSBRNA2T00022723001	BnaC02G0200400ZS	268	61	1.27774	0.293969	-2.11986	Down	8.1127e-32	7.30591e-31
BnaA07g38820D	GSBRNA2T00022759001	BnaA07G0317900ZS	161	472	0.75343	2.23267	1.56722	Up	2.9543e-37	3.0015e-36
BnaC08g47770D	GSBRNA2T00022767001	BnaC08G0137800ZS	62	21	0.94284	0.322798	-1.54638	Down	6.2479e-06	1.95308e-05
BnaC08g47780D	GSBRNA2T00022768001	BnaC08G0137800ZS	71	33	1.10112	0.517315	-1.08986	Down	0.000221348	0.000587401
BnaAnng39400D	GSBRNA2T00022820001	BnaA08G0119000ZS	10	64	0.105662	0.683539	2.69357	Up	3.8249e-11	1.72417e-10
BnaAnng39440D	GSBRNA2T00022834001	BnaC03G0650700ZS	28	6	0.587736	0.127303	-2.2069	Down	0.000132458	0.000360728
BnaCnng75360D	GSBRNA2T00022836001	BnaC01G0256900ZS	7	36	0.0829286	0.431096	2.37807	Up	4.49812e-06	1.42518e-05
BnaAnng39460D	GSBRNA2T00022839001	BnaA09G0504400ZS	653	298	5.13145	2.36705	-1.11627	Down	1.63724e-30	1.43323e-29
BnaA06g37950D	GSBRNA2T00022857001	BnaA06G0063400ZS	310	615	1.54552	3.09922	1.00381	Up	8.82604e-25	6.64086e-24
BnaA06g37970D	GSBRNA2T00022859001	BnaC05G0078800ZS	3	139	0.0171741	0.804326	5.54947	Up	4.17998e-38	4.32161e-37
BnaA07g38390D	GSBRNA2T00022867001	BnaA07G0234200ZS	791	370	5.46121	2.58213	-1.08066	Down	7.96794e-35	7.67315e-34
BnaA07g38400D	GSBRNA2T00022869001	BnaA07G0234100ZS	1362	654	8.96167	4.34965	-1.04287	Down	1.64381e-55	2.26049e-54
BnaA07g38470D	GSBRNA2T00022877001	BnaA07G0233400ZS	2	20	0.0149885	0.151503	3.33742	Up	5.95582e-05	0.000168662
BnaCnng32620D	GSBRNA2T00022890001	BnaC09G0389600ZS	872	296	5.03494	1.72757	-1.54323	Down	4.10022e-65	6.41708e-64
BnaC03g74970D	GSBRNA2T00022936001	BnaC03G0554800ZS	10884	5050	65.758	30.8401	-1.09236	Down	0	0
BnaCnng75370D	GSBRNA2T00022944001		2	21	0.0196704	0.20877	3.40781	Up	3.21868e-05	9.37973e-05
BnaAnng39500D	GSBRNA2T00022946001	BnaA03G0535800ZS	10	33	0.0791796	0.264114	1.73796	Up	0.000339688	0.000880976
BnaCnng75390D	GSBRNA2T00022950001	BnaC05G0087700ZS	8	136	0.0872817	1.49981	4.10296	Up	9.4496e-32	8.49213e-31
BnaCnng75440D	GSBRNA2T00022962001	BnaC05G0289600ZS	0	71	0.001	1.53039	10.5797	Up	2.874e-22	2.00963e-21
BnaCnng75510D	GSBRNA2T00023080001	BnaC03G0302200ZS	10	39	0.162613	0.64104	1.97897	Up	2.02324e-05	6.01679e-05
BnaCnng75540D	GSBRNA2T00023098001	BnaC06G0328400ZS	61	15	1.09019	0.270974	-2.00835	Down	7.84614e-08	2.86634e-07
BnaCnng75560D	GSBRNA2T00023208001	BnaC07G0061700ZS	334	161	2.51715	1.22646	-1.03729	Down	1.07038e-14	5.71746e-14
BnaC08g48730D	GSBRNA2T00023263001	BnaC08G0301700ZS	22	56	0.447768	1.15208	1.36342	Up	8.44214e-05	0.00023513
BnaAnng15150D	GSBRNA2T00023338001	BnaC02G0542700ZS	9654	4258	133.996	59.7386	-1.16545	Down	0	0
BnaA06g38730D	GSBRNA2T00023365001	BnaA06G0259100ZS	0	28	0.001	0.151832	7.24634	Up	3.18668e-09	1.27877e-08
BnaAnng39720D	GSBRNA2T00023369001	BnaC04G0280200ZS	48	306	0.785992	5.06481	2.68792	Up	5.9227e-48	7.30234e-47
BnaAnng39730D	GSBRNA2T00023375001	BnaC02G0553400ZS	20	840	0.271571	11.5292	5.40781	Up	2.64004e-221	1.34896e-219
BnaA06g39330D	GSBRNA2T00023382001	BnaA06G0329600ZS	46	270	0.500705	2.97066	2.56875	Up	1.75327e-40	1.89079e-39
BnaUnng04820D	GSBRNA2T00023395001	BnaC04G0339000ZS	39	109	0.434079	1.2263	1.49828	Up	3.4107e-09	1.36598e-08
BnaCnng75770D	GSBRNA2T00023404001	BnaC02G0123300ZS	432	97	5.25728	1.1932	-2.13948	Down	7.03668e-51	9.07086e-50
BnaAnng39750D	GSBRNA2T00023408001	BnaA01G0126000ZS	86	40	0.708445	0.333068	-1.08884	Down	4.7833e-05	0.00013689
BnaA03g57340D	GSBRNA2T00023465001	BnaA03G0301500ZS	12	41	0.13452	0.464574	1.78809	Up	4.41422e-05	0.000126793
BnaA03g57380D	GSBRNA2T00023469001	BnaA03G0301900ZS	35	74	0.451095	0.964043	1.09567	Up	0.000137713	0.000374218
BnaCnng33040D	GSBRNA2T00023481001	BnaC08G0499600ZS	3	1786	0.0309663	18.6343	9.23305	Up	0	0
BnaCnng33060D	GSBRNA2T00023484001	BnaC08G0499900ZS	146	0	1.02999	0.001	-10.0084	Down	2.46354e-44	2.85002e-43
BnaC09g51620D	GSBRNA2T00023510001	BnaC09G0199300ZS	2	182	0.011548	1.06222	6.52329	Up	2.64722e-52	3.48666e-51
BnaAnng39770D	GSBRNA2T00023525001	BnaC01G0384500ZS	0	396	0.001	5.74267	12.4875	Up	7.306e-121	1.95439e-119
BnaAnng39840D	GSBRNA2T00023558001	BnaA06G0436800ZS	53	253	0.611669	2.95139	2.27057	Up	4.26312e-33	3.95477e-32
BnaC09g54600D	GSBRNA2T00023588001	BnaC09G0520800ZS	84	178	0.733849	1.57185	1.09891	Up	2.75878e-09	1.1115e-08
BnaC03g71160D	GSBRNA2T00023608001	BnaC03G0018600ZS	0	196	0.001	4.91768	12.2638	Up	3.44674e-60	5.05855e-59
BnaC03g71260D	GSBRNA2T00023618001	BnaC03G0019300ZS	69	30	1.13184	0.497418	-1.18614	Down	9.78716e-05	0.000270853
BnaC08g47170D	GSBRNA2T00023626001	BnaC08G0111500ZS	197	500	2.05379	5.26895	1.35923	Up	3.88064e-32	3.52372e-31
BnaA03g58470D	GSBRNA2T00023643001		277	26	2.23669	0.212209	-3.39781	Down	7.72294e-54	1.03979e-52
BnaA03g58500D	GSBRNA2T00023646001	BnaA03G0459800ZS	75	29	0.77672	0.303575	-1.35534	Down	6.53158e-06	2.03768e-05
BnaA03g56650D	GSBRNA2T00023690001	BnaA03G0206900ZS	12	43	0.191811	0.694747	1.8568	Up	1.75038e-05	5.23273e-05
BnaAnng39880D	GSBRNA2T00023700001	BnaC03G0700100ZS	2	19	0.0233402	0.224127	3.26342	Up	0.000109811	0.000302205
BnaAnng39920D	GSBRNA2T00023721001	BnaA02G0146900ZS	10	119	0.172795	2.07847	3.58839	Up	2.3549e-25	1.79957e-24
BnaC02g46970D	GSBRNA2T00023735001	BnaC02G0400400.1ZS	144	381	1.23277	3.29694	1.41922	Up	1.8987e-26	1.4936e-25
BnaC05g39970D	GSBRNA2T00023808001	BnaC05G0469600ZS	11	43	0.052338	0.206803	1.98233	Up	7.25766e-06	2.25288e-05
BnaC05g39890D	GSBRNA2T00023820001	BnaC05G0468900ZS	207	599	1.4883	4.35324	1.54842	Up	4.85036e-46	5.78752e-45
BnaC05g39710D	GSBRNA2T00023846001	BnaC05G0467200ZS	186	92	0.940807	0.470371	-1.0001	Down	2.23778e-08	8.49895e-08
BnaC05g39620D	GSBRNA2T00023858001	BnaC02G0274200ZS	0	163	0.001	2.37103	11.2113	Up	3.5365e-50	4.49873e-49
BnaC05g39610D	GSBRNA2T00023859001	BnaC02G0274200ZS	0	170	0.001	6.27353	12.6151	Up	2.66068e-52	3.50313e-51
BnaC05g39590D	GSBRNA2T00023861001	BnaC05G0466200ZS	40	6	0.352074	0.0533814	-2.72147	Down	2.14022e-07	7.55076e-07
BnaA05g17720D	GSBRNA2T00023904001	BnaC05G0316400ZS	0	92	0.001	0.904184	9.82047	Up	1.2239e-28	1.01931e-27
BnaA05g17570D	GSBRNA2T00023932001	BnaA05G0185000ZS	102	1	2.2001	0.0218025	-6.65693	Down	1.78812e-29	1.52206e-28
BnaA05g17520D	GSBRNA2T00023937001	BnaC05G0314600ZS	57	178	0.325513	1.02749	1.65834	Up	3.77688e-16	2.13534e-15
BnaC04g43960D	GSBRNA2T00024049001	BnaC04G0527000ZS	0	61	0.001	0.465805	8.86358	Up	3.1058e-19	1.96842e-18
BnaC04g43710D	GSBRNA2T00024086001	BnaC04G0525100ZS	884	143	7.47241	1.22183	-2.61254	Down	1.86286e-129	5.40738e-128
BnaC04g43420D	GSBRNA2T00024141001	BnaA04G0211600ZS	33	86	0.202771	0.534141	1.39737	Up	6.4455e-07	2.19275e-06
BnaA01g21580D	GSBRNA2T00024209001	BnaA01G0263600ZS	589	26	3.51556	0.156862	-4.48619	Down	7.7445e-139	2.40411e-137
BnaC04g02000D	GSBRNA2T00024252001	BnaC04G0027400ZS	4	27	0.0426975	0.291321	2.77038	Up	1.69328e-05	5.0703e-05
BnaC04g01960D	GSBRNA2T00024258001	BnaC04G0027000ZS	1629	667	4.00643	1.65816	-1.27273	Down	3.89368e-90	8.03536e-89
BnaC04g01740D	GSBRNA2T00024293001	BnaC04G0024800ZS	51	18	1.53372	0.54716	-1.487	Down	7.04978e-05	0.000198088
BnaC04g01680D	GSBRNA2T00024301001	BnaC04G0024200ZS	10	67	0.192665	1.30479	2.75966	Up	7.0895e-12	3.31965e-11
BnaC04g01670D	GSBRNA2T00024302001	BnaC04G0024100ZS	145	312	0.938278	2.04072	1.12099	Up	1.18016e-15	6.53969e-15
BnaC04g01610D	GSBRNA2T00024310001	BnaC04G0022300ZS	2	46	0.0123134	0.286266	4.53906	Up	3.4166e-12	1.62388e-11
BnaC04g01370D	GSBRNA2T00024339001	BnaC04G0019800ZS	102	7	1.47692	0.102452	-3.84957	Down	8.78888e-23	6.24384e-22
BnaC02g29570D	GSBRNA2T00024373001	BnaC02G0379600ZS	110	39	1.28852	0.461773	-1.48046	Down	4.99906e-09	1.98165e-08
BnaC03g17630D	GSBRNA2T00024429001	BnaC03G0178700ZS	6	31	0.0386919	0.202067	2.38473	Up	2.11128e-05	6.26742e-05
BnaC03g17580D	GSBRNA2T00024435001	BnaC03G0178200ZS	5574	20570	1.41224	5.26795	1.89925	Up	0	0
BnaC03g17550D	GSBRNA2T00024439001	BnaC03G0177900ZS	895	1884	2.70367	5.75275	1.08934	Up	1.57126e-82	2.99634e-81
BnaC03g17420D	GSBRNA2T00024455001	BnaC03G0176600ZS	162	39	0.697893	0.169826	-2.03895	Down	6.20664e-19	3.89331e-18
BnaC03g17050D	GSBRNA2T00024501001	BnaC03G0172800ZS	2355	687	6.4799	1.91073	-1.76185	Down	2.4177e-208	1.15412e-206
BnaC03g17010D	GSBRNA2T00024506001	BnaC03G0172400ZS	11	44	0.157094	0.635161	2.0155	Up	4.46326e-06	1.41463e-05
BnaC03g16880D	GSBRNA2T00024520001	BnaC03G0170600ZS	372	140	8.25152	3.13895	-1.39438	Down	6.30174e-25	4.75764e-24
BnaC03g16550D	GSBRNA2T00024563001	BnaC01G0013600ZS	294	128	1.63324	0.718748	-1.18418	Down	7.01142e-16	3.92023e-15
BnaC03g16530D	GSBRNA2T00024568001	BnaC03G0167700ZS	0	106	0.001	1.58068	10.6263	Up	6.92764e-33	6.39581e-32
BnaA06g00850D	GSBRNA2T00024634001	BnaA06G0011600ZS	47	1677	0.329343	11.8781	5.17257	Up	0	0
BnaC03g57440D	GSBRNA2T00024691001	BnaC03G0625900ZS	3134	1449	68.5446	32.0337	-1.09745	Down	5.14672e-136	1.56521e-134
BnaC03g57370D	GSBRNA2T00024703001	BnaC03G0624900ZS	253	100	1.35959	0.54319	-1.32364	Down	3.17764e-16	1.80518e-15
BnaC03g57270D	GSBRNA2T00024744001	BnaC03G0622900ZS	5142	2327	78.4492	35.8854	-1.12836	Down	5.9573e-232	3.18373e-230
BnaC03g57080D	GSBRNA2T00024782001	BnaA09G0542900ZS	81	225	0.767682	2.15548	1.48943	Up	2.39942e-17	1.42421e-16
BnaCnng33330D	GSBRNA2T00024810001	BnaC08G0375000ZS	127	4	1.06871	0.0340237	-4.97319	Down	8.899e-33	8.20034e-32
BnaC04g52990D	GSBRNA2T00024817001	BnaC04G0042400ZS	6	224	0.0965638	3.64398	5.23789	Up	3.61644e-59	5.23324e-58
BnaC04g53020D	GSBRNA2T00024823001	BnaC04G0042900ZS	134245	65242	1952.85	959.321	-1.0255	Down	0	0
BnaAnng15200D	GSBRNA2T00024830001	BnaC01G0504100ZS	28	178	0.515133	3.31014	2.68387	Up	1.73239e-28	1.43611e-27
BnaAnng15210D	GSBRNA2T00024831001	BnaA05G0039900ZS	10	133	0.0604171	0.812225	3.74885	Up	3.80558e-29	3.21545e-28
BnaC03g12430D	GSBRNA2T00024844001	BnaC03G0123700ZS	1222	2754	6.55561	14.9338	1.18778	Up	2.44548e-137	7.52455e-136
BnaC03g12460D	GSBRNA2T00024849001	BnaC03G0124000ZS	2442	5426	15.0445	33.7891	1.16732	Up	2.4418e-261	1.47479e-259
BnaC03g12500D	GSBRNA2T00024854001	BnaA03G0107800ZS	194	583	1.22742	3.72841	1.60294	Up	4.36268e-47	5.29173e-46
BnaC03g12530D	GSBRNA2T00024857001	BnaC03G0124600.1ZS	94	834	0.275189	2.46794	3.16481	Up	6.34864e-151	2.14616e-149
BnaC03g12540D	GSBRNA2T00024858001	BnaC03G0124800ZS	389	1600	4.18087	17.3821	2.05573	Up	7.60294e-177	3.04795e-175
BnaC08g48410D	GSBRNA2T00024867001	BnaC08G0267800ZS	58	140	0.916164	2.23531	1.2868	Up	2.33284e-09	9.44771e-09
BnaA07g36910D	GSBRNA2T00024879001	BnaA07G0105900ZS	13	766	0.0978942	5.83052	5.89626	Up	3.1677e-209	1.51907e-207
BnaA07g36920D	GSBRNA2T00024881001	BnaA07G0105700ZS	5	91	0.021984	0.40443	4.20136	Up	5.37342e-22	3.72996e-21
BnaC09g52420D	GSBRNA2T00024901001	BnaC07G0359500ZS	63	132	0.646734	1.3697	1.08261	Up	4.32192e-07	1.49121e-06
BnaCnng76020D	GSBRNA2T00024929001	BnaC05G0138500ZS	3	24	0.0227737	0.184157	3.0155	Up	2.43418e-05	7.18437e-05
BnaC05g52260D	GSBRNA2T00024933001	BnaC05G0542800ZS	278	106	3.07234	1.18412	-1.37552	Down	1.1672e-18	7.25156e-18
BnaCnng76030D	GSBRNA2T00024938001	BnaC04G0335500ZS	0	14	0.001	0.169575	7.40578	Up	5.6299e-05	0.000159963
BnaCnng76090D	GSBRNA2T00024964001	BnaC09G0427000ZS	0	39	0.001	0.790342	9.62633	Up	1.46651e-12	7.10089e-12
BnaA01g32290D	GSBRNA2T00024981001	BnaA01G0423300ZS	1941	416	10.4486	2.26356	-2.20665	Down	3.9034e-231	2.0785e-229
BnaA01g32250D	GSBRNA2T00024985001	BnaA01G0422900ZS	176	66	0.731018	0.277092	-1.39954	Down	1.22891e-12	5.97331e-12
BnaC07g49790D	GSBRNA2T00025013001	BnaC07G0377400ZS	76	325	0.884729	3.82423	2.11186	Up	1.47172e-38	1.53327e-37
BnaC07g50630D	GSBRNA2T00025041001	BnaC07G0481300ZS	182	61	2.05248	0.695349	-1.56156	Down	4.64724e-15	2.51699e-14
BnaAnng39990D	GSBRNA2T00025070001	BnaA06G0083900ZS	66	493	0.604159	4.56162	2.91655	Up	4.96392e-83	9.54299e-82
BnaCnng33690D	GSBRNA2T00025111001	BnaA01G0302700ZS	11114	4804	57.9334	25.312	-1.19457	Down	0	0
BnaCnng33700D	GSBRNA2T00025112001	BnaC01G0373800ZS	1359	480	4.95	1.76722	-1.48594	Down	4.1669e-95	9.01533e-94
BnaCnng33710D	GSBRNA2T00025113001	BnaC01G0373900ZS	575	198	2.07584	0.722529	-1.52257	Down	1.05624e-42	1.18493e-41
BnaA04g27440D	GSBRNA2T00025119001	BnaA04G0007400ZS	1796	392	10.0068	2.2077	-2.18037	Down	7.44082e-211	3.59883e-209
BnaA04g27460D	GSBRNA2T00025121001	BnaA04G0007600ZS	1198	3285	11.9835	33.2146	1.47076	Up	1.64186e-226	8.59899e-225
BnaCnng33770D	GSBRNA2T00025130001	BnaC08G0018100ZS	19	478	0.5079	12.9157	4.66844	Up	2.191e-117	5.67069e-116
BnaCnng33800D	GSBRNA2T00025134001	BnaC06G0459400ZS	1617	774	5.91499	2.86187	-1.04742	Down	5.0371e-66	7.977e-65
BnaC08g46750D	GSBRNA2T00025154001	BnaC08G0067800ZS	100	204	0.924412	1.90616	1.04407	Up	1.01812e-09	4.22215e-09
BnaAnng15470D	GSBRNA2T00025176001	BnaA08G0301400ZS	47	100	0.37756	0.811995	1.10476	Up	7.91026e-06	2.44583e-05
BnaAnng40070D	GSBRNA2T00025227001	BnaA04G0285400ZS	182	476	3.07688	8.13411	1.40252	Up	4.30788e-32	3.90731e-31
BnaCnng76220D	GSBRNA2T00025229001	BnaA07G0084800.1ZS	407	116	2.07995	0.599213	-1.79541	Down	2.04572e-38	2.12673e-37
BnaA03g55540D	GSBRNA2T00025282001	BnaA03G0026300ZS	30	200	0.428437	2.88709	2.75246	Up	1.1508e-32	1.05806e-31
BnaA03g55600D	GSBRNA2T00025289001		0	479	0.001	3.05096	11.575	Up	4.83152e-146	1.57031e-144
BnaA03g55610D	GSBRNA2T00025291001	BnaC09G0579200ZS	28186	13230	31.5137	14.9517	-1.07567	Down	0	0
BnaA03g55630D	GSBRNA2T00025293001	BnaC09G0579200ZS	0	114	0.001	1.08881	10.0885	Up	2.592e-35	2.52261e-34
BnaA03g55640D	GSBRNA2T00025294001	BnaC09G0579200ZS	12	119	0.10942	1.0968	3.32535	Up	7.935e-24	5.80657e-23
BnaC04g55070D	GSBRNA2T00025309001	BnaC04G0276700ZS	0	27	0.001	0.762115	9.57387	Up	6.40778e-09	2.5237e-08
BnaAnng15610D	GSBRNA2T00025344001	BnaA05G0137300ZS	669	183	5.33765	1.47584	-1.85467	Down	8.22946e-65	1.28303e-63
BnaCnng33970D	GSBRNA2T00025351001	BnaC04G0412900ZS	700	102	4.58335	0.675072	-2.76329	Down	2.64018e-109	6.39531e-108
BnaCnng76260D	GSBRNA2T00025382001	BnaA02G0157900ZS	25	66	0.285364	0.761497	1.41603	Up	1.0949e-05	3.34368e-05
BnaC09g38030D	GSBRNA2T00025416001	BnaC09G0466900ZS	102	47	0.676356	0.31502	-1.10234	Down	7.60776e-06	2.35687e-05
BnaC08g49490D	GSBRNA2T00025438001	BnaA09G0612200ZS	1	32	0.013618	0.440481	5.0155	Up	3.42844e-09	1.37263e-08
BnaC08g49510D	GSBRNA2T00025440001	BnaC08G0466900ZS	210	76	1.24314	0.454758	-1.45082	Down	1.53099e-15	8.44545e-15
BnaC08g49570D	GSBRNA2T00025447001	BnaC08G0467200ZS	336	50	5.10132	0.767322	-2.73297	Down	1.01046e-52	1.33616e-51
BnaAnng15670D	GSBRNA2T00025474001	BnaC04G0083300ZS	44	11	0.365024	0.0922415	-1.9845	Down	6.47078e-06	2.01974e-05
BnaAnng15720D	GSBRNA2T00025484001	BnaA04G0224900ZS	15	1	0.488686	0.0329309	-3.89139	Down	0.000297806	0.000776862
BnaAnng40240D	GSBRNA2T00025549001	BnaA06G0145300ZS	119	412	0.659121	2.30664	1.80718	Up	1.08124e-39	1.14982e-38
BnaCnng34330D	GSBRNA2T00025572001	BnaC06G0094600ZS	627	249	4.01023	1.60978	-1.31682	Down	1.29005e-37	1.3211e-36
BnaA01g34980D	GSBRNA2T00025603001	BnaA01G0105700ZS	152	489	1.02603	3.33649	1.70126	Up	3.75908e-43	4.26998e-42
BnaC06g42550D	GSBRNA2T00025627001	BnaC06G0186200ZS	1969	6524	21.2842	71.2837	1.74379	Up	0	0
BnaC06g42590D	GSBRNA2T00025632001	BnaC06G0186600ZS	325	702	1.69317	3.69675	1.12653	Up	1.59342e-33	1.4908e-32
BnaC06g42600D	GSBRNA2T00025633001	BnaC06G0186700ZS	279	63	2.54649	0.581224	-2.13135	Down	2.82168e-33	2.62723e-32
BnaCnng76420D	GSBRNA2T00025658001	BnaC04G0483000ZS	56	13	0.445284	0.104486	-2.09142	Down	1.30579e-07	4.686e-07
BnaCnng34440D	GSBRNA2T00025714001	BnaC02G0174200ZS	16	129	0.380062	3.09734	3.02672	Up	1.19657e-23	8.71265e-23
BnaCnng34530D	GSBRNA2T00025746001	BnaC03G0663700ZS	8	602	0.0378338	2.87774	6.24912	Up	4.453e-168	1.69e-166
BnaC03g75530D	GSBRNA2T00025783001	BnaC03G0626700ZS	1469	28	10.6107	0.20443	-5.69777	Down	0	0
BnaUnng04920D	GSBRNA2T00025791001	BnaC04G0573400ZS	128	37	2.35489	0.688062	-1.77505	Down	6.4198e-13	3.16599e-12
BnaUnng04930D	GSBRNA2T00025792001	BnaC04G0566000.3ZS	88	36	2.12805	0.879968	-1.27401	Down	3.15988e-06	1.01535e-05
BnaCnng34560D	GSBRNA2T00025839001	BnaC02G0112700ZS	19	90	0.137875	0.660146	2.25942	Up	1.26327e-12	6.13868e-12
BnaA06g39970D	GSBRNA2T00025851001	BnaA06G0416100ZS	418	174	3.06886	1.29126	-1.24892	Down	1.01352e-23	7.39449e-23
BnaAnng15980D	GSBRNA2T00025873001	BnaA02G0071400ZS	1947	867	14.7802	6.65268	-1.15165	Down	5.9676e-92	1.25161e-90
BnaC05g51020D	GSBRNA2T00025886001	BnaC05G0232500ZS	34	0	1.18154	0.001	-10.2064	Down	7.02092e-11	3.11695e-10
BnaCnng76650D	GSBRNA2T00025953001	BnaC03G0758400ZS	127	59	1.35104	0.634424	-1.09055	Down	7.2241e-07	2.44877e-06
BnaC09g52660D	GSBRNA2T00026024001	BnaC03G0010600ZS	107	48	5.48611	2.48763	-1.14101	Down	2.42634e-06	7.87371e-06
BnaA09g56980D	GSBRNA2T00026073001	BnaA10G0177400ZS	96	12	0.819606	0.103557	-2.9845	Down	1.73373e-17	1.03511e-16
BnaC03g76510D	GSBRNA2T00026085001	BnaC03G0680400ZS	54	0	0.334436	0.001	-8.38558	Down	7.45276e-17	4.34525e-16
BnaCnng76790D	GSBRNA2T00026111001	BnaC03G0518900ZS	75	3	0.960039	0.0388162	-4.62836	Down	4.02436e-19	2.54181e-18
BnaCnng76860D	GSBRNA2T00026137001	BnaC03G0321500.1ZS	367	146	4.33142	1.74173	-1.31432	Down	1.27273e-22	8.99562e-22
BnaCnng34930D	GSBRNA2T00026149001	BnaC06G0274000ZS	33	0	0.537555	0.001	-9.07027	Down	1.39668e-10	6.09723e-10
BnaC03g72100D	GSBRNA2T00026181001	BnaC03G0212400ZS	1021	296	7.1598	2.09813	-1.77082	Down	4.8551e-92	1.01886e-90
BnaC05g50010D	GSBRNA2T00026189001	BnaC05G0149600ZS	5	36	0.0845295	0.615185	2.86349	Up	3.72574e-07	1.29195e-06
BnaCnng35090D	GSBRNA2T00026203001	BnaC09G0454300ZS	5	25	0.0590855	0.298618	2.33742	Up	0.000171248	0.000460026
BnaCnng35100D	GSBRNA2T00026204001	BnaC09G0454400ZS	64	400	0.455959	2.88052	2.65935	Up	1.76167e-61	2.62703e-60
BnaA02g36580D	GSBRNA2T00026206001	BnaA02G0293000ZS	105	259	1.7499	4.36302	1.31806	Up	1.15287e-16	6.66185e-16
BnaC01g37630D	GSBRNA2T00026268001		829	0	20.5776	0.001	-14.3288	Down	2.38128e-248	1.36302e-246
BnaC01g37700D	GSBRNA2T00026283001	BnaC01G0450200ZS	82	29	1.6546	0.591482	-1.48408	Down	4.41442e-07	1.52176e-06
BnaC01g37710D	GSBRNA2T00026284001	BnaC01G0450300ZS	234	68	1.34532	0.395171	-1.76741	Down	2.68874e-22	1.88225e-21
BnaC01g37720D	GSBRNA2T00026286001	BnaC01G0450400ZS	3719	1388	15.4264	5.8196	-1.40641	Down	1.09669e-236	5.98308e-235
BnaC01g37770D	GSBRNA2T00026296001	BnaC01G0451000ZS	150	73	4.34388	2.13685	-1.0235	Down	3.11912e-07	1.08673e-06
BnaC01g37800D	GSBRNA2T00026300001	BnaC07G0227700ZS	92	341	0.204553	0.766369	1.90556	Up	1.72513e-35	1.68588e-34
BnaC01g37830D	GSBRNA2T00026303001	BnaC01G0451600ZS	24	2	0.101619	0.00855966	-3.56947	Down	6.39284e-06	1.99711e-05
BnaC01g37880D	GSBRNA2T00026311001	BnaC01G0452100ZS	2783	1235	7.95136	3.56665	-1.15663	Down	1.67602e-131	4.94333e-130
BnaC01g38080D	GSBRNA2T00026332001	BnaC01G0453100ZS	79	24	0.611584	0.187804	-1.70332	Down	4.36402e-08	1.62378e-07
BnaC01g38160D	GSBRNA2T00026350001	BnaC01G0453800ZS	1146	417	9.43216	3.46918	-1.44299	Down	4.06984e-77	7.35369e-76
BnaC01g38170D	GSBRNA2T00026352001	BnaC01G0453900ZS	2962	1407	19.6686	9.44383	-1.05845	Down	2.03956e-121	5.48192e-120
BnaA07g02530D	GSBRNA2T00026529001	BnaA09G0148700ZS	56	130	0.462125	1.08437	1.23051	Up	2.7544e-08	1.03927e-07
BnaA07g02560D	GSBRNA2T00026533001	BnaA01G0202000ZS	5	110	0.0923502	2.05364	4.47493	Up	2.28138e-27	1.84166e-26
BnaA07g02590D	GSBRNA2T00026537001	BnaA07G0028800ZS	56	168	0.618888	1.87671	1.60046	Up	1.23376e-14	6.57339e-14
BnaA07g02610D	GSBRNA2T00026540001	BnaA07G0028500ZS	117	43	1.20239	0.446677	-1.4286	Down	4.27324e-09	1.70083e-08
BnaA07g02620D	GSBRNA2T00026541001	BnaA07G0028400ZS	694	235	7.61596	2.60674	-1.54678	Down	2.38818e-52	3.14774e-51
BnaA07g02650D	GSBRNA2T00026545001	BnaA07G0028100ZS	32	4	0.163802	0.0206963	-2.9845	Down	1.26816e-06	4.21206e-06
BnaA07g02700D	GSBRNA2T00026551001	BnaA07G0027700ZS	270	107	1.50436	0.602612	-1.31985	Down	3.80944e-17	2.24497e-16
BnaA07g02760D	GSBRNA2T00026560001	BnaA07G0027200ZS	578	281	2.96514	1.4571	-1.025	Down	7.05744e-24	5.17007e-23
BnaA07g02840D	GSBRNA2T00026571001	BnaC07G0050800ZS	9	73	0.106488	0.873064	3.0354	Up	5.42204e-14	2.81001e-13
BnaCnng04590D	GSBRNA2T00026627001	BnaC03G0630100.2ZS	2214	909	8.66283	3.5951	-1.26881	Down	3.0074e-121	8.07143e-120
BnaCnng04640D	GSBRNA2T00026633001	BnaC03G0630600ZS	299	7	2.25882	0.0534531	-5.40115	Down	1.79556e-78	3.28728e-77
BnaCnng04650D	GSBRNA2T00026634001	BnaA08G0226800ZS	39	0	1.48751	0.001	-10.5387	Down	2.25358e-12	1.08205e-11
BnaCnng04720D	GSBRNA2T00026642001	BnaC03G0631200ZS	0	97	0.001	0.768553	9.586	Up	3.72308e-30	3.22566e-29
BnaCnng04910D	GSBRNA2T00026673001	BnaC03G0634600ZS	121	292	4.40045	10.7339	1.28646	Up	5.738e-18	3.48313e-17
BnaC05g34800D	GSBRNA2T00026749001	BnaC05G0416800ZS	11	44	0.184965	0.74785	2.0155	Up	4.46326e-06	1.41457e-05
BnaA01g21960D	GSBRNA2T00026786001	BnaA01G0268300ZS	326	124	1.12497	0.432523	-1.37904	Down	1.07243e-21	7.37725e-21
BnaA01g21990D	GSBRNA2T00026791001	BnaA01G0268500ZS	341	167	2.81401	1.393	-1.01443	Down	1.7256e-14	9.13414e-14
BnaA01g22100D	GSBRNA2T00026805001	BnaC01G0330000ZS	15	1	0.156033	0.0105145	-3.89139	Down	0.000297806	0.000776751
BnaA01g22130D	GSBRNA2T00026812001	BnaA01G0269900ZS	3476	1162	53.4665	18.0664	-1.56532	Down	3.21682e-259	1.91606e-257
BnaA01g22170D	GSBRNA2T00026820001	BnaA01G0270400ZS	5	147	0.0194987	0.579453	4.89324	Up	5.48428e-38	5.65893e-37
BnaA01g22280D	GSBRNA2T00026833001	BnaC01G0330000ZS	18	2	0.172161	0.0193356	-3.15443	Down	0.00024259	0.000639905
BnaA01g22300D	GSBRNA2T00026835001	BnaA01G0271600ZS	36	5	0.355184	0.0498638	-2.8325	Down	5.2699e-07	1.8058e-06
BnaA01g22520D	GSBRNA2T00026865001	BnaA01G0273700ZS	2	48	0.0579184	1.40505	4.60046	Up	9.14628e-13	4.47267e-12
BnaA01g22570D	GSBRNA2T00026874001	BnaA01G0274200ZS	262	94	2.8354	1.02826	-1.46334	Down	3.003e-19	1.90475e-18
BnaA01g22580D	GSBRNA2T00026875001	BnaA01G0274200ZS	378	117	5.3414	1.67114	-1.67638	Down	1.15051e-32	1.05792e-31
BnaC05g32390D	GSBRNA2T00026878001	BnaC05G0391400ZS	159	664	0.971264	4.0999	2.07765	Up	1.80166e-75	3.20794e-74
BnaC05g32640D	GSBRNA2T00026913001	BnaC01G0069200ZS	1	33	0.006409	0.213781	5.05989	Up	1.75374e-09	7.1558e-09
BnaC05g32660D	GSBRNA2T00026918001	BnaC03G0320800ZS	2	167	0.0292298	2.46705	6.3992	Up	7.94476e-48	9.77569e-47
BnaA05g30290D	GSBRNA2T00027001001	BnaA05G0459100ZS	1133	450	7.28129	2.92318	-1.31665	Down	1.44177e-66	2.29665e-65
BnaA05g30880D	GSBRNA2T00027071001	BnaA05G0465400ZS	26	89	0.171556	0.59359	1.79079	Up	1.33588e-09	5.49112e-09
BnaA05g30920D	GSBRNA2T00027077001	BnaA05G0466100ZS	179	77	2.53704	1.10314	-1.20153	Down	1.96437e-10	8.48954e-10
BnaA05g30980D	GSBRNA2T00027084001	BnaA05G0466800ZS	17	46	0.0929529	0.254236	1.4516	Up	0.000191937	0.000512953
BnaA05g30990D	GSBRNA2T00027085001	BnaC05G0526900ZS	475	1362	2.20853	6.40106	1.53522	Up	3.59306e-101	8.17672e-100
BnaC04g13440D	GSBRNA2T00027139001	BnaC04G0167400ZS	0	19	0.001	0.197585	7.62633	Up	1.7126e-06	5.62907e-06
BnaC04g13590D	GSBRNA2T00027170001		0	94	0.001	3.76163	11.8771	Up	3.02698e-29	2.56468e-28
BnaA08g15200D	GSBRNA2T00027241001	BnaA08G0182200ZS	6	31	0.0325414	0.169946	2.38473	Up	2.11128e-05	6.26768e-05
BnaA08g14980D	GSBRNA2T00027275001	BnaA08G0179800ZS	19	307	0.0258854	0.42277	4.02966	Up	4.73224e-69	7.77115e-68
BnaA08g14890D	GSBRNA2T00027291001	BnaC01G0498500ZS	6	86	0.0264056	0.382567	3.8568	Up	1.06603e-19	6.86739e-19
BnaA08g14880D	GSBRNA2T00027293001	BnaA08G0177300ZS	2	25	0.0212761	0.268824	3.65935	Up	2.6625e-06	8.60921e-06
BnaA08g14630D	GSBRNA2T00027328001	BnaA08G0174400ZS	351	150	2.06999	0.894164	-1.21101	Down	2.75232e-19	1.74741e-18
BnaAnng16070D	GSBRNA2T00027392001	BnaA02G0226700ZS	134	58	0.967148	0.423137	-1.19261	Down	4.5155e-08	1.67776e-07
BnaCnng35300D	GSBRNA2T00027467001	BnaA09G0488400ZS	120	271	0.854274	1.95007	1.19075	Up	4.88844e-15	2.64547e-14
BnaC03g74610D	GSBRNA2T00027479001	BnaC04G0326900ZS	25	103	0.210188	0.875325	2.05814	Up	7.78252e-13	3.8203e-12
BnaA03g59170D	GSBRNA2T00027623001	BnaA03G0554200ZS	17	195	0.0885659	1.02687	3.53536	Up	3.53156e-40	3.79017e-39
BnaCnng35460D	GSBRNA2T00027645001	BnaC08G0277100ZS	15	1	0.13481	0.00908439	-3.89139	Down	0.000297806	0.000776806
BnaC08g49300D	GSBRNA2T00027659001	BnaA09G0597300ZS	93	24	1.22901	0.320589	-1.9387	Down	8.11252e-11	3.58896e-10
BnaC08g49310D	GSBRNA2T00027660001	BnaC08G0450700ZS	15	47	0.102806	0.325605	1.66319	Up	3.13354e-05	9.13997e-05
BnaC08g49350D	GSBRNA2T00027664001	Bnascaffold0026G0072200ZS	41	3	0.778733	0.0575958	-3.75709	Down	1.06729e-09	4.41928e-09
BnaCnng35530D	GSBRNA2T00027676001	BnaC07G0116000ZS	166	6	0.809112	0.0295608	-4.77458	Down	1.39965e-41	1.53932e-40
BnaAnng40730D	GSBRNA2T00027712001		8	39	0.180005	0.887002	2.3009	Up	2.7748e-06	8.95654e-06
BnaAnng16300D	GSBRNA2T00027741001	Bnascaffold0469G0000100ZS	51	17	0.417558	0.140689	-1.56947	Down	3.5494e-05	0.000102977
BnaA09g51630D	GSBRNA2T00027754001	BnaA09G0019900ZS	136	19	1.58714	0.224127	-2.82404	Down	5.85082e-23	4.17884e-22
BnaC03g75590D	GSBRNA2T00027777001	BnaC03G0626700ZS	128	1	4.65502	0.0367601	-6.9845	Down	3.82092e-37	3.87498e-36
BnaC01g42930D	GSBRNA2T00027785001	BnaC01G0207900ZS	29	2	0.459629	0.0320409	-3.84248	Down	2.86374e-07	1.00051e-06
BnaAnng40740D	GSBRNA2T00027816001	BnaA01G0044400.1ZS	198	538	1.52653	4.19264	1.4576	Up	4.11626e-38	4.25633e-37
BnaCnng77190D	GSBRNA2T00027826001	BnaC06G0048100ZS	88	36	1.01936	0.421516	-1.27401	Down	3.15988e-06	1.01539e-05
BnaC09g51780D	GSBRNA2T00027894001	BnaC07G0225100ZS	0	83	0.001	0.880515	9.7822	Up	6.57756e-26	5.0987e-25
BnaC06g43870D	GSBRNA2T00027906001	BnaC06G0395700ZS	55	139	0.287175	0.733606	1.35308	Up	6.15524e-10	2.58681e-09
BnaA03g58830D	GSBRNA2T00027923001	BnaA03G0508600ZS	192	454	5.56017	13.2895	1.25708	Up	3.55712e-26	2.77614e-25
BnaAnng40800D	GSBRNA2T00027968001	BnaA03G0488700ZS	60	26	1.35004	0.591335	-1.19095	Down	0.0002715	0.000712014
BnaAnng16400D	GSBRNA2T00028037001	BnaC03G0122700ZS	1	151	0.0163748	2.4993	7.2539	Up	1.19614e-44	1.39303e-43
BnaAnng16430D	GSBRNA2T00028040001	BnaC07G0491000ZS	0	34	0.001	0.711831	9.47539	Up	4.8209e-11	2.16118e-10
BnaAnng16440D	GSBRNA2T00028041001	BnaA02G0065700ZS	0	15	0.001	0.803737	9.65058	Up	2.79984e-05	8.21631e-05
BnaA09g52420D	GSBRNA2T00028070001	BnaA09G0086400ZS	0	12	0.001	0.19862	7.63387	Up	0.000227634	0.000602992
BnaA05g36440D	GSBRNA2T00028139001	BnaA05G0182700ZS	559	101	3.23764	0.591293	-2.453	Down	6.90894e-77	1.24468e-75
BnaC02g45000D	GSBRNA2T00028146001	BnaC02G0186700ZS	7	54	0.0681322	0.531267	2.96303	Up	1.87347e-10	8.11344e-10
BnaCnng35740D	GSBRNA2T00028222001	BnaC01G0222200ZS	12	41	0.206593	0.713483	1.78809	Up	4.41422e-05	0.000126783
BnaA07g39050D	GSBRNA2T00028232001	BnaA07G0340900ZS	118	576	0.687682	3.39307	2.30278	Up	1.62908e-74	2.87068e-73
BnaC02g48180D	GSBRNA2T00028262001	BnaC02G0466500ZS	34	89	0.412163	1.09055	1.40377	Up	3.73772e-07	1.2958e-06
BnaUnng05080D	GSBRNA2T00028309001		110	38	1.03938	0.362936	-1.51794	Down	2.57902e-09	1.04085e-08
BnaA03g55720D	GSBRNA2T00028360001	BnaA03G0032900ZS	728	331	8.17065	3.75507	-1.12161	Down	4.4745e-34	4.23443e-33
BnaA03g55730D	GSBRNA2T00028361001	BnaA03G0033000ZS	523	214	3.54566	1.46647	-1.2737	Down	3.85394e-30	3.33746e-29
BnaA03g55780D	GSBRNA2T00028367001	BnaA03G0033500ZS	1484	255	10.9037	1.89385	-2.52543	Down	5.69486e-208	2.71146e-206
BnaA03g55810D	GSBRNA2T00028370001	BnaC01G0362100ZS	174	1099	1.42461	9.09514	2.67453	Up	6.38896e-167	2.40112e-165
BnaC05g49290D	GSBRNA2T00028397001	BnaA06G0080700ZS	294	2224	1.46887	11.2314	2.93476	Up	0	0
BnaCnng36030D	GSBRNA2T00028511001	Bnascaffold0026G0044200ZS	6	495	0.0288257	2.4038	6.38182	Up	2.3825e-139	7.42738e-138
BnaCnng36040D	GSBRNA2T00028512001	Bnascaffold0385G0000300ZS	0	207	0.001	0.903456	9.81931	Up	1.58618e-63	2.4311e-62
BnaCnng36050D	GSBRNA2T00028513001	Bnascaffold0026G0043700ZS	21	1135	0.110883	6.05766	5.77166	Up	8e-307	5.88349e-305
BnaA03g59800D	GSBRNA2T00028621001	BnaA03G0586600ZS	3156	9069	19.3669	56.2533	1.53834	Up	0	0
BnaA03g59950D	GSBRNA2T00028661001	BnaA03G0588100ZS	103	238	0.510796	1.19303	1.22381	Up	6.54358e-14	3.37741e-13
BnaC03g22570D	GSBRNA2T00028704001	BnaA08G0096300ZS	227	685	4.79705	14.632	1.60891	Up	2.59472e-55	3.55945e-54
BnaC03g22410D	GSBRNA2T00028725001	BnaC03G0229400ZS	16	0	0.285951	0.001	-8.15963	Down	1.67134e-05	5.00828e-05
BnaC03g22170D	GSBRNA2T00028752001	BnaC03G0226800ZS	2077	4905	14.1731	33.8324	1.25525	Up	5.51428e-265	3.39768e-263
BnaC03g22090D	GSBRNA2T00028760001	BnaC03G0226000ZS	7	58	0.0463838	0.388473	3.06612	Up	1.79858e-11	8.23926e-11
BnaC03g21970D	GSBRNA2T00028776001	BnaC06G0302300ZS	3	20	0.0415167	0.279767	2.75246	Up	0.000251158	0.000661482
BnaC02g40010D	GSBRNA2T00028825001	BnaC02G0501200ZS	2	19	0.00953534	0.091564	3.26342	Up	0.000109811	0.000302228
BnaC02g39830D	GSBRNA2T00028852001	BnaC02G0499200ZS	33	9	0.219597	0.0605368	-1.85897	Down	0.000195138	0.000521149
BnaC02g39680D	GSBRNA2T00028871001	BnaA02G0092800ZS	6	834	0.0281062	3.94895	7.13444	Up	7.63422e-241	4.23422e-239
BnaC06g18000D	GSBRNA2T00028896001	BnaC06G0231900ZS	97	313	0.483597	1.57732	1.7056	Up	2.67608e-28	2.21016e-27
BnaC06g18010D	GSBRNA2T00028898001	BnaC06G0232000ZS	21	1361	0.13925	9.12216	6.03363	Up	0	0
BnaC06g18020D	GSBRNA2T00028899001	BnaC02G0043400ZS	1501	14	30.2872	0.285543	-6.72886	Down	0	0
BnaC06g18050D	GSBRNA2T00028902001	BnaC06G0182300ZS	1	579	0.0207125	12.1221	9.19292	Up	6.50774e-174	2.57233e-172
BnaC06g18100D	GSBRNA2T00028909001	BnaC06G0232100ZS	0	61	0.001	0.288976	8.17481	Up	3.1058e-19	1.96859e-18
BnaC06g18110D	GSBRNA2T00028910001	BnaA07G0217300ZS	7	797	0.0561843	6.46606	6.84658	Up	5.65568e-228	2.97483e-226
BnaC07g03530D	GSBRNA2T00029067001	BnaC07G0041800ZS	0	184	0.001	2.39379	11.2251	Up	1.50602e-56	2.10697e-55
BnaC07g03450D	GSBRNA2T00029080001	BnaC07G0041100ZS	14	47	0.0819457	0.278074	1.76273	Up	1.44503e-05	4.3579e-05
BnaC06g04110D	GSBRNA2T00029134001	BnaA06G0027400ZS	830	154	9.23809	1.73256	-2.41468	Down	2.89062e-111	7.12913e-110
BnaC06g04140D	GSBRNA2T00029138001	BnaA06G0027100ZS	802	362	3.17242	1.44741	-1.13212	Down	6.57252e-38	6.77325e-37
BnaC06g04160D	GSBRNA2T00029141001	BnaC06G0052200ZS	17	72	0.0973793	0.416884	2.09796	Up	1.43599e-09	5.89372e-09
BnaC06g04420D	GSBRNA2T00029184001	BnaC06G0054900ZS	68	1	1.28118	0.0190444	-6.07197	Down	1.73148e-19	1.10725e-18
BnaC02g30120D	GSBRNA2T00029240001		0	85	0.001	2.05127	11.0023	Up	1.62677e-26	1.28244e-25
BnaA02g22050D	GSBRNA2T00029288001	BnaA02G0271100ZS	12	0	0.341192	0.001	-8.41444	Down	0.000261746	0.000687762
BnaA02g21930D	GSBRNA2T00029310001	BnaA02G0269600ZS	406	899	2.08735	4.67189	1.16234	Up	1.47971e-44	1.71863e-43
BnaA02g21890D	GSBRNA2T00029319001	BnaA02G0269100ZS	4662	11606	42.5511	107.074	1.33135	Up	0	0
BnaA02g21850D	GSBRNA2T00029327001	BnaC02G0365500ZS	155	817	1.15332	6.14474	2.41356	Up	6.02008e-111	1.48174e-109
BnaA02g21830D	GSBRNA2T00029329001	BnaA02G0268500ZS	1309	3790	10.9956	32.1797	1.54923	Up	9.85364e-282	6.47981e-280
BnaA02g21750D	GSBRNA2T00029347001	BnaA02G0267400ZS	67029	25601	473.94	182.971	-1.37309	Down	0	0
BnaA02g21730D	GSBRNA2T00029353001	BnaA02G0267300ZS	172	34	1.20526	0.240821	-2.32331	Down	2.70412e-23	1.94807e-22
BnaA02g21680D	GSBRNA2T00029360001	BnaA02G0266400ZS	10005	4442	95.8884	43.0321	-1.15594	Down	0	0
BnaC01g29710D	GSBRNA2T00029379001	BnaC09G0087200ZS	0	23	0.001	0.246479	7.94532	Up	1.04757e-07	3.79257e-07
BnaC01g29770D	GSBRNA2T00029389001	BnaC01G0345400ZS	0	237	0.001	1.45862	10.5104	Up	1.25688e-72	2.16639e-71
BnaC01g29810D	GSBRNA2T00029393001	BnaC01G0345800ZS	61	7	0.914296	0.106052	-3.10789	Down	5.51432e-12	2.59666e-11
BnaC01g29850D	GSBRNA2T00029401001	BnaC05G0219700ZS	18	46	0.712616	1.8408	1.36913	Up	0.00035887	0.000928622
BnaC01g29860D	GSBRNA2T00029402001	BnaC01G0346100ZS	509	1120	5.25394	11.6856	1.15326	Up	2.04036e-54	2.76739e-53
BnaC01g29930D	GSBRNA2T00029422001	BnaC01G0346700ZS	6507	14406	34.9878	78.2968	1.1621	Up	0	0
BnaC01g30100D	GSBRNA2T00029449001	BnaC01G0348400ZS	18	50	0.115678	0.324798	1.48943	Up	7.29992e-05	0.000204779
BnaA05g19380D	GSBRNA2T00029461001	Bnascaffold2618G0000100ZS	0	978	0.001	7.894	12.9465	Up	2.0097e-297	1.41147e-295
BnaA05g19050D	GSBRNA2T00029507001	BnaA08G0213000ZS	3408	1057	33.7661	10.5857	-1.67345	Down	1.08084e-279	7.03824e-278
BnaA05g18780D	GSBRNA2T00029538001	BnaA05G0354900ZS	147	440	0.832892	2.51993	1.59718	Up	9.09098e-36	8.93297e-35
BnaA05g18710D	GSBRNA2T00029547001	BnaA05G0354200ZS	359	153	4.28007	1.8438	-1.21496	Down	8.74312e-20	5.64921e-19
BnaA05g18690D	GSBRNA2T00029549001	BnaA05G0354000ZS	32	8	0.208361	0.0526529	-1.9845	Down	0.000128656	0.000351051
BnaCnng36210D	GSBRNA2T00029563001	BnaC05G0239200ZS	255	604	2.142	5.12838	1.25955	Up	2.18216e-34	2.08039e-33
BnaAnng16720D	GSBRNA2T00029571001	BnaC09G0283100ZS	93	1	0.288844	0.00313939	-6.52366	Down	7.97658e-27	6.35103e-26
BnaCnng36270D	GSBRNA2T00029590001		5	455	0.177704	16.3457	6.52329	Up	5.08158e-129	1.46576e-127
BnaCnng36280D	GSBRNA2T00029591001		3	596	0.0542357	10.8912	7.6497	Up	7.0815e-175	2.81429e-173
BnaAnng16750D	GSBRNA2T00029620001	BnaC03G0557100ZS	0	12	0.001	0.122772	6.93983	Up	0.000227634	0.000603166
BnaC04g55920D	GSBRNA2T00029702001	BnaC04G0367200ZS	548	249	6.37145	2.92632	-1.12253	Down	4.37578e-26	3.40745e-25
BnaC04g54240D	GSBRNA2T00029718001	BnaC04G0151900ZS	12	41	0.0691181	0.238704	1.78809	Up	4.41422e-05	0.000126778
BnaAnng16880D	GSBRNA2T00029721001	BnaA08G0078300ZS	0	15	0.001	0.293323	8.19635	Up	2.79984e-05	8.21499e-05
BnaA02g06870D	GSBRNA2T00029760001	BnaA02G0103100ZS	46	205	0.418225	1.88395	2.17141	Up	9.89802e-26	7.64191e-25
BnaA02g06880D	GSBRNA2T00029761001	BnaA02G0103200ZS	11	52	0.0589438	0.281652	2.2565	Up	7.9995e-08	2.92018e-07
BnaA02g06890D	GSBRNA2T00029762001	BnaA02G0103300ZS	13	0	0.265743	0.001	-8.05389	Down	0.000131576	0.000358618
BnaA06g01970D	GSBRNA2T00029830001	BnaC06G0062100ZS	16	0	0.063104	0.001	-5.97966	Down	1.67134e-05	5.00766e-05
BnaCnng36680D	GSBRNA2T00029880001	BnaC04G0348900ZS	2549	1036	16.5399	6.79497	-1.28341	Down	9.01582e-142	2.84943e-140
BnaCnng77750D	GSBRNA2T00029913001	BnaC05G0537900.1ZS	38	120	0.593254	1.89366	1.67446	Up	1.74783e-11	8.01425e-11
BnaCnng36840D	GSBRNA2T00029963001	BnaC03G0260100ZS	74	18	2.85731	0.702526	-2.02403	Down	2.60616e-09	1.05122e-08
BnaCnng36850D	GSBRNA2T00029964001	BnaA06G0052200ZS	0	17	0.001	0.152535	7.253	Up	6.9246e-06	2.15552e-05
BnaA01g37100D	GSBRNA2T00029977001	BnaA01G0354000ZS	148	51	0.735514	0.256191	-1.52153	Down	4.24338e-12	2.00799e-11
BnaA07g35950D	GSBRNA2T00030003001	BnaA07G0011400ZS	1371	556	8.50217	3.48524	-1.28658	Down	2.04918e-77	3.71176e-76
BnaA07g35980D	GSBRNA2T00030007001	BnaA07G0011700ZS	76	37	2.10351	1.03514	-1.02298	Down	0.000283166	0.000741044
BnaA05g34760D	GSBRNA2T00030013001	BnaC04G0080200ZS	2	24	0.0296454	0.359587	3.60046	Up	4.98528e-06	1.57369e-05
BnaAnng17200D	GSBRNA2T00030031001	BnaC08G0341000ZS	146	315	0.90541	1.97455	1.12488	Up	7.17556e-16	4.01078e-15
BnaAnng41280D	GSBRNA2T00030041001	BnaA07G0310700ZS	17	108	0.1273	0.817465	2.68292	Up	7.79068e-18	4.70928e-17
BnaCnng36920D	GSBRNA2T00030080001	BnaC01G0107200ZS	6618	1459	50.6486	11.2865	-2.16592	Down	0	0
BnaCnng36930D	GSBRNA2T00030081001	BnaC07G0253400ZS	835	3085	8.02727	29.9779	1.90092	Up	6e-306	4.40378e-304
BnaA01g37280D	GSBRNA2T00030094001	BnaA08G0269900ZS	203	405	2.84709	5.7415	1.01194	Up	4.70524e-17	2.76466e-16
BnaAnng17240D	GSBRNA2T00030103001	Bnascaffold0026G0022300ZS	3730	7775	39.8154	83.8895	1.07516	Up	0	0
BnaAnng17250D	GSBRNA2T00030104001	Bnascaffold0027G0004100ZS	152	619	1.58465	6.52295	2.04136	Up	6.37348e-69	1.04406e-67
BnaA01g34850D	GSBRNA2T00030135001		39	122	0.281051	0.888679	1.66083	Up	1.55621e-11	7.15396e-11
BnaCnng77970D	GSBRNA2T00030175001	Bnascaffold0509G0000400ZS	67	21	1.64999	0.522746	-1.65828	Down	7.72978e-07	2.61341e-06
BnaCnng77980D	GSBRNA2T00030176001	Bnascaffold0509G0000300ZS	68	17	2.06482	0.521779	-1.9845	Down	1.78795e-08	6.83052e-08
BnaAnng41330D	GSBRNA2T00030184001	BnaC06G0393000ZS	0	666	0.001	9.16751	13.1623	Up	8.99804e-203	4.1678e-201
BnaC01g40850D	GSBRNA2T00030217001	BnaC01G0114300ZS	113	281	0.735266	1.84815	1.32974	Up	3.53602e-18	2.1615e-17
BnaC01g40900D	GSBRNA2T00030222001	BnaC01G0114900ZS	31	4	0.430913	0.0562021	-2.9387	Down	2.25858e-06	7.34948e-06
BnaCnng37030D	GSBRNA2T00030242001	BnaC07G0219400ZS	3	69	0.0306627	0.712857	4.53906	Up	9.57516e-18	5.77131e-17
BnaCnng37050D	GSBRNA2T00030244001	BnaC09G0208800ZS	581	190	3.12222	1.03206	-1.59704	Down	4.00894e-46	4.79054e-45
BnaAnng41350D	GSBRNA2T00030290001	BnaC09G0193400ZS	16	43	0.649889	1.76544	1.44176	Up	0.000336972	0.000874303
BnaAnng41370D	GSBRNA2T00030297001	BnaA07G0105800ZS	448	91	4.71243	0.967549	-2.28406	Down	4.98524e-57	7.01195e-56
BnaA04g28860D	GSBRNA2T00030322001	BnaA04G0208200ZS	10	37	0.15638	0.584853	1.90302	Up	5.28694e-05	0.000150592
BnaA04g28870D	GSBRNA2T00030323001	BnaA04G0208100ZS	86	4	1.45391	0.0683539	-4.41077	Down	3.52726e-21	2.3861e-20
BnaA04g28930D	GSBRNA2T00030330001	BnaA04G0207700ZS	0	14	0.001	0.0589598	5.88166	Up	5.6299e-05	0.000159957
BnaCnng37160D	GSBRNA2T00030342001	BnaC04G0194300ZS	71	146	0.578279	1.20198	1.05557	Up	1.90286e-07	6.74417e-07
BnaA03g56620D	GSBRNA2T00030386001	BnaA03G0195000ZS	1156	436	12.9433	4.93445	-1.39125	Down	1.06379e-73	1.85716e-72
BnaCnng78190D	GSBRNA2T00030432001	BnaC03G0069700ZS	3	32	0.0823051	0.887401	3.43053	Up	1.93116e-07	6.84216e-07
BnaCnng37250D	GSBRNA2T00030485001	BnaC09G0418000ZS	8	37	0.0570382	0.26665	2.22495	Up	7.8465e-06	2.42704e-05
BnaCnng78220D	GSBRNA2T00030546001	BnaC04G0229500ZS	69	438	0.463762	2.97567	2.68176	Up	8.98478e-68	1.45172e-66
BnaC06g41570D	GSBRNA2T00030568001	BnaC06G0088300ZS	70	20	0.861935	0.248927	-1.79186	Down	9.55304e-08	3.47002e-07
BnaC06g41620D	GSBRNA2T00030576001	BnaC06G0087800ZS	354	140	8.51668	3.40455	-1.32283	Down	4.44728e-22	3.0944e-21
BnaA06g39400D	GSBRNA2T00030589001	BnaC07G0351900ZS	532	1060	3.83677	7.72725	1.01006	Up	6.29994e-42	6.97569e-41
BnaA06g39440D	GSBRNA2T00030593001	BnaA06G0343300ZS	30	96	0.91988	2.9754	1.69357	Up	1.37612e-09	5.65304e-09
BnaC05g51970D	GSBRNA2T00030602001	BnaC05G0445500ZS	105	221	2.11869	4.5075	1.08915	Up	4.7112e-11	2.11265e-10
BnaCnng37390D	GSBRNA2T00030614001	BnaA06G0445700.1ZS	1379	593	4.29719	1.86784	-1.20202	Down	3.6457e-70	6.08776e-69
BnaCnng78300D	GSBRNA2T00030680001	BnaC09G0290700ZS	0	34	0.001	0.236234	7.88407	Up	4.8209e-11	2.16092e-10
BnaAnng17420D	GSBRNA2T00030701001	BnaA10G0188300ZS	89	39	0.764714	0.338718	-1.17484	Down	1.09611e-05	3.34695e-05
BnaA03g56700D	GSBRNA2T00030712001		2	4747	0.0259193	62.1837	11.2283	Up	0	0
BnaC07g47960D	GSBRNA2T00030734001	Bnascaffold0093G0000300ZS	22	0	0.153587	0.001	-7.26291	Down	2.69676e-07	9.44562e-07
BnaA02g26440D	GSBRNA2T00030834001	BnaA02G0323500ZS	9	44	0.0216027	0.106754	2.305	Up	5.98798e-07	2.04174e-06
BnaA02g26170D	GSBRNA2T00030875001	BnaA02G0320300ZS	312	135	6.9867	3.05574	-1.19309	Down	6.05876e-17	3.54264e-16
BnaA02g25990D	GSBRNA2T00030901001	BnaA02G0318200ZS	10	108	0.187281	2.04448	3.44846	Up	2.06166e-22	1.44852e-21
BnaC02g19910D	GSBRNA2T00030953001	BnaA02G0188700ZS	54	168	0.247518	0.778373	1.65293	Up	2.93424e-15	1.60032e-14
BnaC02g19920D	GSBRNA2T00030954001	BnaC02G0249500ZS	58	7	0.893598	0.109013	-3.03513	Down	3.15266e-11	1.42746e-10
BnaC02g19960D	GSBRNA2T00030964001	BnaC02G0250100ZS	1	44	0.0183976	0.818236	5.47493	Up	1.05375e-12	5.13826e-12
BnaC02g20340D	GSBRNA2T00031036001	BnaC02G0253700ZS	222	534	2.07468	5.04433	1.28178	Up	2.15316e-31	1.92063e-30
BnaC02g20430D	GSBRNA2T00031060001	BnaC02G0255200ZS	93	540	0.403794	2.36993	2.55315	Up	8.44058e-79	1.55188e-77
BnaC05g23890D	GSBRNA2T00031116001	BnaA09G0406800ZS	15	1	0.122491	0.00825422	-3.89139	Down	0.000297806	0.000776945
BnaC05g23710D	GSBRNA2T00031149001	BnaC02G0194300ZS	0	185	0.001	3.30425	11.6901	Up	7.48968e-57	1.05144e-55
BnaC05g23290D	GSBRNA2T00031208001	BnaC05G0262800ZS	32	80	0.474327	1.19862	1.33742	Up	3.46736e-06	1.10914e-05
BnaC07g34520D	GSBRNA2T00031246001	BnaC07G0416800ZS	211	104	2.30473	1.14825	-1.00516	Down	2.19042e-09	8.88467e-09
BnaC07g34140D	GSBRNA2T00031293001	BnaA03G0438700ZS	58	129	0.372485	0.837405	1.16874	Up	1.07486e-07	3.88657e-07
BnaC07g33360D	GSBRNA2T00031400001	BnaC07G0405100ZS	54	155	0.878111	2.54772	1.53673	Up	6.47592e-13	3.19259e-12
BnaC09g43580D	GSBRNA2T00031521001	BnaC09G0526100ZS	96	0	1.82337	0.001	-10.8324	Down	2.12204e-29	1.80462e-28
BnaC09g43110D	GSBRNA2T00031591001	BnaC09G0518300ZS	28	6	0.57237	0.123975	-2.2069	Down	0.000132458	0.000360715
BnaC09g43040D	GSBRNA2T00031600001	BnaC09G0517500ZS	61	8	0.592494	0.0785433	-2.91524	Down	2.44256e-11	1.11088e-10
BnaC09g42730D	GSBRNA2T00031645001	BnaC09G0514300ZS	310	944	2.28668	7.03852	1.62201	Up	1.98892e-76	3.57611e-75
BnaC08g45480D	GSBRNA2T00031665001	BnaA09G0670000ZS	531	257	3.12759	1.53008	-1.03145	Down	2.81936e-22	1.97218e-21
BnaC08g45470D	GSBRNA2T00031666001	BnaC05G0055100ZS	2675	1309	18.6748	9.23712	-1.01558	Down	9.21382e-103	2.12115e-101
BnaC08g45320D	GSBRNA2T00031686001	Bnascaffold0696G0000100ZS	87	37	1.06567	0.458109	-1.21799	Down	7.7117e-06	2.38746e-05
BnaC08g44820D	GSBRNA2T00031741001	BnaA09G0676100ZS	959	461	4.33017	2.10403	-1.04127	Down	1.67129e-39	1.76882e-38
BnaC08g44600D	GSBRNA2T00031770001	BnaA09G0678100ZS	16	86	0.12407	0.674077	2.44176	Up	3.6701e-13	1.83013e-12
BnaC08g44140D	GSBRNA2T00031824001	Bnascaffold0469G0000200ZS	2	18	0.019129	0.17402	3.18542	Up	0.000201672	0.000537736
BnaC08g43810D	GSBRNA2T00031867001	BnaA09G0706300ZS	1981	4093	3.7856	7.90599	1.06243	Up	4.79074e-170	1.83816e-168
BnaC08g43750D	GSBRNA2T00031874001	BnaA09G0706800ZS	150	321	0.480675	1.03975	1.11311	Up	6.7287e-16	3.76703e-15
BnaC08g43730D	GSBRNA2T00031878001	BnaA09G0707000ZS	1150	518	6.3923	2.91041	-1.13511	Down	7.82994e-54	1.054e-52
BnaC05g03490D	GSBRNA2T00031909001	BnaC05G0037500ZS	5	28	0.0720644	0.407918	2.50092	Up	3.3813e-05	9.83057e-05
BnaC05g03820D	GSBRNA2T00031949001	BnaC05G0040800ZS	63	167	0.414818	1.11147	1.42192	Up	1.85027e-12	8.91317e-12
BnaC05g04400D	GSBRNA2T00032016001	BnaC05G0046000ZS	39	7	0.554437	0.100589	-2.46255	Down	1.28034e-06	4.25155e-06
BnaC05g04550D	GSBRNA2T00032034001	BnaA10G0047000ZS	0	210	0.001	0.889929	9.79755	Up	1.95095e-64	3.02943e-63
BnaC05g04560D	GSBRNA2T00032035001	BnaA10G0041100ZS	0	14	0.001	0.0937694	6.55104	Up	5.6299e-05	0.000159914
BnaC05g04730D	GSBRNA2T00032052001	BnaC05G0049300ZS	405	179	1.2274	0.548338	-1.16247	Down	9.88428e-21	6.59039e-20
BnaC05g04750D	GSBRNA2T00032054001	BnaC05G0049500ZS	255	513	2.22775	4.53012	1.02396	Up	1.41127e-21	9.6727e-21
BnaC05g04800D	GSBRNA2T00032061001	BnaA10G0049600ZS	312	70	3.58314	0.812591	-2.14062	Down	3.20412e-37	3.25396e-36
BnaC05g04870D	GSBRNA2T00032068001	BnaA10G0050300ZS	124	419	1.06447	3.63572	1.77211	Up	2.64626e-39	2.79062e-38
BnaC05g04880D	GSBRNA2T00032069001	BnaC05G0050600ZS	132	335	1.35655	3.47993	1.35912	Up	4.70922e-22	3.27479e-21
BnaC05g04990D	GSBRNA2T00032082001	BnaC05G0051700ZS	68	238	0.183447	0.648998	1.82285	Up	7.37806e-24	5.40279e-23
BnaC05g05060D	GSBRNA2T00032090001	BnaA10G0052500ZS	133	590	0.81723	3.66445	2.16478	Up	8.79874e-71	1.47835e-69
BnaC05g05070D	GSBRNA2T00032092001	BnaC05G0052500.1ZS	3359	1624	15.7191	7.68189	-1.03298	Down	3.93098e-132	1.16269e-130
BnaC05g05150D	GSBRNA2T00032100001	BnaC05G0053200ZS	13	117	0.274721	2.49919	3.18542	Up	1.35689e-22	9.58305e-22
BnaC05g05250D	GSBRNA2T00032112001	BnaC05G0054500ZS	29	64	0.107338	0.239441	1.15752	Up	0.00021379	0.000568187
BnaC05g29810D	GSBRNA2T00032146001	BnaC05G0355000ZS	2	373	0.0131044	2.47037	7.55853	Up	1.24231e-109	3.02023e-108
BnaC05g29770D	GSBRNA2T00032150001	BnaC05G0354900ZS	89	24	1.19466	0.325634	-1.87527	Down	5.1223e-10	2.16312e-09
BnaC05g29760D	GSBRNA2T00032151001	BnaC05G0354800ZS	15	111	0.13481	1.00837	2.90302	Up	9.34538e-20	6.03037e-19
BnaC05g29680D	GSBRNA2T00032165001	BnaC05G0353900ZS	27	64	0.172572	0.413476	1.26061	Up	7.4938e-05	0.000209905
BnaC05g29560D	GSBRNA2T00032189001		97	21	2.8893	0.632273	-2.1921	Down	6.6657e-13	3.28372e-12
BnaC05g29550D	GSBRNA2T00032190001	BnaA08G0071400ZS	259	33	1.40471	0.180911	-2.95692	Down	2.19078e-44	2.53687e-43
BnaC05g29490D	GSBRNA2T00032205001	BnaC05G0351800ZS	919	424	2.90329	1.35396	-1.1005	Down	2.43274e-41	2.66312e-40
BnaCnng02580D	GSBRNA2T00032257001	BnaC09G0608400ZS	1	703	0.00597629	4.2467	9.47288	Up	1.90372e-211	9.26867e-210
BnaCnng02590D	GSBRNA2T00032258001	BnaC09G0608500ZS	12	4727	0.05022	19.9961	8.63724	Up	0	0
BnaCnng02600D	GSBRNA2T00032259001	BnaC09G0608600ZS	2551	8541	18.7877	63.5822	1.75884	Up	0	0
BnaCnng02610D	GSBRNA2T00032260001	BnaC09G0608700.2ZS	216	2722	0.784926	9.99834	3.67106	Up	0	0
BnaCnng02620D	GSBRNA2T00032261001	BnaC09G0608800ZS	0	705	0.001	4.36727	12.0925	Up	1.32669e-214	6.57278e-213
BnaCnng02630D	GSBRNA2T00032263001	BnaC09G0608900ZS	2	471	0.0360876	8.59041	7.89508	Up	3.67326e-139	1.14464e-137
BnaCnng02640D	GSBRNA2T00032264001	BnaC09G0609000ZS	1	23	0.0036283	0.084352	4.53906	Up	1.36859e-06	4.53494e-06
BnaCnng02650D	GSBRNA2T00032265001	BnaC09G0609200ZS	0	190	0.001	1.1824	10.2075	Up	2.27834e-58	3.25452e-57
BnaCnng02660D	GSBRNA2T00032266001	BnaC09G0609300ZS	518	2593	2.57158	13.0118	2.33909	Up	0	0
BnaCnng02670D	GSBRNA2T00032267001	BnaC09G0609400ZS	4	5841	0.0396316	58.497	10.5275	Up	0	0
BnaCnng02680D	GSBRNA2T00032268001	BnaA10G0290300ZS	4	5781	0.0131596	19.2243	10.5126	Up	0	0
BnaCnng02720D	GSBRNA2T00032273001	BnaC09G0610000ZS	107	309	2.52886	7.38183	1.54549	Up	1.80098e-24	1.34255e-23
BnaCnng02730D	GSBRNA2T00032274001	BnaC09G0610100.1ZS	1	18	0.00824497	0.150012	4.18542	Up	3.63346e-05	0.000105257
BnaCnng02740D	GSBRNA2T00032275001	BnaC09G0610000ZS	0	84	0.001	5.41949	12.4039	Up	3.27112e-26	2.55538e-25
BnaCnng02750D	GSBRNA2T00032276001	BnaC09G0610100.1ZS	12	4135	0.050086	17.4452	8.44421	Up	0	0
BnaCnng02760D	GSBRNA2T00032277001	BnaC09G0610200ZS	0	306	0.001	3.47145	11.7613	Up	1.46844e-93	3.12633e-92
BnaCnng02770D	GSBRNA2T00032278001	BnaC09G0610300ZS	1	15	0.0117579	0.178273	3.92239	Up	0.000253188	0.00066635
BnaCnng02790D	GSBRNA2T00032281001	BnaC09G0610400ZS	196	1339	3.01974	20.8526	2.78773	Up	3.07168e-212	1.5025e-210
BnaCnng02800D	GSBRNA2T00032282001	BnaC09G0610500ZS	7	431	0.106106	6.60363	5.95969	Up	8.6254e-119	2.26195e-117
BnaCnng02820D	GSBRNA2T00032284001	BnaC09G0610700ZS	244	3121	0.72934	9.42972	3.69255	Up	0	0
BnaCnng02860D	GSBRNA2T00032289001	BnaC09G0611000ZS	60	1224	0.349018	7.19686	4.36599	Up	6.02694e-286	4.02838e-284
BnaCnng02880D	GSBRNA2T00032294001	BnaC09G0611200ZS	315	1745	1.94574	10.8952	2.4853	Up	5.47326e-243	3.06114e-241
BnaCnng02900D	GSBRNA2T00032296001	BnaC09G0611400ZS	762	12674	3.5677	59.9808	4.07143	Up	0	0
BnaCnng02910D	GSBRNA2T00032297001	BnaC02G0541800ZS	41	453	1.25717	14.0402	3.48131	Up	3.79956e-90	7.84554e-89
BnaCnng02920D	GSBRNA2T00032299001	BnaC09G0611500ZS	651	3455	4.37863	23.4893	2.42345	Up	0	0
BnaCnng02930D	GSBRNA2T00032300001	BnaC09G0611500ZS	62	215	1.61592	5.66412	1.80949	Up	1.69719e-21	1.16031e-20
BnaCnng02940D	GSBRNA2T00032301001	BnaC09G0611600.4ZS	775	7824	1.65002	16.8377	3.35113	Up	0	0
BnaCnng02950D	GSBRNA2T00032302001	BnaC09G0611700ZS	1	41	0.00520976	0.215907	5.37305	Up	8.0203e-12	3.74664e-11
BnaCnng02960D	GSBRNA2T00032303001	BnaC09G0611800ZS	0	35	0.001	0.203397	7.66815	Up	2.3975e-11	1.09113e-10
BnaCnng02970D	GSBRNA2T00032306001	BnaC09G0611900ZS	195	8999	2.36694	110.411	5.54371	Up	0	0
BnaCnng02980D	GSBRNA2T00032307001	BnaC09G0612000ZS	61	177	1.00589	2.95024	1.55236	Up	9.67168e-15	5.17406e-14
BnaCnng03030D	GSBRNA2T00032316001	BnaC09G0612700ZS	0	44	0.001	0.374933	8.55049	Up	4.4611e-14	2.32151e-13
BnaCnng03040D	GSBRNA2T00032317001	BnaC09G0612800ZS	137	3213	0.715724	16.9668	4.56717	Up	0	0
BnaCnng03050D	GSBRNA2T00032318001	BnaC09G0612900ZS	73	545	0.449438	3.39162	2.91578	Up	1.38186e-91	2.88832e-90
BnaCnng03060D	GSBRNA2T00032319001	BnaC09G0613000ZS	136	1165	1.29549	11.2172	3.11415	Up	7.11438e-207	3.36547e-205
BnaCnng03080D	GSBRNA2T00032321001	BnaC09G0613200ZS	6	1138	0.0310517	5.95307	7.58282	Up	0	0
BnaCnng03090D	GSBRNA2T00032322001	BnaC09G0613300ZS	177	558	1.57567	5.021	1.67201	Up	7.47488e-48	9.20216e-47
BnaCnng03110D	GSBRNA2T00032324001	BnaC09G0613500ZS	185	1123	1.01332	6.21754	2.61726	Up	1.65035e-166	6.17706e-165
BnaCnng03130D	GSBRNA2T00032326001	BnaC09G0613700ZS	3	697	0.0147993	3.47551	7.87555	Up	2.5858e-205	1.21304e-203
BnaCnng03140D	GSBRNA2T00032327001	BnaC09G0613800ZS	4587	17142	60.2784	227.698	1.91741	Up	0	0
BnaCnng03150D	GSBRNA2T00032328001	BnaC09G0613900ZS	46	1607	0.263497	9.30461	5.14209	Up	0	0
BnaCnng03180D	GSBRNA2T00032334001	BnaC09G0614200ZS	4	27	0.0316185	0.215729	2.77038	Up	1.69328e-05	5.0701e-05
BnaCnng03190D	GSBRNA2T00032336001	BnaC09G0614400ZS	1661	6734	10.6672	43.7139	2.03491	Up	0	0
BnaCnng03200D	GSBRNA2T00032337001	BnaC09G0614500ZS	280	1260	1.37046	6.23368	2.18542	Up	6.95346e-151	2.34845e-149
BnaCnng03210D	GSBRNA2T00032338001	BnaC09G0614600ZS	0	615	0.001	1.61169	10.6544	Up	2.66654e-187	1.13147e-185
BnaCnng03220D	GSBRNA2T00032339001	BnaC09G0614700ZS	167	674	0.873912	3.56513	2.0284	Up	2.76336e-74	4.85661e-73
BnaCnng03230D	GSBRNA2T00032340001	BnaC09G0614800ZS	53	4669	0.160054	14.2521	6.47647	Up	0	0
BnaCnng03280D	GSBRNA2T00032346001	BnaC09G0615300ZS	1394	5923	8.16964	35.087	2.10259	Up	0	0
BnaCnng03310D	GSBRNA2T00032350001	BnaC09G0615500ZS	0	2200	0.001	21.1398	14.3677	Up	0	0
BnaCnng03340D	GSBRNA2T00032353001	BnaC09G0615800ZS	24	102	0.421698	1.81157	2.10296	Up	4.85686e-13	2.40768e-12
BnaCnng03350D	GSBRNA2T00032354001	BnaC09G0615900ZS	4	328	0.0660759	5.47674	6.37305	Up	1.01127e-92	2.13873e-91
BnaCnng03360D	GSBRNA2T00032355001	BnaC09G0616000ZS	709	6007	2.94484	25.2196	3.09828	Up	0	0
BnaCnng03370D	GSBRNA2T00032356001	BnaC09G0616100ZS	394	2746	5.47676	38.5827	2.81656	Up	0	0
BnaCnng03380D	GSBRNA2T00032357001	BnaC09G0616200ZS	50	337	0.340449	2.31941	2.76824	Up	2.63304e-54	3.56598e-53
BnaCnng03410D	GSBRNA2T00032363001	BnaC09G0616700ZS	0	26	0.001	0.195084	7.60795	Up	1.28848e-08	4.97578e-08
BnaCnng03430D	GSBRNA2T00032365001	BnaC09G0616800ZS	73	3190	0.643139	28.4078	5.46501	Up	0	0
BnaCnng03440D	GSBRNA2T00032366001	BnaC09G0616900ZS	598	3004	2.33885	11.8759	2.34416	Up	0	0
BnaCnng03460D	GSBRNA2T00032369001	BnaA03G0572200ZS	734	4033	8.79561	48.8498	2.4735	Up	0	0
BnaCnng03470D	GSBRNA2T00032370001	BnaC03G0498600ZS	1946	8103	16.3904	68.9854	2.07344	Up	0	0
BnaCnng03480D	GSBRNA2T00032371001	BnaC09G0617100ZS	140	489	2.95853	10.4453	1.8199	Up	3.0751e-47	3.73799e-46
BnaCnng03490D	GSBRNA2T00032372001	BnaC09G0617100ZS	18	410	0.356308	8.20355	4.52505	Up	4.78454e-99	1.06859e-97
BnaCnng03500D	GSBRNA2T00032373001	BnaC09G0617100ZS	233	509	4.38993	9.69359	1.14283	Up	2.7069e-25	2.0649e-24
BnaCnng03510D	GSBRNA2T00032375001	BnaA10G0296600ZS	6	485	0.0332919	2.72016	6.35237	Up	2.28102e-136	6.9659e-135
BnaCnng03520D	GSBRNA2T00032377001	BnaC09G0618200ZS	85	440	0.500965	2.62123	2.38746	Up	8.54002e-60	1.24563e-58
BnaCnng03530D	GSBRNA2T00032378001	BnaC09G0618300ZS	649	4595	0.946297	6.77225	2.83927	Up	0	0
BnaCnng03540D	GSBRNA2T00032379001	BnaC09G0618400ZS	253	1711	1.82043	12.4442	2.77313	Up	3.70686e-269	2.33905e-267
BnaCnng03550D	GSBRNA2T00032380001	BnaC09G0618500ZS	293	850	4.16539	12.2144	1.55206	Up	7.99564e-65	1.24684e-63
BnaCnng03560D	GSBRNA2T00032381001	BnaC09G0618600ZS	49	832	0.255137	4.3789	4.10123	Up	8.67592e-187	3.67077e-185
BnaCnng03570D	GSBRNA2T00032382001	BnaC09G0618700ZS	10	207	0.0747037	1.56306	4.38705	Up	9.29152e-50	1.17523e-48
BnaCnng03580D	GSBRNA2T00032384001	BnaC09G0618800.1ZS	368	1807	1.11815	5.5498	2.31131	Up	6.95206e-231	3.69381e-229
BnaCnng03590D	GSBRNA2T00032385001	BnaC09G0618900ZS	1592	5680	15.5598	56.1143	1.85055	Up	0	0
BnaCnng03600D	GSBRNA2T00032386001	BnaC09G0619000ZS	0	139	0.001	1.23899	10.275	Up	6.75182e-43	7.61168e-42
BnaCnng03610D	GSBRNA2T00032387001	BnaC09G0619100ZS	0	350	0.001	14.9524	13.8681	Up	6.58624e-107	1.56488e-105
BnaCnng03620D	GSBRNA2T00032389001	BnaC09G0619200ZS	187	14	2.58788	0.195837	-3.72404	Down	1.16273e-39	1.23558e-38
BnaCnng03640D	GSBRNA2T00032391001	BnaC09G0619300ZS	24	631	0.114076	3.03165	4.73203	Up	1.11629e-155	3.90317e-154
BnaCnng03650D	GSBRNA2T00032392001	BnaC09G0619400ZS	1296	5691	14.0579	62.3977	2.15011	Up	0	0
BnaCnng03670D	GSBRNA2T00032394001	BnaC09G0619600ZS	34	643	0.205154	3.92172	4.25671	Up	1.67935e-148	5.58434e-147
BnaCnng03690D	GSBRNA2T00032396001	BnaC09G0619800ZS	0	14	0.001	0.0787062	6.29841	Up	5.6299e-05	0.000159808
BnaCnng03720D	GSBRNA2T00032399001	BnaC09G0620000ZS	180	1796	1.34467	13.5617	3.33421	Up	0	0
BnaCnng03730D	GSBRNA2T00032400001	BnaC09G0620100ZS	329	2768	0.970429	8.25275	3.08818	Up	0	0
BnaCnng03740D	GSBRNA2T00032402001	BnaC09G0620200ZS	530	2855	2.80004	15.2461	2.44492	Up	0	0
BnaCnng03770D	GSBRNA2T00032408001	BnaC09G0620500ZS	144	885	0.71224	4.42458	2.6351	Up	1.33353e-132	3.95385e-131
BnaCnng03780D	GSBRNA2T00032410001	BnaC09G0620700ZS	10	599	0.0529502	3.20597	5.91998	Up	3.64194e-164	1.34528e-162
BnaCnng03800D	GSBRNA2T00032412001	BnaC09G0620900ZS	0	44	0.001	0.47637	8.89594	Up	4.4611e-14	2.32118e-13
BnaCnng03810D	GSBRNA2T00032414001	BnaC09G0621100ZS	110	1030	0.497161	4.7055	3.24256	Up	2.8894e-190	1.2455e-188
BnaCnng03840D	GSBRNA2T00032417001	BnaC09G0621300ZS	49	1772	0.32241	11.7853	5.19195	Up	0	0
BnaCnng03850D	GSBRNA2T00032418001	BnaC09G0621400ZS	124	978	0.72762	5.80078	2.99499	Up	2.004e-167	7.5625e-166
BnaCnng03860D	GSBRNA2T00032419001	BnaC09G0621500ZS	3	54	0.0155087	0.282172	4.18542	Up	1.7068e-13	8.63681e-13
BnaCnng03870D	GSBRNA2T00032420001	BnaC09G0621600ZS	1	438	0.00542357	2.40118	8.79028	Up	2.93712e-131	8.64199e-130
BnaCnng03890D	GSBRNA2T00032423001	BnaC09G0621800ZS	63	213	0.256672	0.877166	1.77293	Up	9.23822e-21	6.16635e-20
BnaCnng03900D	GSBRNA2T00032425001	BnaC09G0621900ZS	0	246	0.001	1.69187	10.7244	Up	2.3387e-75	4.16215e-74
BnaCnng03930D	GSBRNA2T00032428001	BnaC09G0622200ZS	52	1392	0.205261	5.55401	4.758	Up	0	0
BnaCnng03940D	GSBRNA2T00032430001	BnaC02G0048600ZS	0	60	0.001	0.198136	7.63035	Up	6.24516e-19	3.91647e-18
BnaCnng03960D	GSBRNA2T00032432001	BnaC09G0622300ZS	7	118	0.0337337	0.574794	4.09078	Up	1.15163e-27	9.36779e-27
BnaCnng03970D	GSBRNA2T00032435001	BnaC09G0622400ZS	0	16	0.001	0.150095	7.22973	Up	1.3924e-05	4.20697e-05
BnaC03g70880D	GSBRNA2T00032479001	BnaA05G0152100ZS	7	28	0.0282249	0.114119	2.0155	Up	0.000276774	0.000725067
BnaC03g70790D	GSBRNA2T00032489001	BnaC09G0012600ZS	178	1128	1.57709	10.102	2.67931	Up	1.30401e-171	5.06966e-170
BnaC03g70710D	GSBRNA2T00032501001	BnaC03G0813200ZS	2	20	0.0133373	0.134813	3.33742	Up	5.95582e-05	0.000168642
BnaC03g70370D	GSBRNA2T00032543001	BnaC04G0069300ZS	3	27	0.0201636	0.183432	3.18542	Up	4.05862e-06	1.2909e-05
BnaC03g70270D	GSBRNA2T00032562001	BnaA05G0162600ZS	13	125	0.258424	2.51168	3.28084	Up	1.12954e-24	8.46933e-24
BnaC03g70260D	GSBRNA2T00032563001	BnaA05G0162500ZS	97	551	0.751552	4.31523	2.52149	Up	2.96266e-79	5.46219e-78
BnaC09g39310D	GSBRNA2T00032604001	BnaC09G0480300ZS	166	451	0.851581	2.33862	1.45744	Up	3.28756e-32	2.98926e-31
BnaC09g39380D	GSBRNA2T00032621001	BnaC09G0480900ZS	5382	2041	59.2006	22.6929	-1.38337	Down	0	0
BnaC09g39460D	GSBRNA2T00032632001	BnaC09G0481200ZS	387	1547	2.36402	9.55202	2.01456	Up	1.21515e-166	4.55514e-165
BnaC09g39490D	GSBRNA2T00032637001	BnaC09G0481200ZS	6040	86	16.1735	0.232772	-6.11857	Down	0	0
BnaC09g39500D	GSBRNA2T00032639001	BnaC09G0481200ZS	258	37	2.22906	0.323123	-2.78628	Down	1.14344e-41	1.25982e-40
BnaC09g39510D	GSBRNA2T00032642001	BnaC09G0481500ZS	82	0	1.30848	0.001	-10.3537	Down	3.22558e-25	2.45469e-24
BnaC09g39520D	GSBRNA2T00032643001	BnaC09G0481200ZS	932	208	3.27887	0.739668	-2.14825	Down	2.58076e-108	6.19814e-107
BnaC09g39530D	GSBRNA2T00032644001	BnaC09G0481200ZS	54	13	2.62523	0.638826	-2.03895	Down	3.44868e-07	1.19865e-06
BnaC09g39590D	GSBRNA2T00032655001	BnaC09G0481200ZS	45	140	0.38454	1.20927	1.65293	Up	5.9397e-13	2.93376e-12
BnaC09g39690D	GSBRNA2T00032667001	BnaC09G0484000ZS	87	189	1.64909	3.6212	1.13479	Up	3.21646e-10	1.37484e-09
BnaC09g11340D	GSBRNA2T00032748001	BnaC09G0142500ZS	56	9	0.673635	0.109432	-2.62193	Down	1.53202e-09	6.27591e-09
BnaC09g11500D	GSBRNA2T00032769001	BnaC09G0143800ZS	153	324	2.88266	6.17038	1.09796	Up	1.02642e-15	5.70631e-15
BnaC09g11680D	GSBRNA2T00032796001	BnaC09G0145300ZS	0	26	0.001	0.464382	8.85917	Up	1.28848e-08	4.97473e-08
BnaC09g11700D	GSBRNA2T00032798001	BnaC09G0143700.1ZS	0	79	0.001	0.366199	8.51649	Up	1.07532e-24	8.0669e-24
BnaC09g11730D	GSBRNA2T00032804001	BnaC09G0145700ZS	31	66	0.234759	0.505206	1.10569	Up	0.00028949	0.000756676
BnaC09g11740D	GSBRNA2T00032806001	BnaC09G0145900ZS	9817	1550	50.9462	8.13073	-2.64752	Down	0	0
BnaC09g11890D	GSBRNA2T00032823001	BnaC09G0147100ZS	33	7	0.171162	0.0366991	-2.22154	Down	2.93268e-05	8.5862e-05
BnaC09g12000D	GSBRNA2T00032836001	BnaC09G0148100.1ZS	73	8	0.332981	0.0368852	-3.17433	Down	2.34782e-14	1.23502e-13
BnaA04g12710D	GSBRNA2T00032842001	BnaA04G0144100ZS	845	71	9.75209	0.828255	-3.55756	Down	1.93664e-167	7.31582e-166
BnaA04g12720D	GSBRNA2T00032843001	BnaC04G0435300ZS	1112	486	5.7454	2.53815	-1.17863	Down	3.11722e-55	4.27382e-54
BnaA04g12790D	GSBRNA2T00032852001	BnaA04G0145000ZS	1499	6806	7.57801	34.7784	2.1983	Up	0	0
BnaA04g12810D	GSBRNA2T00032854001	BnaA04G0145200ZS	0	22	0.001	0.36224	8.5008	Up	2.10646e-07	7.43845e-07
BnaA04g12860D	GSBRNA2T00032859001	BnaA04G0146000ZS	1284	140	12.1692	1.34119	-3.18165	Down	2.4171e-229	1.27687e-227
BnaA04g12890D	GSBRNA2T00032865001	BnaA04G0146100ZS	161	346	1.10104	2.39176	1.11921	Up	3.70954e-17	2.18733e-16
BnaA04g12960D	GSBRNA2T00032878001	BnaA04G0146900ZS	2	49	0.0202871	0.502401	4.63021	Up	4.72686e-13	2.34466e-12
BnaA04g12990D	GSBRNA2T00032884001	BnaA04G0147200ZS	286	771	2.23251	6.0834	1.44621	Up	2.84444e-53	3.79965e-52
BnaA04g13040D	GSBRNA2T00032890001	BnaA04G0147700ZS	275	42	1.36306	0.210424	-2.69547	Down	8.18006e-43	9.19636e-42
BnaA04g13110D	GSBRNA2T00032900001	BnaC09G0121200ZS	0	365	0.001	2.15682	11.0747	Up	1.85399e-111	4.57557e-110
BnaA04g13130D	GSBRNA2T00032902001	BnaC04G0440800ZS	313	133	0.480342	0.206311	-1.21924	Down	1.56255e-17	9.34662e-17
BnaA04g13150D	GSBRNA2T00032904001	BnaA04G0148400ZS	406	165	2.08506	0.856528	-1.28352	Down	5.07964e-24	3.73688e-23
BnaA04g13220D	GSBRNA2T00032914001	BnaA04G0149100ZS	66	30	0.633194	0.290923	-1.12201	Down	0.000268706	0.000704888
BnaA04g13340D	GSBRNA2T00032932001	BnaA04G0150400ZS	299	733	2.96559	7.34868	1.30916	Up	7.8503e-44	9.01641e-43
BnaA04g13360D	GSBRNA2T00032935001	BnaC08G0502500ZS	33	0	0.207667	0.001	-7.69813	Down	1.39668e-10	6.09759e-10
BnaA04g13370D	GSBRNA2T00032940001	BnaA04G0150600ZS	0	12	0.001	0.146473	7.19449	Up	0.000227634	0.000602382
BnaC05g25460D	GSBRNA2T00032987001		6	92	0.036438	0.564749	3.9541	Up	2.36014e-21	1.60531e-20
BnaC03g69750D	GSBRNA2T00033048001	BnaC04G0248500ZS	134	692	1.87097	9.76637	2.38404	Up	6.67482e-93	1.41287e-91
BnaC03g69670D	GSBRNA2T00033057001	BnaC03G0800800ZS	60	10	0.192401	0.0324132	-2.56947	Down	6.11384e-10	2.57044e-09
BnaC03g69650D	GSBRNA2T00033059001	BnaC03G0800600ZS	39	169	0.140688	0.61623	2.13097	Up	5.2582e-21	3.5368e-20
BnaA07g10410D	GSBRNA2T00033120001	BnaC07G0179800ZS	8	39	0.228153	1.12426	2.3009	Up	2.7748e-06	8.95614e-06
BnaA07g10270D	GSBRNA2T00033141001	BnaA07G0120400ZS	3	32	0.0617288	0.665551	3.43053	Up	1.93116e-07	6.84283e-07
BnaA07g10140D	GSBRNA2T00033161001	BnaA07G0118900ZS	111	221	0.452035	0.909716	1.00898	Up	6.38324e-10	2.67986e-09
BnaA07g10030D	GSBRNA2T00033180001	BnaC07G0174100ZS	10649	5181	165.975	81.6231	-1.02392	Down	0	0
BnaA07g10020D	GSBRNA2T00033181001	BnaA07G0117500ZS	145	408	0.971094	2.76197	1.50801	Up	9.86538e-31	8.67753e-30
BnaA07g10010D	GSBRNA2T00033182001	BnaA07G0117500ZS	9	32	0.322309	1.15836	1.84557	Up	0.00023774	0.000627653
BnaA07g09970D	GSBRNA2T00033188001	BnaA07G0117100.1ZS	395	149	3.96809	1.51299	-1.39104	Down	2.78944e-26	2.18282e-25
BnaA07g09960D	GSBRNA2T00033189001	BnaA07G0117000ZS	274	31	0.657514	0.0751936	-3.12834	Down	1.8383e-49	2.31518e-48
BnaA07g09950D	GSBRNA2T00033190001	BnaA07G0116900ZS	8857	4358	88.9757	44.2524	-1.00766	Down	0	0
BnaA07g09930D	GSBRNA2T00033193001	BnaA07G0116600ZS	5	53	0.0849889	0.910611	3.42149	Up	1.46282e-11	6.73818e-11
BnaA07g09790D	GSBRNA2T00033208001	BnaA07G0115800ZS	756	200	0.995702	0.266258	-1.90289	Down	1.56705e-75	2.79156e-74
BnaA07g09660D	GSBRNA2T00033232001	BnaA03G0438300ZS	148	2	3.56064	0.0486364	-6.19396	Down	1.76728e-41	1.93986e-40
BnaA07g09580D	GSBRNA2T00033244001	BnaA07G0111900ZS	1857	838	28.7522	13.115	-1.13246	Down	1.68027e-85	3.3316e-84
BnaA07g09540D	GSBRNA2T00033248001	BnaA07G0113100ZS	2	17	0.0184882	0.158847	3.10296	Up	0.000368796	0.000952458
BnaA05g14300D	GSBRNA2T00033264001	BnaA05G0159600ZS	17	1	0.597405	0.035521	-4.07197	Down	8.36096e-05	0.000232949
BnaA05g14370D	GSBRNA2T00033278001	BnaC09G0068500ZS	593	2	5.08127	0.0173226	-8.19639	Down	3.26888e-173	1.28724e-171
BnaA05g14420D	GSBRNA2T00033283001	BnaC06G0129800ZS	1185	562	9.30426	4.46031	-1.06075	Down	7.64326e-50	9.67922e-49
BnaA05g14430D	GSBRNA2T00033287001	BnaA05G0161100ZS	5118	355	74.9159	5.25251	-3.83419	Down	0	0
BnaA05g14490D	GSBRNA2T00033299001	BnaA05G0161700ZS	635	123	1.83438	0.359158	-2.3526	Down	5.56642e-83	1.06901e-81
BnaA05g14520D	GSBRNA2T00033303001	BnaC06G0128900ZS	0	43	0.001	0.497944	8.95984	Up	8.97036e-14	4.59729e-13
BnaA05g14600D	GSBRNA2T00033315001	BnaA05G0162700ZS	4079	12982	18.2859	58.8259	1.68572	Up	0	0
BnaA05g14650D	GSBRNA2T00033322001	BnaA05G0163500ZS	10	33	0.155602	0.51903	1.73796	Up	0.000339688	0.000880944
BnaA05g14710D	GSBRNA2T00033329001	BnaA05G0164100ZS	20	2	0.121696	0.012301	-3.30643	Down	7.31836e-05	0.000205226
BnaA05g14780D	GSBRNA2T00033342001	BnaC06G0023300ZS	0	74	0.001	0.441398	8.78594	Up	3.53494e-23	2.53836e-22
BnaC09g20270D	GSBRNA2T00033471001	BnaC09G0249500ZS	64	2	0.184315	0.00582204	-4.9845	Down	4.3294e-17	2.54607e-16
BnaC09g20150D	GSBRNA2T00033493001	BnaC09G0248200ZS	0	186	0.001	1.19515	10.223	Up	3.72472e-57	5.24803e-56
BnaC09g19980D	GSBRNA2T00033519001	BnaC07G0339500ZS	0	43	0.001	0.977977	9.93366	Up	8.97036e-14	4.59472e-13
BnaC09g19970D	GSBRNA2T00033520001	BnaC07G0339400ZS	0	17	0.001	0.802138	9.64771	Up	6.9246e-06	2.15351e-05
BnaC06g06210D	GSBRNA2T00033536001	BnaC06G0076100ZS	69	498	0.37728	2.75238	2.86697	Up	2.08572e-82	3.97534e-81
BnaC06g06120D	GSBRNA2T00033549001	BnaC06G0074100ZS	102	725	1.16005	8.33451	2.84491	Up	3.0838e-118	8.04102e-117
BnaC06g05990D	GSBRNA2T00033566001	BnaC06G0072700ZS	2570	465	26.0689	4.76768	-2.45097	Down	0	0
BnaC06g05920D	GSBRNA2T00033573001	BnaC06G0072100ZS	133	51	2.56772	0.995245	-1.36736	Down	1.35727e-09	5.57782e-09
BnaC06g05660D	GSBRNA2T00033602001	BnaC06G0070600ZS	1	486	0.00288257	1.41606	8.94031	Up	8.93508e-146	2.90145e-144
BnaA06g38590D	GSBRNA2T00033624001	BnaC03G0619300ZS	0	45	0.001	0.747434	9.5458	Up	2.21856e-14	1.1682e-13
BnaA06g38620D	GSBRNA2T00033628001	BnaC06G0456800.2ZS	224	15	1.00514	0.0680352	-3.88497	Down	9.22252e-49	1.15043e-47
BnaCnng37610D	GSBRNA2T00033640001	BnaC04G0162500ZS	7	83	0.142781	1.71126	3.58318	Up	4.69572e-18	2.85896e-17
BnaCnng37690D	GSBRNA2T00033654001	BnaC08G0031100ZS	0	35	0.001	0.53111	9.05287	Up	2.3975e-11	1.09106e-10
BnaC09g50950D	GSBRNA2T00033680001	BnaC09G0074000ZS	0	114	0.001	0.921729	9.8482	Up	2.592e-35	2.52361e-34
BnaCnng78440D	GSBRNA2T00033694001	BnaC03G0155500ZS	2182	7704	31.9894	114.165	1.83545	Up	0	0
BnaUnng05260D	GSBRNA2T00033698001	BnaA07G0138200ZS	354	154	6.32667	2.782	-1.18532	Down	7.67252e-19	4.79315e-18
BnaA05g35160D	GSBRNA2T00033784001	BnaA05G0118300ZS	67	469	0.974645	6.89619	2.82285	Up	1.77718e-76	3.19617e-75
BnaA05g35220D	GSBRNA2T00033790001	BnaA05G0117700ZS	820	124	7.37668	1.12754	-2.70979	Down	4.23292e-125	1.18146e-123
BnaCnng37800D	GSBRNA2T00033791001	BnaC09G0193100ZS	6	44	0.0973991	0.721973	2.88997	Up	1.48277e-08	5.69847e-08
BnaC03g71620D	GSBRNA2T00033836001	BnaC03G0142700ZS	96	668	0.632547	4.449	2.81424	Up	7.40424e-108	1.77129e-106
BnaC03g71640D	GSBRNA2T00033845001	BnaC03G0143000ZS	577	1391	4.74069	11.552	1.28498	Up	2.5665e-79	4.73418e-78
BnaA02g34960D	GSBRNA2T00033853001	BnaA02G0042000ZS	142	458	0.553303	1.80387	1.70495	Up	1.21896e-40	1.31903e-39
BnaA02g34970D	GSBRNA2T00033854001	BnaA02G0041900ZS	190	435	0.74936	1.73417	1.21051	Up	8.65124e-24	6.32311e-23
BnaA02g35020D	GSBRNA2T00033861001	BnaA02G0041400ZS	509	1254	4.6776	11.6484	1.3163	Up	2.41418e-74	4.24598e-73
BnaC01g43250D	GSBRNA2T00033874001	BnaC01G0336200ZS	405	99	6.99821	1.72915	-2.01693	Down	1.98851e-44	2.30446e-43
BnaCnng37890D	GSBRNA2T00033895001	BnaC09G0352400ZS	1192	358	9.49429	2.88227	-1.71986	Down	6.24334e-103	1.44092e-101
BnaCnng37900D	GSBRNA2T00033899001	BnaA10G0097100ZS	1137	234	4.06408	0.84544	-2.26516	Down	1.28492e-140	4.03833e-139
BnaAnng17540D	GSBRNA2T00033978001	BnaA05G0347100ZS	59	721	0.337551	4.16954	3.62671	Up	1.69862e-147	5.58511e-146
BnaAnng17550D	GSBRNA2T00033979001	BnaC05G0377200ZS	59	659	1.62819	18.3824	3.49699	Up	6.8634e-131	2.00896e-129
BnaAnng17560D	GSBRNA2T00033980001		312	109	4.06587	1.43579	-1.50172	Down	1.85949e-23	1.34448e-22
BnaAnng17570D	GSBRNA2T00033981001		94	40	2.01366	0.866128	-1.21716	Down	3.33922e-06	1.07124e-05
BnaAnng17580D	GSBRNA2T00033983001		623	189	4.97064	1.52423	-1.70535	Down	5.1059e-54	6.88831e-53
BnaAnng17590D	GSBRNA2T00033985001		36	83	0.374064	0.871739	1.22061	Up	1.06439e-05	3.25454e-05
BnaCnng37960D	GSBRNA2T00034010001	BnaC03G0191000ZS	46	92	2.11572	4.27714	1.0155	Up	6.35634e-05	0.00017947
BnaCnng38000D	GSBRNA2T00034014001	BnaC03G0190700ZS	0	347	0.001	3.06995	11.584	Up	5.3548e-106	1.26696e-104
BnaCnng38060D	GSBRNA2T00034028001	BnaC09G0342800ZS	3	56	0.0206669	0.389948	4.23789	Up	4.67282e-14	2.42893e-13
BnaAnng41720D	GSBRNA2T00034049001	BnaA02G0304600ZS	665	158	4.25617	1.02216	-2.05793	Down	1.00108e-73	1.74892e-72
BnaC03g71320D	GSBRNA2T00034094001	BnaC03G0002300ZS	911	283	3.60511	1.13201	-1.67115	Down	5.12808e-76	9.17984e-75
BnaC03g71330D	GSBRNA2T00034096001	BnaC03G0002200ZS	1476	672	4.52877	2.08415	-1.11966	Down	3.94254e-67	6.32281e-66
BnaC03g71340D	GSBRNA2T00034097001	BnaA03G0000400ZS	68	29	0.200954	0.0866264	-1.21399	Down	8.19232e-05	0.000228467
BnaC03g71350D	GSBRNA2T00034099001	BnaC03G0001700ZS	221	89	1.42515	0.580127	-1.29667	Down	5.9113e-14	3.05666e-13
BnaC03g71360D	GSBRNA2T00034100001	BnaC03G0001600ZS	47	7	0.419591	0.0631672	-2.73174	Down	1.6326e-08	6.25496e-08
BnaAnng17610D	GSBRNA2T00034131001	BnaC07G0005700ZS	46	14	0.387788	0.119297	-1.70071	Down	3.25678e-05	9.48359e-05
BnaAnng17630D	GSBRNA2T00034137001	BnaC02G0311700ZS	0	13	0.001	0.318587	8.31555	Up	0.000113206	0.000311093
BnaCnng38200D	GSBRNA2T00034152001	BnaA04G0045400ZS	234	82	2.05002	0.72614	-1.49732	Down	6.69716e-18	4.05764e-17
BnaC01g40780D	GSBRNA2T00034164001	BnaC08G0221800ZS	0	80	0.001	0.875119	9.77334	Up	5.34774e-25	4.04615e-24
BnaC01g40800D	GSBRNA2T00034166001	BnaA01G0091100ZS	1486	3633	5.69094	14.0636	1.30522	Up	5.04742e-209	2.41732e-207
BnaC05g51120D	GSBRNA2T00034232001	BnaC05G0241700ZS	25	71	0.13275	0.381082	1.52139	Up	1.48098e-06	4.89474e-06
BnaCnng38370D	GSBRNA2T00034248001	BnaC05G0299700ZS	134	40	2.59771	0.78381	-1.72867	Down	5.02998e-13	2.4908e-12
BnaCnng38380D	GSBRNA2T00034249001	BnaC05G0299600ZS	1197	441	17.9412	6.68129	-1.42508	Down	5.27854e-79	9.72214e-78
BnaA04g27150D	GSBRNA2T00034273001	BnaA04G0293800ZS	61	126	1.08812	2.27186	1.06204	Up	1.16912e-06	3.89546e-06
BnaA04g27180D	GSBRNA2T00034276001	BnaA04G0293500ZS	16	45	0.0857854	0.243877	1.50735	Up	0.000149216	0.000403607
BnaCnng78690D	GSBRNA2T00034306001	BnaC01G0143800ZS	9	62	0.0594683	0.414095	2.79977	Up	3.12018e-11	1.41284e-10
BnaCnng78710D	GSBRNA2T00034313001	BnaC05G0449300ZS	207	38	2.42476	0.449932	-2.43006	Down	3.61162e-29	3.05368e-28
BnaA04g27560D	GSBRNA2T00034336001	BnaA04G0026900ZS	17801	8006	219.478	99.7762	-1.13731	Down	0	0
BnaA04g27590D	GSBRNA2T00034339001	BnaA04G0026600ZS	1184	435	9.44661	3.50815	-1.42909	Down	1.72584e-78	3.16043e-77
BnaAnng17650D	GSBRNA2T00034345001	BnaA02G0016100ZS	615	1567	3.5164	9.05642	1.36484	Up	1.26058e-97	2.78654e-96
BnaAnng17710D	GSBRNA2T00034351001	BnaA02G0015400ZS	9	44	0.0789206	0.39	2.305	Up	5.98798e-07	2.04184e-06
BnaAnng17740D	GSBRNA2T00034354001	BnaA02G0015200ZS	1327	3458	3.7167	9.78986	1.39727	Up	9.0253e-221	4.60196e-219
BnaAnng17750D	GSBRNA2T00034355001	BnaC02G0015200ZS	0	555	0.001	7.16146	12.806	Up	4.24684e-169	1.6193e-167
BnaC02g46080D	GSBRNA2T00034363001	BnaC02G0220400ZS	9	62	0.0656138	0.456888	2.79977	Up	3.12018e-11	1.41293e-10
BnaC03g76450D	GSBRNA2T00034385001	BnaC01G0189700ZS	10	224	0.109356	2.47604	4.50092	Up	1.38676e-54	1.88649e-53
BnaAnng41970D	GSBRNA2T00034426001	BnaC02G0296600ZS	41	110	0.841781	2.28283	1.4393	Up	8.28446e-09	3.23848e-08
BnaAnng42000D	GSBRNA2T00034450001	BnaC03G0778100ZS	4519	15967	27.8586	99.4958	1.83651	Up	0	0
BnaAnng17760D	GSBRNA2T00034483001	BnaC03G0623300ZS	4	29	0.0259014	0.189813	2.87348	Up	5.35104e-06	1.68356e-05
BnaAnng17890D	GSBRNA2T00034511001	Bnascaffold0415G0000300ZS	64	196	0.255205	0.790006	1.63021	Up	3.03322e-17	1.79344e-16
BnaCnng38570D	GSBRNA2T00034526001	BnaC06G0206200ZS	40	132	0.116592	0.38891	1.73796	Up	4.3433e-13	2.15805e-12
BnaCnng38610D	GSBRNA2T00034531001	BnaC08G0109600ZS	1	15	0.0162051	0.245702	3.92239	Up	0.000253188	0.000666421
BnaAnng17930D	GSBRNA2T00034544001	BnaA01G0001200ZS	186	369	0.646609	1.29664	1.00381	Up	1.74549e-15	9.60486e-15
BnaAnng17960D	GSBRNA2T00034550001	BnaA01G0000800ZS	50	101	0.14493	0.29592	1.02985	Up	2.23068e-05	6.60662e-05
BnaAnng18000D	GSBRNA2T00034555001	BnaA01G0000400ZS	452	217	5.85776	2.84261	-1.04313	Down	1.60194e-19	1.02593e-18
BnaCnng38840D	GSBRNA2T00034634001	BnaA09G0159500ZS	0	868	0.001	4.58363	12.1623	Up	4.71718e-264	2.88713e-262
BnaC03g73840D	GSBRNA2T00034667001	BnaC03G0432000ZS	32	80	0.17872	0.451624	1.33742	Up	3.46736e-06	1.10919e-05
BnaC06g11270D	GSBRNA2T00034683001	BnaA02G0300800ZS	48	15	0.447243	0.141273	-1.66258	Down	2.93424e-05	8.5894e-05
BnaC06g11250D	GSBRNA2T00034687001		16	92	0.43896	2.55128	2.53906	Up	1.45541e-14	7.73296e-14
BnaC06g11230D	GSBRNA2T00034689001	BnaC06G0143200ZS	0	80	0.001	1.53278	10.5819	Up	5.34774e-25	4.04573e-24
BnaC06g11210D	GSBRNA2T00034691001	BnaC06G0143100ZS	68	193	0.422816	1.21301	1.52049	Up	1.64906e-15	9.08308e-15
BnaC06g11190D	GSBRNA2T00034693001	BnaC06G0142900ZS	1956	887	12.8791	5.90344	-1.1254	Down	4.43928e-89	9.0846e-88
BnaC06g11070D	GSBRNA2T00034707001	BnaC06G0141600ZS	117	56	1.88623	0.91256	-1.04751	Down	4.19452e-06	1.33239e-05
BnaC06g10990D	GSBRNA2T00034721001	BnaC06G0140800ZS	12	77	0.296298	1.92178	2.69732	Up	3.63836e-13	1.81468e-12
BnaC06g10780D	GSBRNA2T00034753001	BnaC06G0138500ZS	1229	604	18.2459	9.06392	-1.00937	Down	9.97596e-48	1.22483e-46
BnaC06g10740D	GSBRNA2T00034760001	BnaC06G0138300ZS	627	0	9.06472	0.001	-13.146	Down	5.18794e-188	2.20775e-186
BnaC06g10600D	GSBRNA2T00034781001	BnaC06G0136800ZS	33	223	0.194005	1.32516	2.772	Up	1.63516e-36	1.63656e-35
BnaC06g10520D	GSBRNA2T00034796001	BnaC06G0136200ZS	6	27	0.15903	0.723364	2.18542	Up	0.000172865	0.000464029
BnaA06g12610D	GSBRNA2T00034809001	BnaA06G0126900ZS	47	137	0.197311	0.581352	1.55894	Up	8.58054e-12	4.00402e-11
BnaA06g12570D	GSBRNA2T00034814001	BnaA06G0126500ZS	158	538	1.35386	4.65977	1.78318	Up	2.06156e-50	2.63253e-49
BnaA06g12540D	GSBRNA2T00034817001	BnaA06G0126200ZS	1118	154	3.21088	0.447062	-2.84442	Down	7.2433e-179	2.93264e-177
BnaA06g12500D	GSBRNA2T00034824001	BnaA06G0125800ZS	1774	3578	5.46815	11.1479	1.02764	Up	4.2104e-141	1.32668e-139
BnaA06g12290D	GSBRNA2T00034848001	BnaC09G0316500ZS	66	0	0.825685	0.001	-9.68945	Down	1.94031e-20	1.28066e-19
BnaA06g12200D	GSBRNA2T00034863001	BnaA06G0123200ZS	38	99	0.0251159	0.0661402	1.39693	Up	9.16188e-08	3.3309e-07
BnaA06g12170D	GSBRNA2T00034866001	BnaA01G0368700ZS	31	7	0.410828	0.0937694	-2.13135	Down	8.05162e-05	0.00022474
BnaA06g12120D	GSBRNA2T00034871001	BnaA06G0122900ZS	167	338	0.173198	0.35433	1.03267	Up	6.40118e-15	3.44935e-14
BnaA06g12060D	GSBRNA2T00034877001	BnaA06G0122300ZS	200	534	0.72566	1.95843	1.43234	Up	6.64028e-37	6.70733e-36
BnaA06g11890D	GSBRNA2T00034897001	BnaA06G0121200ZS	239	1175	1.6501	8.20001	2.31307	Up	6.06068e-151	2.04976e-149
BnaA06g11850D	GSBRNA2T00034902001	BnaA06G0120700ZS	0	14	0.001	0.108213	6.75773	Up	5.6299e-05	0.000159858
BnaA06g11810D	GSBRNA2T00034906001	BnaA06G0120400ZS	109	250	1.84274	4.27212	1.2131	Up	2.33192e-14	1.22683e-13
BnaA06g11690D	GSBRNA2T00034919001	BnaA06G0119400ZS	115	18	1.35215	0.213927	-2.66007	Down	1.68189e-18	1.03946e-17
BnaA09g26320D	GSBRNA2T00034964001	BnaA09G0411800ZS	34	2677	0.184722	14.7012	6.31443	Up	0	0
BnaA09g26490D	GSBRNA2T00034989001	BnaA09G0413300ZS	108	19	0.84445	0.150165	-2.49146	Down	2.52364e-16	1.43833e-15
BnaA09g26520D	GSBRNA2T00034999001	BnaA09G0413800ZS	3509	1429	23.6354	9.7292	-1.28056	Down	9.5116e-194	4.16121e-192
BnaA09g26540D	GSBRNA2T00035002001	BnaA09G0414000ZS	1469	699	15.2978	7.35781	-1.05597	Down	6.2974e-61	9.33382e-60
BnaA09g26590D	GSBRNA2T00035009001		915	2143	4.81776	11.4054	1.24328	Up	3.47588e-115	8.82181e-114
BnaA09g26620D	GSBRNA2T00035012001	BnaA09G0414600ZS	3352	867	46.6633	12.1999	-1.93542	Down	0	0
BnaA09g26740D	GSBRNA2T00035029001	BnaA09G0415800ZS	24	0	0.120744	0.001	-6.9158	Down	6.81448e-08	2.50004e-07
BnaA02g24120D	GSBRNA2T00035114001	BnaA02G0295300.1ZS	2	53	0.00896158	0.240047	4.74342	Up	3.34852e-14	1.75099e-13
BnaA02g24030D	GSBRNA2T00035123001	BnaA02G0294600ZS	44	144	0.796993	2.63651	1.72599	Up	4.98892e-14	2.58975e-13
BnaA02g24020D	GSBRNA2T00035126001	BnaA02G0294400ZS	6140	2871	14.1063	6.6672	-1.08119	Down	3.02566e-258	1.79201e-256
BnaA02g24010D	GSBRNA2T00035128001	BnaA02G0294300ZS	66	209	0.314986	1.00823	1.67846	Up	5.28618e-19	3.3236e-18
BnaA02g23980D	GSBRNA2T00035131001	Bnascaffold0027G0009000ZS	35	726	0.081206	1.70264	4.39004	Up	6.73542e-171	2.59927e-169
BnaA02g23970D	GSBRNA2T00035133001	BnaA02G0294000ZS	22	1	0.764523	0.0351263	-4.44394	Down	3.35428e-06	1.07583e-05
BnaA02g23960D	GSBRNA2T00035134001	BnaA02G0293900ZS	61	11	0.590051	0.107552	-2.45581	Down	1.19662e-09	4.93584e-09
BnaA02g23880D	GSBRNA2T00035144001	BnaA02G0293000ZS	342	741	2.77347	6.07409	1.13097	Up	1.65428e-35	1.61751e-34
BnaA02g23810D	GSBRNA2T00035156001	BnaA02G0291900.1ZS	738	89	0.629843	0.0767769	-3.03625	Down	9.35208e-127	2.64656e-125
BnaA02g23770D	GSBRNA2T00035165001	BnaA02G0291400ZS	40	11	0.466805	0.129758	-1.847	Down	4.22776e-05	0.000121699
BnaA02g23660D	GSBRNA2T00035186001	BnaA02G0290400ZS	397	140	4.93373	1.75864	-1.48822	Down	4.75056e-29	4.00236e-28
BnaA02g23620D	GSBRNA2T00035193001	BnaA02G0289900ZS	274	115	1.56666	0.664638	-1.23705	Down	7.4016e-16	4.13491e-15
BnaC09g42390D	GSBRNA2T00035221001	BnaC09G0428800ZS	2	22	0.0762828	0.848172	3.47493	Up	1.73371e-05	5.18565e-05
BnaC09g42380D	GSBRNA2T00035222001	BnaC05G0451800ZS	0	22	0.001	0.44871	8.80964	Up	2.10646e-07	7.43809e-07
BnaC09g42270D	GSBRNA2T00035235001	BnaC09G0507700ZS	153	37	0.763193	0.186556	-2.03244	Down	6.80396e-18	4.12133e-17
BnaC09g42020D	GSBRNA2T00035269001	BnaA02G0269000ZS	0	197	0.001	1.87024	10.869	Up	1.71411e-60	2.52529e-59
BnaC09g42010D	GSBRNA2T00035270001	BnaC09G0505600ZS	229	53	3.89249	0.910611	-2.09579	Down	4.88566e-27	3.91125e-26
BnaC09g41930D	GSBRNA2T00035279001	BnaC09G0505000ZS	54	16	1.28924	0.386121	-1.73939	Down	4.64152e-06	1.46865e-05
BnaC09g41920D	GSBRNA2T00035280001	BnaC09G0504900ZS	90	197	0.638767	1.41329	1.14569	Up	9.82146e-11	4.32542e-10
BnaC09g41600D	GSBRNA2T00035325001	BnaC09G0501200ZS	289	99	2.81873	0.976015	-1.53007	Down	2.08172e-22	1.46205e-21
BnaC01g23650D	GSBRNA2T00035390001	BnaA01G0209100ZS	25	65	0.0723756	0.190209	1.39401	Up	1.61593e-05	4.84897e-05
BnaA09g47300D	GSBRNA2T00035409001	BnaC08G0216000ZS	476	1195	1.6141	4.09595	1.34347	Up	3.83786e-73	6.65728e-72
BnaA09g47240D	GSBRNA2T00035416001	BnaC08G0216000ZS	261	127	0.916164	0.45061	-1.02373	Down	1.40004e-11	6.45794e-11
BnaA09g47030D	GSBRNA2T00035441001	BnaA09G0646400ZS	196	2500	2.26481	29.1998	3.6885	Up	0	0
BnaA09g46900D	GSBRNA2T00035456001	BnaC08G0505900ZS	64	26	0.735904	0.30219	-1.28406	Down	6.5827e-05	0.000185597
BnaA09g46890D	GSBRNA2T00035457001	BnaA09G0645700ZS	357	118	2.8054	0.93729	-1.58164	Down	1.37072e-28	1.13951e-27
BnaA09g46650D	GSBRNA2T00035485001	BnaC08G0501200ZS	151	67	0.899555	0.403451	-1.15682	Down	1.43664e-08	5.52523e-08
BnaA09g46620D	GSBRNA2T00035489001	BnaC08G0501200ZS	147	43	0.825415	0.244055	-1.75791	Down	1.87865e-14	9.92495e-14
BnaA09g46450D	GSBRNA2T00035509001	BnaC08G0500500ZS	504	238	4.76706	2.27542	-1.06697	Down	2.42894e-22	1.70216e-21
BnaA09g46400D	GSBRNA2T00035516001	BnaA09G0642200ZS	1627	6644	7.21445	29.779	2.04533	Up	0	0
BnaA09g46380D	GSBRNA2T00035518001	BnaA09G0641100ZS	7	76	0.0468136	0.51375	3.45607	Up	3.51984e-16	1.99355e-15
BnaA09g46300D	GSBRNA2T00035526001	BnaA09G0641800ZS	0	16	0.001	0.277922	8.11854	Up	1.3924e-05	4.20593e-05
BnaA09g46280D	GSBRNA2T00035528001	BnaA09G0634800ZS	8268	2499	72.3664	22.1089	-1.71069	Down	0	0
BnaA09g46260D	GSBRNA2T00035531001	BnaA09G0640500ZS	3130	1202	23.4569	9.10534	-1.36523	Down	8.53278e-191	3.69551e-189
BnaA09g46240D	GSBRNA2T00035533001	BnaA09G0640300ZS	229	1	1.93573	0.00854424	-7.82371	Down	4.58434e-67	7.34245e-66
BnaA09g46150D	GSBRNA2T00035545001	BnaC08G0496900ZS	167	474	1.42837	4.09796	1.52053	Up	7.42438e-36	7.31199e-35
BnaA06g13410D	GSBRNA2T00035570001	BnaA06G0134600ZS	3	68	0.0374811	0.858747	4.518	Up	1.84737e-17	1.10179e-16
BnaA06g12900D	GSBRNA2T00035638001	BnaC08G0248300ZS	41	8	0.266593	0.0525799	-2.34206	Down	1.39885e-06	4.63123e-06
BnaA06g12870D	GSBRNA2T00035641001	BnaA06G0129400ZS	524	2151	5.33251	22.1261	2.05286	Up	1.21782e-236	6.639e-235
BnaA06g12860D	GSBRNA2T00035644001	BnaA06G0129300ZS	3	22	0.0363674	0.269574	2.88997	Up	7.88786e-05	0.000220387
BnaC09g08980D	GSBRNA2T00035703001		69	177	0.931528	2.41538	1.37458	Up	1.54562e-12	7.47459e-12
BnaC09g09530D	GSBRNA2T00035776001	BnaA09G0113500ZS	22	2	0.125332	0.0115168	-3.44394	Down	2.17626e-05	6.45066e-05
BnaC09g09580D	GSBRNA2T00035786001	BnaA09G0114000ZS	276	580	2.27962	4.84224	1.08688	Up	1.68608e-26	1.3282e-25
BnaC09g09610D	GSBRNA2T00035791001	BnaC09G0117400ZS	859	417	12.4765	6.12209	-1.02711	Down	8.29056e-35	7.98173e-34
BnaA03g57140D	GSBRNA2T00035803001	BnaA03G0265400ZS	80	223	0.49776	1.40249	1.49447	Up	2.76898e-17	1.63945e-16
BnaA03g57170D	GSBRNA2T00035807001	BnaA03G0265200ZS	18	2	0.0712616	0.00800346	-3.15443	Down	0.00024259	0.000639882
BnaCnng38980D	GSBRNA2T00035831001	Bnascaffold2752G0000100ZS	0	34	0.001	0.132264	7.04728	Up	4.8209e-11	2.1596e-10
BnaCnng39050D	GSBRNA2T00035848001	BnaC04G0244800ZS	0	14	0.001	0.378283	8.56332	Up	5.6299e-05	0.000159951
BnaC04g56430D	GSBRNA2T00035888001	BnaC04G0501300ZS	0	12	0.001	0.0745801	6.22072	Up	0.000227634	0.000602361
BnaC04g56440D	GSBRNA2T00035893001	BnaC04G0501800ZS	371	3	2.01098	0.0164369	-6.93482	Down	1.64846e-105	3.88899e-104
BnaC09g52810D	GSBRNA2T00035895001	BnaC09G0338900ZS	0	20	0.001	0.267535	8.06358	Up	8.51704e-07	2.86794e-06
BnaC06g43370D	GSBRNA2T00035907001	BnaA09G0203800ZS	135	41	1.84647	0.566834	-1.70377	Down	7.07652e-13	3.48213e-12
BnaC05g51260D	GSBRNA2T00035970001	BnaC05G0297700ZS	1	736	0.00706003	5.25229	9.53906	Up	1.94212e-221	9.93736e-220
BnaCnng39190D	GSBRNA2T00035973001	BnaC09G0567200.1ZS	816	167	2.40011	0.496503	-2.27323	Down	7.1678e-102	1.63983e-100
BnaCnng39350D	GSBRNA2T00036001001	BnaC08G0101600ZS	1	51	0.019426	1.00143	5.68792	Up	9.10888e-15	4.87796e-14
BnaC05g49420D	GSBRNA2T00036010001	BnaC05G0104800ZS	42	0	0.269731	0.001	-8.07538	Down	2.86262e-13	1.43558e-12
BnaA05g35680D	GSBRNA2T00036022001	BnaA05G0165400ZS	1906	4564	30.2087	73.1173	1.27525	Up	7.86854e-253	4.58257e-251
BnaC04g55630D	GSBRNA2T00036127001	BnaC05G0138700ZS	74	28	0.645884	0.247028	-1.3866	Down	5.20684e-06	1.64066e-05
BnaCnng39840D	GSBRNA2T00036136001	BnaC09G0450500ZS	1	20	0.0252225	0.509898	4.33742	Up	9.84262e-06	3.01773e-05
BnaCnng39960D	GSBRNA2T00036184001	BnaC03G0690800ZS	376	163	2.13426	0.935214	-1.19036	Down	4.84118e-20	3.15557e-19
BnaCnng39970D	GSBRNA2T00036185001	BnaA08G0185400ZS	52	150	0.868157	2.53134	1.54387	Up	1.27889e-12	6.21377e-12
BnaCnng39980D	GSBRNA2T00036186001	BnaA08G0185500ZS	31	7	0.116393	0.0265661	-2.13135	Down	8.05162e-05	0.000224731
BnaA06g39340D	GSBRNA2T00036248001	BnaA06G0338200ZS	59	221	0.376588	1.42584	1.92076	Up	8.75348e-24	6.39529e-23
BnaA04g28420D	GSBRNA2T00036303001	BnaC04G0483800ZS	543	1187	10.681	23.6009	1.14379	Up	7.80412e-57	1.09537e-55
BnaCnng40340D	GSBRNA2T00036326001	BnaC02G0233100ZS	70	186	1.02785	2.76063	1.42537	Up	9.26834e-14	4.74536e-13
BnaA02g35980D	GSBRNA2T00036369001	BnaA02G0214400ZS	42	3	0.554257	0.0400173	-3.79186	Down	5.73004e-10	2.41351e-09
BnaA02g36000D	GSBRNA2T00036371001	BnaC02G0286600ZS	0	13	0.001	0.09927	6.63329	Up	0.000113206	0.000310767
BnaA02g36020D	GSBRNA2T00036374001	BnaC02G0286800ZS	1923	262	12.3583	1.70194	-2.86022	Down	4e-308	2.96255e-306
BnaA03g58360D	GSBRNA2T00036381001	BnaA01G0097200ZS	76	4	0.877111	0.0466622	-4.23243	Down	2.14404e-18	1.32052e-17
BnaCnng40390D	GSBRNA2T00036391001	BnaC09G0618000ZS	61	3962	0.231346	15.1884	6.03677	Up	0	0
BnaCnng40400D	GSBRNA2T00036392001	BnaC09G0617900ZS	1	7035	0.0183616	130.569	12.7958	Up	0	0
BnaCnng40410D	GSBRNA2T00036393001	BnaC09G0617800ZS	19	435	0.0699109	1.61788	4.53244	Up	4.2425e-105	9.97348e-104
BnaCnng40430D	GSBRNA2T00036395001	BnaC09G0617600ZS	2	299	0.0122651	1.85343	7.2395	Up	2.25646e-87	4.54909e-86
BnaCnng40450D	GSBRNA2T00036397001	BnaC09G0617400ZS	72	834	0.453092	5.30499	3.54947	Up	2.65166e-167	9.99114e-166
BnaCnng40460D	GSBRNA2T00036429001	BnaA01G0259900ZS	2	17	0.014152	0.121591	3.10296	Up	0.000368796	0.000952659
BnaCnng40530D	GSBRNA2T00036450001	BnaC06G0254100ZS	73	0	0.543605	0.001	-9.08642	Down	1.57378e-22	1.10945e-21
BnaCnng40560D	GSBRNA2T00036453001	BnaC01G0269700ZS	0	51	0.001	0.565718	9.14394	Up	3.3563e-16	1.90269e-15
BnaCnng40620D	GSBRNA2T00036474001	BnaA10G0301700ZS	162	1074	0.698534	4.68103	2.74442	Up	8.74696e-168	3.31449e-166
BnaCnng40630D	GSBRNA2T00036475001	BnaC09G0623000ZS	0	34	0.001	0.278462	8.12134	Up	4.8209e-11	2.15999e-10
BnaCnng40660D	GSBRNA2T00036480001	BnaC09G0623200ZS	0	1789	0.001	13.8394	13.7565	Up	0	0
BnaCnng40680D	GSBRNA2T00036483001	BnaC09G0623300ZS	152	771	1.26547	6.48824	2.35816	Up	5.49662e-102	1.25828e-100
BnaA02g18610D	GSBRNA2T00036494001	BnaA02G0228500ZS	14	306	0.0784232	1.73262	4.46553	Up	1.07324e-73	1.8732e-72
BnaA02g18710D	GSBRNA2T00036509001	BnaA02G0229600ZS	114	44	0.832402	0.324747	-1.35796	Down	2.43e-08	9.20991e-08
BnaA02g18730D	GSBRNA2T00036512001	BnaA02G0229800ZS	128	335	0.190151	0.503036	1.40351	Up	4.43226e-23	3.17463e-22
BnaA02g18770D	GSBRNA2T00036517001	BnaA02G0230300ZS	39	237	0.268079	1.64669	2.61884	Up	1.79175e-36	1.79157e-35
BnaA02g18840D	GSBRNA2T00036527001	BnaA02G0231100ZS	30	1012	0.197532	6.73538	5.0916	Up	9.60234e-259	5.70099e-257
BnaA02g18900D	GSBRNA2T00036538001	BnaA02G0232000ZS	85	365	0.828179	3.5947	2.11786	Up	2.95658e-43	3.36362e-42
BnaA02g18920D	GSBRNA2T00036543001	BnaA02G0232200ZS	8	615	0.0322848	2.5087	6.27994	Up	6.00212e-172	2.34342e-170
BnaA02g18930D	GSBRNA2T00036544001	BnaA02G0232200ZS	2	85	0.0370129	1.59004	5.42489	Up	1.60978e-23	1.1675e-22
BnaA02g18940D	GSBRNA2T00036546001	BnaA02G0232300ZS	215	99	1.57355	0.732392	-1.10334	Down	7.1475e-11	3.17065e-10
BnaA02g18950D	GSBRNA2T00036547001	BnaA02G0232400ZS	69	29	0.534168	0.22693	-1.23505	Down	5.7717e-05	0.000163637
BnaA02g19000D	GSBRNA2T00036555001	BnaA02G0232900ZS	352	1376	2.32587	9.19023	1.98233	Up	2.3683e-145	7.67687e-144
BnaA02g19010D	GSBRNA2T00036556001	BnaA02G0233000ZS	184	413	1.41511	3.2106	1.18193	Up	6.98958e-22	4.83351e-21
BnaA02g19040D	GSBRNA2T00036559001	BnaA02G0233300ZS	411	996	2.25121	5.5144	1.2925	Up	8.22398e-58	1.16703e-56
BnaA02g19060D	GSBRNA2T00036561001	BnaA02G0233400ZS	173	678	2.81809	11.1636	1.98601	Up	1.01731e-72	1.75594e-71
BnaA02g19090D	GSBRNA2T00036568001	BnaA02G0234700ZS	109	352	1.05218	3.43457	1.70674	Up	1.17729e-31	1.05542e-30
BnaA02g19180D	GSBRNA2T00036590001	BnaC02G0316900ZS	483	1575	1.06758	3.51884	1.72075	Up	3.27264e-137	1.0057e-135
BnaA02g19190D	GSBRNA2T00036591001	BnaC02G0317000ZS	995	2924	7.95218	23.6214	1.57067	Up	3.23702e-222	1.66677e-220
BnaA05g18150D	GSBRNA2T00036599001	BnaC05G0338900ZS	320	1665	5.21265	27.415	2.39487	Up	4.0703e-222	2.09289e-220
BnaA05g18090D	GSBRNA2T00036608001		0	55	0.001	2.31834	11.1789	Up	2.05298e-17	1.22184e-16
BnaA05g18070D	GSBRNA2T00036612001	BnaA05G0323400ZS	0	14	0.001	0.19299	7.59239	Up	5.6299e-05	0.000159802
BnaA05g18060D	GSBRNA2T00036613001	BnaA05G0323300ZS	55	0	0.77836	0.001	-9.60429	Down	3.74638e-17	2.2087e-16
BnaA05g18050D	GSBRNA2T00036614001	BnaC04G0335500ZS	3	145	0.0229034	1.11895	5.61044	Up	7.15332e-40	7.63469e-39
BnaA05g17930D	GSBRNA2T00036636001	BnaA05G0321600ZS	1	16	0.00968295	0.1566	4.0155	Up	0.000132913	0.000361833
BnaC09g36150D	GSBRNA2T00036729001	BnaA09G0043600ZS	267	41	2.97177	0.461267	-2.68765	Down	1.73771e-41	1.90768e-40
BnaC09g36050D	GSBRNA2T00036747001	BnaC06G0240000ZS	0	43	0.001	1.86218	10.8628	Up	8.97036e-14	4.59664e-13
BnaC06g12110D	GSBRNA2T00036779001	BnaC06G0153800ZS	214	2	2.17307	0.0205284	-6.72597	Down	7.02922e-61	1.04143e-59
BnaC06g12160D	GSBRNA2T00036788001	BnaC06G0154400ZS	14	147	0.0783764	0.83184	3.40781	Up	1.01022e-29	8.65126e-29
BnaC06g12180D	GSBRNA2T00036790001	BnaC06G0154500ZS	83	0	3.20482	0.001	-11.646	Down	1.62145e-25	1.24427e-24
BnaC06g12200D	GSBRNA2T00036794001	BnaC01G0085100ZS	648	1	4.00003	0.00623954	-9.32435	Down	8.96258e-192	3.90008e-190
BnaA02g10440D	GSBRNA2T00036836001	BnaA02G0141300ZS	1187	2534	5.08323	10.9688	1.10959	Up	1.22816e-113	3.07241e-112
BnaA02g10460D	GSBRNA2T00036838001	BnaA02G0141500ZS	96	340	0.753763	2.69841	1.83992	Up	8.0083e-34	7.54358e-33
BnaA02g10670D	GSBRNA2T00036861001	BnaA02G0143700ZS	484	976	1.97963	4.03508	1.02737	Up	8.62316e-40	9.18872e-39
BnaA02g10680D	GSBRNA2T00036862001	BnaA02G0143800ZS	296	895	1.47337	4.50306	1.61179	Up	6.54116e-72	1.11487e-70
BnaA02g10710D	GSBRNA2T00036866001	BnaC02G0182900ZS	87	631	1.62287	11.8976	2.87405	Up	3.18848e-104	7.43367e-103
BnaA02g10830D	GSBRNA2T00036880001	BnaA02G0145000ZS	714	285	3.87019	1.56151	-1.30947	Down	2.99834e-42	3.33759e-41
BnaA02g10950D	GSBRNA2T00036893001	BnaA02G0145800ZS	3	43	0.0181485	0.262938	3.8568	Up	1.97484e-10	8.53329e-10
BnaA02g10960D	GSBRNA2T00036895001	BnaA02G0145900ZS	26	292	0.119584	1.35753	3.50488	Up	5.31504e-59	7.66853e-58
BnaA02g10970D	GSBRNA2T00036896001	BnaA02G0146000.1ZS	29378	78098	131.198	352.541	1.42605	Up	0	0
BnaA02g11010D	GSBRNA2T00036901001	BnaA02G0146400ZS	15	47	0.200487	0.634976	1.66319	Up	3.13354e-05	9.14033e-05
BnaA02g11050D	GSBRNA2T00036905001	BnaA02G0147000ZS	1314	2834	7.24381	15.792	1.12437	Up	1.47688e-129	4.28867e-128
BnaA02g11110D	GSBRNA2T00036914001	BnaA02G0147400ZS	4	25	0.00568653	0.0359246	2.65935	Up	5.27366e-05	0.000150249
BnaA02g11160D	GSBRNA2T00036921001	BnaC04G0246200ZS	0	12	0.001	0.28101	8.13448	Up	0.000227634	0.000602774
BnaA08g07620D	GSBRNA2T00036958001	BnaA08G0082300ZS	266	1141	1.79169	7.76839	2.1163	Up	2.02024e-131	5.95617e-130
BnaA09g35860D	GSBRNA2T00037088001	BnaA09G0520000ZS	35	10	0.243799	0.0704091	-1.79186	Down	0.000180384	0.000483259
[truncated: 7,137 more rows]
