# Supplementary material for: Systematic trait dissection in oilseed rape provides a comprehensive view, further insight, and exact roadmap for yield determination
Source: Biotechnol Biofuels Bioprod. 2022 Apr 19;15:38. doi: 10.1186/s13068-022-02134-w (PMC9019968; doi:10.1186/s13068-022-02134-w)
Supplement: Supplementary file 18 — Additional file 18: Table S11. List of primers used in this study, including fine-mapping, gene cloning, and qRT-PCR. [file 13068_2022_2134_MOESM18_ESM.xlsx]

## Sheet: Sheet1
Table S11. List of primers used in this study.
Primer	Sequence（5'-3'）
BnaA9.CYP78A9-RT-F	AACTCGTGACTCGCCTAGC	qRT-PCR
BnaA9.CYP78A9-RT-R	ATCCTAGCAAGAACCCAC
BnaA6.EMB93-RT-F	GTTTCGTTCTTTGTGTGTGTG
BnaA6.EMB93-RT-R	TAGACAACTACAACATAACTTCGAG
BnaActin7-F	CCCTGGAATTGCTGACCGTA
BnaActin7-R	TGGAAAGTGCTGAGGGATGC
BnaA2.FLC-PRO-F	GTTCGACGACTCAGAGCTCTAC	Gene cloning
BnaA2.FLC-PRO-R	ATGGCTTCTGTCTCCGAGAAG
BnaA2.FLC-F	ATGGGAAGAAAGAAACTAGAGATCAAG
BnaA2.FLC-R	CTAATAAAGCAGTCGGAGAGTTACC
BnaA2.FLC-3U-F	GGTAACTCTCCGACTGCTTTATTAG
BnaA2.FLC-3U-R	GATTACGGTAGCCTAGTAAGTTGG
TEap	TGCATGAACCTACCTATACG
BnaA9.CYP78A9-PRO-R2	GCTTGTGTCGAGCTTGGTCGCCAT
BnaA9.CYP78A9-cd-F	ATGGCGACCAAGCTCGACACAAGC
BnaA9.CYP78A9-cd-R	TTAACCGCGCCTGCCGC
BnaA9.CYP78A9-3U-F	CGCGGTTAATGCAATTATACGTTG
BnaA9.CYP78A9-3U-R	CATTGCTTATGTGCCTACTCC
BnaA6.EMB93QC1-F	CGCTCCTTCGGTTCTCAGTAAAATCTT
BnaA6.EMB93QC1-R	GTTACGTAGTAATCCACATGAGTCGGT
BnaA6.EMB93QC2-F	CCCATGCCTAACTCCAGCTTCAAG
BnaA6.EMB93QC2-R	CACAATCATAACATCCACGACCAA
